# Supplementary material for: A facile synthesis of 3,4-dimercaptofurans via sulfenylation of (E)-β-chlorovinyl ketones and 1,2-sulfur migration
Source: Royal Society of Chemistry journal article supplement (doi:10.1039/c6ob02772e), 2017-01-01

## A Facile Synthesis of 3,4-Dimercaptofurans via Sulfenylation of (*E*)- $\beta$ -Chlorovinyl Ketones and 1,2-Sulfur Migration

Eunsun Song, Hun Young Kim,\* and Kyungsoo Oh\*

Center for Metareceptome Research, College of Pharmacy, Chung-Ang University

84 Heukseok-ro, Dongjak, Seoul, 06974, Republic of Korea

Email: [kyungsooh@cau.ac.kr](mailto:kyungsooh@cau.ac.kr), [hunykim@cau.ac.kr](mailto:hunykim@cau.ac.kr)

### Table of Contents

|                                                                                                 |            |
|-------------------------------------------------------------------------------------------------|------------|
| <b>General Methods</b>                                                                          | <b>S2</b>  |
| <b>Preparation of Starting Materials</b>                                                        | <b>S2</b>  |
| <b>General Procedure for Sulfenylation of (<i>E</i>)-<math>\beta</math>-Chlorovinyl Ketones</b> | <b>S2</b>  |
| <b>Characterization Data of the Compounds in Table 2</b>                                        | <b>S3</b>  |
| <b>General Procedure for Synthesis of Furan via 1,2-Sulfur Migration</b>                        | <b>S11</b> |
| <b>Characterization Data of the Compounds in Scheme 4</b>                                       | <b>S11</b> |
| <b>Characterization Data of the Additional Compounds</b>                                        | <b>S16</b> |
| <b>References</b>                                                                               | <b>S17</b> |
| <b><sup>1</sup>H NMR and <sup>13</sup>C NMR Spectra</b>                                         | <b>S18</b> |

**General Methods.** All reactions were carried out under argon atmosphere with oven-dried glassware. The progress of all reactions was monitored by thin-layer chromatography on Merck KGaA precoated silica gel plates (250  $\mu\text{m}$ ) and visualized by ultra-violet light or by staining with  $\text{KMnO}_4$  stain. HPLC grade DCM was further dried through alumina columns. Unless otherwise specified, all chemicals were purchased from Sigma Aldrich or Alfa Aesar and all solvents were purchased from Fischer Scientific. The  $^1\text{H}$  NMR and  $^{13}\text{C}$  NMR spectra were obtained on Varian 600 MHz Fourier transform spectrometers. Chemical Shifts are reported in units of parts per million downfield from either a residual  $\text{CHCl}_3$  or tetramethylsilane and all coupling constants are reported in Hertz. The infrared spectra were obtained using a Thermo Nicolet IR 300 Spectrometer. Silica gel (32-64 $\mu$ , Merck KGaA) was used for column chromatography. Melting points were recorded on a Buchi-B-450 melting point apparatus and the melting point values were uncorrected.

### **Preparation of Starting Materials.**

#### **(a) Preparation of (*E*)- $\beta$ -chlorovinyl ketones**

(*E*)- $\beta$ -chlorovinyl ketones were prepared according to literature procedure and spectral data were consistent with literature value.<sup>1a,b,c</sup>

#### **(b) Preparation of N-(Arylthio)phthalimides**

N-(Arylthio)phthalimides were prepared based on a modified method as follows.<sup>2</sup> To a suspension of N-Chlorophthalimide (10 mmol) in benzene (55 mL) was added thiol (10 mmol, 1M in benzene) at once. After stirring for 5 min at ambient temperature, triethyl amine (1.45 mL, 1.05 M in benzene) was added dropwise over 5 min. After the reaction was complete (1 h), the crude mixture was treated with 1M NaOH to eliminate a phthalimide byproduct and then extracted with DCM (twice, 100 mL each) before drying over  $\text{MgSO}_4$ . After removing the three third of solvent under reduced pressure, hexanes was added and the reaction flask was allowed to stand for 20 min. The precipitate (product) was then filtered and washed with hexanes. The spectral data were compared with literature values.<sup>3</sup>

### **General Procedure for Sulfonylation of (*E*)- $\beta$ -Chlorovinyl Ketones.**

To a flask charged with (*E*)- $\beta$ -chlorovinyl ketone (1.0 mmol) under argon were added dry DCM (4 mL) and

triethylamine (1.1 mmol) at ambient temperature. The solution was left to stir until the elimination step was complete by TLC (18 h). The reaction was then cooled down to 0 °C and *t*-BuOK (1.1 mmol) was added followed by the addition of *N*-thiophthalimide (2.5 mmol) in 5 min. The reaction solution was allowed to stir at this temperature until the reaction was complete by TLC (1-2 h). The crude mixture was then concentrated under reduced pressure and chromatographed on silica gel (hexanes or 10% EtOAc in hexanes) to afford the title compound.

### Characterization Data of the Compounds in Table 2.

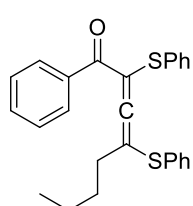

1-Phenyl-2,4-bis(phenylthio)octa-2,3-dien-1-one (**3a**): 242 mg (58%), yellow oil; <sup>1</sup>H NMR (CDCl<sub>3</sub>, 600 MHz) δ 7.69 – 7.65 (m, 2H), 7.53 (t, *J* = 7.4 Hz, 1H), 7.44 (dd, *J* = 6.5, 3.0 Hz, 2H), 7.39 (t, *J* = 7.8 Hz, 2H), 7.36 – 7.33 (m, 3H), 7.27 – 7.23 (m, 1H), 7.19 (t, *J* = 7.5 Hz, 2H), 7.02 (d, *J* = 7.4 Hz, 2H), 2.03 – 1.91 (m, 2H), 1.23 – 1.08 (m, 2H), 1.05 – 0.97 (m, 2H), 0.72 (t, *J* = 7.3 Hz, 3H); <sup>13</sup>C NMR (CDCl<sub>3</sub>, 150 MHz): δ 206.0, 190.6, 137.6, 134.4, 132.7, 132.3, 132.0, 131.5, 129.0, 128.9, 128.8, 128.5, 128.2, 128.0, 113.0, 112.0, 32.5, 29.6, 21.7, 13.6; IR (neat): 3058, 2956, 2930, 2870, 1679, 1595, 1578, 1446, 1226 cm<sup>-1</sup>; HRMS (ESI): *m/z* calcd for C<sub>26</sub>H<sub>25</sub>OS<sub>2</sub> [M+H]<sup>+</sup> 417.1341 Found 417.1349.

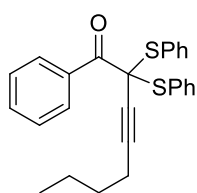

1-Phenyl-2,2-bis(phenylthio)oct-3-yn-1-one (**4a**): 49 mg (12%), yellow oil; <sup>1</sup>H NMR (CDCl<sub>3</sub>, 600 MHz) δ 8.29 (d, *J* = 7.5 Hz, 2H), 7.57 (d, *J* = 7.3 Hz, 4H), 7.52 (t, *J* = 7.3 Hz, 1H), 7.39 – 7.35 (m, 4H), 7.30 (t, *J* = 7.6 Hz, 4H), 2.04 (t, *J* = 7.0 Hz, 2H), 1.24 – 1.18 (m, 2H), 1.15 – 1.08 (m, 2H), 0.77 (t, *J* = 7.3 Hz, 3H); <sup>13</sup>C NMR (CDCl<sub>3</sub>, 150 MHz): δ 189.6, 136.7, 134.4, 132.8, 131.5, 130.6, 129.6, 128.4, 127.6, 97.1, 75.9, 67.6, 29.8, 21.7, 18.6, 13.5; IR (neat): 3058, 2956, 2930, 2870, 1680, 1595, 1472, 1438, 1226 cm<sup>-1</sup>; HRMS (ESI): *m/z* calcd for C<sub>26</sub>H<sub>25</sub>OS<sub>2</sub> [M+H]<sup>+</sup> 417.1341 Found 417.1349.

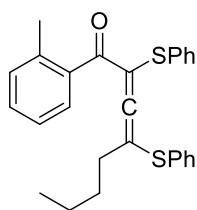

2,4-Bis(phenylthio)-1-o-tolylocta-2,3-dien-1-one (**3b**): 258 mg (60%), yellow oil; <sup>1</sup>H NMR (CDCl<sub>3</sub>, 600 MHz): δ 7.48 – 7.45 (m, 2H), 7.37 – 7.31 (m, 4H), 7.24 – 7.20 (m, 3H), 7.19 – 7.13 (m, 3H), 6.89 – 6.86 (m, 2H), 2.33 (s, 3H), 1.87 (t, *J* = 7.5 Hz, 2H), 1.16 – 1.01 (m, 2H), 0.99 – 0.91 (m, 2H), 0.72 (t, *J* = 7.3 Hz, 3H); <sup>13</sup>C NMR (CDCl<sub>3</sub>, 150 MHz): δ 207.6,

193.4, 138.3, 136.4, 134.5, 132.2, 131.9, 131.6, 130.8, 130.3, 129.0, 128.9, 128.5, 127.9, 127.8, 124.7, 113.5, 112.4, 32.3, 29.5, 21.6, 19.6, 13.7; IR (neat): 3058, 2956, 2929, 2870, 1660, 1581, 1476, 1439, 1250  $\text{cm}^{-1}$ ; HRMS (ESI):  $m/z$  calcd for  $\text{C}_{27}\text{H}_{27}\text{OS}_2$   $[\text{M}+\text{H}]^+$  431.1497 Found 431.1501.

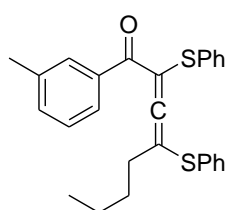

2,4-Bis(phenylthio)-1-m-tolylocta-2,3-dien-1-one (**3c**): 324 mg (75%); yellow oil;  $^1\text{H}$

NMR ( $\text{CDCl}_3$ , 600 MHz):  $\delta$  7.52 (s, 1H), 7.48 (d,  $J = 7.6$  Hz, 1H), 7.45 – 7.42 (m, 2H),

7.35 – 7.30 (m, 4H), 7.26 (t,  $J = 7.6$  Hz, 1H), 7.21 (t,  $J = 7.3$  Hz, 1H), 7.16 (t,  $J = 7.4$  Hz,

2H), 6.98 (d,  $J = 7.2$  Hz, 2H), 2.34 (s, 3H), 2.01 – 1.91 (m, 2H), 1.22 – 1.08 (m, 2H),

1.03 – 0.95 (m, 2H), 0.71 (t,  $J = 7.3$  Hz, 3H);  $^{13}\text{C}$  NMR ( $\text{CDCl}_3$ , 150 MHz):  $\delta$  206.2, 190.8, 137.7, 137.6, 134.4, 133.2, 132.4, 132.0, 131.7, 129.3, 129.0(4), 129.0(1), 128.5, 128.1, 127.9, 126.0, 112.5, 111.9, 32.6, 29.6, 21.8, 21.3, 13.7; IR (neat): 3058, 2956, 2928, 2870, 1654, 1582, 1476, 1272  $\text{cm}^{-1}$ ; HRMS (ESI):  $m/z$  calcd for  $\text{C}_{27}\text{H}_{27}\text{OS}_2$   $[\text{M}+\text{H}]^+$  431.1497 Found 431.1507.

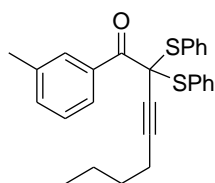

2,2-Bis(phenylthio)-1-m-tolyloct-3-yn-1-one (**4c**): 46 mg (11%), yellow oil;  $^1\text{H}$  NMR

( $\text{CDCl}_3$ , 600 MHz):  $\delta$  8.14 (d,  $J = 7.8$  Hz, 1H), 7.99 (s, 1H), 7.58 – 7.54 (m, 4H), 7.39 –

7.35 (m, 2H), 7.34 – 7.24 (m, 6H), 2.35 (s, 3H), 2.03 (t,  $J = 7.0$  Hz, 2H), 1.24 – 1.18 (m,

2H), 1.15 – 1.08 (m, 2H), 0.77 (t,  $J = 7.3$  Hz, 3H);  $^{13}\text{C}$  NMR ( $\text{CDCl}_3$ , 151 MHz):  $\delta$  189.8,

137.3, 136.8, 134.4, 133.5, 131.6, 131.1, 129.6, 128.3, 127.9, 127.4, 97.1, 76.0, 67.6, 29.8, 21.7, 21.3, 18.6, 13.4; IR (neat): 3058, 2956, 2929, 2870, 1676, 1582, 1472, 1438, 1256, 1169  $\text{cm}^{-1}$ ; HRMS (ESI):  $m/z$  calcd for  $\text{C}_{27}\text{H}_{27}\text{OS}_2$   $[\text{M}+\text{H}]^+$  431.1497 Found 431.1507.

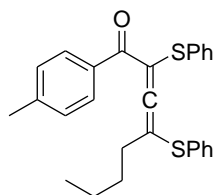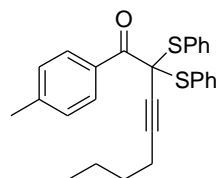

A mixture of **3d** and **4d** was isolated with a 4:1 ratio in 332 mg

(77%). (2,4-Bis(phenylthio)-1-p-tolylocta-2,3-dien-1-one (**3d**):

yellow oil;  $^1\text{H}$  NMR ( $\text{CDCl}_3$ , 600 MHz):  $\delta$  7.60 (d,  $J = 8.1$  Hz, 2H),

7.44 – 7.40 (m, 2H), 7.32 – 7.28 (m, 3H), 7.20 (t,  $J = 7.3$  Hz, 1H),

7.16 (t,  $J = 8.5$  Hz, 4H), 7.05 – 7.00 (m, 2H), 2.35 (s, 3H), 2.00 – 1.92 (m, 2H), 1.24 – 1.07 (m, 2H), 1.05 – 0.95 (m, 2H), 0.71 (t,  $J = 7.3$  Hz, 3H);  $^{13}\text{C}$  NMR ( $\text{CDCl}_3$ , 150 MHz):  $\delta$  205.6, 190.0, 143.2, 136.7, 134.4, 132.7, 132.1, 131.6, 130.9, 129.0(4), 129.0(3), 128.7, 128.4, 128.2, 112.7, 111.9, 32.6, 29.6, 21.8, 21.7, 13.7;

2,2-Bis(phenylthio)-1-p-tolyloct-3-yn-1-one (**4d**):  $^1\text{H}$  NMR ( $\text{CDCl}_3$ , 600 MHz):  $\delta$  8.22 (d,  $J = 8.2$  Hz, 2H), 7.57 (d,  $J = 7.9$  Hz, 4H), 7.33 (d,  $J = 7.4$  Hz, 1H), 7.26 (t,  $J = 7.4$  Hz, 3H), 7.20 (t,  $J = 7.3$  Hz, 4H), 2.35 (s, 3H), 2.02 (t,  $J = 7.1$  Hz, 2H), 1.23 – 1.08 (m, 4H), 0.76 (t,  $J = 7.3$  Hz, 3H); 189.1, 143.7, 134.9(25), 134.9(27), 132.1, 129.6, 129.0, 128.5, 128.4, 97.1, 76.2, 67.8, 29.9, 21.7(8), 21.7(5), 18.7, 13.5; IR (neat): 3057, 2956, 2929, 2870, 1919, 1651, 1606, 1475, 1439, 1262, 1180  $\text{cm}^{-1}$ ; HRMS (ESI):  $m/z$  calcd for  $\text{C}_{27}\text{H}_{27}\text{OS}_2$   $[\text{M}+\text{H}]^+$  431.1497 Found 431.1498

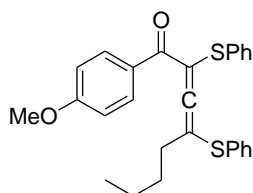

1-(4-Methoxyphenyl)-2,4-bis(phenylthio)octa-2,3-dien-1-one (**3e**): 268 mg (60%), yellow oil;  $^1\text{H}$  NMR ( $\text{CDCl}_3$ , 600 MHz):  $\delta$  7.76 – 7.72 (m, 2H), 7.45 – 7.40 (m, 2H), 7.35 – 7.31 (m, 3H), 7.26 – 7.22 (m, 1H), 7.22 – 7.17 (m, 2H), 7.09 – 7.05 (m, 2H), 6.88 – 6.84 (m, 2H), 3.84 (s, 3H), 2.04 – 1.95 (m, 2H), 1.25 – 1.10 (m, 2H), 1.08 – 1.01 (m, 2H), 0.73 (t,  $J = 7.3$  Hz, 3H);  $^{13}\text{C}$  NMR ( $\text{CDCl}_3$ , 150 MHz):  $\delta$  205.0, 188.7, 163.2, 134.3, 132.5, 132.2, 131.7, 131.3, 130.0, 128.9, 128.9, 128.4, 128.1, 113.3, 112.3, 111.5, 55.4, 32.6, 29.6, 21.8, 13.7; IR (neat): 3057, 2956, 2929, 2869, 2360, 2341, 1647, 1600, 1508, 1254, 1169  $\text{cm}^{-1}$ ; HRMS (ESI):  $m/z$  calcd for  $\text{C}_{27}\text{H}_{27}\text{O}_2\text{S}_2$   $[\text{M}+\text{H}]^+$  447.1447 Found 447.1445.

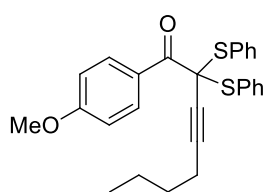

1-(4-Methoxyphenyl)-2,2-bis(phenylthio)oct-3-yn-1-one (**4e**): 54 mg (12%), yellow oil;  $^1\text{H}$  NMR ( $\text{CDCl}_3$ , 600 MHz):  $\delta$  8.36 – 8.32 (m, 2H), 7.58 – 7.56 (m, 4H), 7.39 – 7.36 (m, 2H), 7.32 – 7.29 (m, 4H), 6.88 – 6.86 (m, 2H), 3.87 (s, 3H), 2.06 (t,  $J = 7.0$  Hz, 2H), 1.26 – 1.21 (m, 2H), 1.18 – 1.12 (m, 2H), 0.79 (t,  $J = 7.3$  Hz, 3H);  $^{13}\text{C}$  NMR ( $\text{CDCl}_3$ , 150 MHz):  $\delta$  188.0, 163.3, 136.7, 133.2, 131.6, 129.5, 128.3, 126.7, 112.8, 96.9, 76.2, 67.7, 55.4, 29.9, 21.7, 18.7, 13.5; IR (neat): 3056, 2956, 2930, 2869, 2360, 2341, 1671, 1598, 1508, 1261, 1172  $\text{cm}^{-1}$ ; HRMS (ESI):  $m/z$  calcd for  $\text{C}_{27}\text{H}_{27}\text{O}_2\text{S}_2$   $[\text{M}+\text{H}]^+$  447.1447 Found 447.1445.

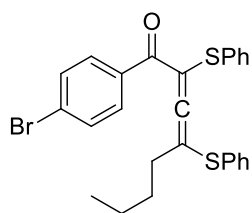

1-(4-Bromophenyl)-2,4-bis(phenylthio)octa-2,3-dien-1-one (**3f**): 260 mg (53%), yellow oil;  $^1\text{H NMR}$  ( $\text{CDCl}_3$ , 600 MHz):  $\delta$  7.51 (s, 4H), 7.42 (dd,  $J = 6.5, 3.1$  Hz, 2H), 7.36 – 7.33 (m, 3H), 7.28 – 7.24 (m, 1H), 7.24 – 7.20 (m, 2H), 7.06 – 7.02 (m, 2H), 2.02 – 1.93 (m, 2H), 1.23 – 1.07 (m, 2H), 1.06 – 0.98 (m, 2H), 0.73 (t,  $J = 7.3$  Hz, 3H);  $^{13}\text{C NMR}$  ( $\text{CDCl}_3$ , 150 MHz):  $\delta$  205.7, 189.5, 136.2, 134.4, 132.8, 131.7, 131.3(2), 131.3(0), 130.3, 129.0(9), 129.0(5), 128.6, 128.4, 127.3, 113.7, 112.1, 32.6, 29.6, 21.8, 13.7; IR (neat): 3058, 2956, 2929, 2360, 2347, 1655, 1584, 1477, 1439, 1261, 1071  $\text{cm}^{-1}$ ; HRMS (ESI):  $m/z$  calcd for  $\text{C}_{26}\text{H}_{24}\text{BrOS}_2$   $[\text{M}+\text{H}]^+$  495.0446 Found 495.0454.

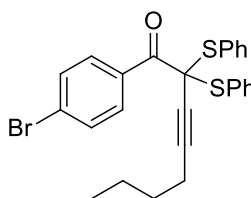

1-(4-Bromophenyl)-2,2-bis(phenylthio)oct-3-yn-1-one (**4f**): 50 mg (10%), yellow solid, m.p. 84-86 °C;  $^1\text{H NMR}$  ( $\text{CDCl}_3$ , 600 MHz):  $\delta$  8.18 – 8.15 (m, 2H), 7.58 – 7.54 (m, 4H), 7.54 – 7.51 (m, 2H), 7.40 – 7.37 (m, 2H), 7.33 – 7.29 (m, 4H), 2.05 (t,  $J = 7.0$  Hz, 2H), 1.25 – 1.19 (m, 2H), 1.16 – 1.08 (m, 2H), 0.79 (t,  $J = 7.3$  Hz, 3H);  $^{13}\text{C NMR}$  ( $\text{CDCl}_3$ , 150 MHz):  $\delta$  188.6, 136.7, 133.0, 132.2, 131.2, 131.0, 129.7, 128.5, 128.0, 97.4, 75.7, 67.4, 29.8, 21.7, 18.6, 13.4; IR (neat): 3058, 2956, 2930, 2870, 2359, 2341, 1660, 1581, 1438, 1234  $\text{cm}^{-1}$ ; HRMS (ESI):  $m/z$  calcd for  $\text{C}_{26}\text{H}_{24}\text{BrOS}_2$   $[\text{M}+\text{H}]^+$  495.0446 Found 495.0455.

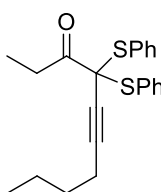

4,4-Bis(phenylthio)dec-5-yn-3-one (**4g**): 151 mg (41%), yellow oil;  $^1\text{H NMR}$  ( $\text{CDCl}_3$ , 600 MHz)  $\delta$  7.57 (d,  $J = 7.4$  Hz, 4H), 7.38 (t,  $J = 7.3$  Hz, 2H), 7.33 (t,  $J = 7.5$  Hz, 4H), 2.84 (m, 2H), 2.06 (t,  $J = 7.0$  Hz, 2H), 1.27 – 1.23 (m, 2H), 1.21 – 1.14 (m, 2H), 1.07 (t,  $J = 7.2$  Hz, 3H), 0.82 (t,  $J = 7.3$  Hz, 3H);  $^{13}\text{C NMR}$  ( $\text{CDCl}_3$ , 150 MHz):  $\delta$  200.1, 136.4, 131.6, 129.5, 128.4, 95.2, 75.0, 67.5, 31.5, 30.0, 21.7, 18.5, 13.5, 8.6; IR (neat): 3058, 2957, 2933, 2871, 2360, 2341, 1716, 1438  $\text{cm}^{-1}$ ; HRMS (ESI):  $m/z$  calcd for  $\text{C}_{22}\text{H}_{25}\text{OS}_2$   $[\text{M}+\text{H}]^+$  369.1341 Found 369.1341.

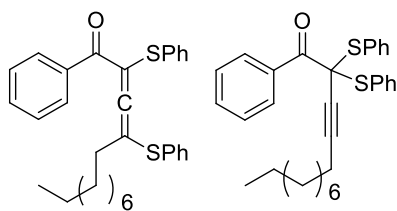

A mixture of **3h** and **4h** was isolated with a 6:1 ratio in 331 mg (68%). 1-Phenyl-2,4-bis(phenylthio)trideca-2,3-dien-1-one (**3h**): yellow oil;  $^1\text{H NMR}$  ( $\text{CDCl}_3$ , 600 MHz):  $\delta$  7.69 – 7.65 (m, 2H), 7.52 (t,  $J = 7.4$  Hz, 1H), 7.45 – 7.41 (m, 2H), 7.38 (t,  $J = 7.7$  Hz, 2H), 7.35 – 7.32 (m, 3H), 7.24 (t,

$J = 7.4$  Hz, 1H), 7.19 (t,  $J = 7.5$  Hz, 2H), 7.02 (d,  $J = 7.2$  Hz, 2H), 2.01 – 1.91 (m, 2H), 1.26 – 1.04 (m, 12H), 0.99 (m, 2H), 0.89 (t,  $J = 7.2$  Hz, 3H);  $^{13}\text{C}$  NMR ( $\text{CDCl}_3$ , 150 MHz):  $\delta$  206.0, 190.5, 137.6, 134.4, 132.7, 132.3, 132.0, 131.5, 129.0, 128.9, 128.8, 128.5, 128.2, 128.0, 113.0, 112.0, 32.9, 31.8, 29.3, 29.2(4), 29.2(1), 28.7, 27.5, 22.6, 14.1;

2-Bis(phenylthio)tridec-3-yn-1-one (**4h**):  $^1\text{H}$  NMR ( $\text{CDCl}_3$ , 600 MHz):  $\delta$  8.31 – 8.27 (m, 2H), 7.58 – 7.55 (m, 4H), 7.52 (t,  $J = 7.4$  Hz, 1H), 7.36 (dd,  $J = 7.3, 2.8$  Hz, 4H), 7.30 (t,  $J = 7.5$  Hz, 4H), 2.03 (t,  $J = 7.1$  Hz, 2H), 1.33 – 1.17 (m, 14H), 0.89 (t,  $J = 7.2$  Hz, 3H);  $^{13}\text{C}$  NMR ( $\text{CDCl}_3$ , 150 MHz):  $\delta$  189.61, 136.7, 134.4, 132.8, 131.5, 130.6, 129.6, 128.4, 127.6, 97.2, 75.9, 67.6, 32.9, 31.8, 29.4, 29.2, 29.0, 28.7, 27.8, 22.6, 19.0; IR (neat): 2925, 2853, 2359, 2341, 1657, 1581, 1477, 1439, 1248  $\text{cm}^{-1}$ ; HRMS (ESI):  $m/z$  calcd for  $\text{C}_{31}\text{H}_{35}\text{OS}_2$   $[\text{M}+\text{H}]^+$  487.2123 Found 487.2125.

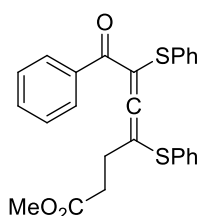

Methyl 7-oxo-7-phenyl-4,6-bis(phenylthio)hepta-4,5-dienoate (**3i**): 244 mg (55%), yellow oil;  $^1\text{H}$  NMR ( $\text{CDCl}_3$ , 600 MHz):  $\delta$  7.72 – 7.69 (m, 2H), 7.57 – 7.52 (m, 1H), 7.48 – 7.45 (m, 2H), 7.42 – 7.36 (m, 5H), 7.27 – 7.23 (m, 1H), 7.22 – 7.18 (m, 2H), 7.03 – 7.00 (m, 2H), 3.55 (s, 3H), 2.35 – 2.20 (m, 2H), 2.18 – 2.02 (m, 2H);  $^{13}\text{C}$  NMR ( $\text{CDCl}_3$ , 150 MHz):  $\delta$  205.4, 190.0, 172.1, 137.2, 134.8, 132.6, 132.4, 131.6, 131.1, 129.1(6), 129.1(1), 128.8(7), 128.8(5), 128.3, 128.1, 113.1, 111.3, 51.7, 31.9, 28.0; IR (neat): 3058, 2950, 1922, 1736, 1653, 1438, 1260  $\text{cm}^{-1}$ ; HRMS (ESI):  $m/z$  calcd for  $\text{C}_{26}\text{H}_{23}\text{O}_3\text{S}_2$   $[\text{M}+\text{H}]^+$  447.1083 Found 447.1087.

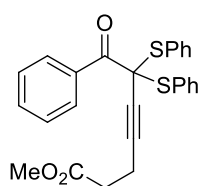

Methyl 7-oxo-7-phenyl-6,6-bis(phenylthio)hept-4-ynoate (**4i**): 14 mg (3%), yellow oil;  $^1\text{H}$  NMR ( $\text{CDCl}_3$ , 600 MHz):  $\delta$  8.28 – 8.25 (m, 2H), 7.57 – 7.53 (m, 5H), 7.42 – 7.38 (m, 4H), 7.33 – 7.30 (m, 4H), 3.62 (s, 3H), 2.38 – 2.34 (m, 2H), 2.22 – 2.19 (m, 2H);  $^{13}\text{C}$  NMR ( $\text{CDCl}_3$ , 150 MHz):  $\delta$  189.3, 171.8, 136.7, 134.2, 132.9, 131.3, 130.6, 129.8, 128.4, 127.7, 94.6, 76.7, 67.1, 51.7, 32.3, 14.8; IR (neat): 3058, 2950, 2922, 1738, 1681, 1438, 1228, 1172  $\text{cm}^{-1}$ ; HRMS (ESI):  $m/z$  calcd for  $\text{C}_{26}\text{H}_{23}\text{O}_3\text{S}_2$   $[\text{M}+\text{H}]^+$  447.1083 Found 447.1088.

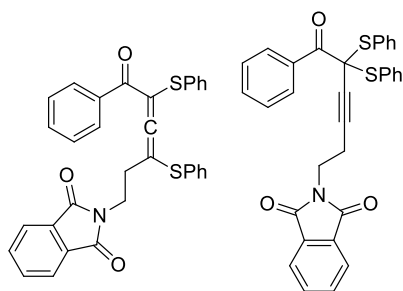

A mixture of **3j** and **4j** was isolated with a 13:1 ratio in 486 mg (91%).

2-(6-Oxo-6-phenyl-3,5-bis(phenylthio)hexa-3,4-dienyl)isoindoline-1,3-dione (**3j**): yellow oil;  $^1\text{H}$  NMR ( $\text{CDCl}_3$ , 600 MHz):  $\delta$  7.79 – 7.73 (m, 3H), 7.72 – 7.64 (m, 4H), 7.51 (t,  $J = 7.3$  Hz, 1H), 7.44 (d,  $J = 6.2$  Hz, 2H), 7.40 – 7.36 (m, 4H), 7.26 (t,  $J = 7.1$  Hz, 1H), 7.20 (t,  $J = 7.4$  Hz,

2H), 7.03 (d,  $J = 7.5$  Hz, 2H), 3.55 – 3.45 (m, 2H), 2.46 – 2.25 (m, 2H);  $^{13}\text{C}$  NMR ( $\text{CDCl}_3$ , 150 MHz):  $\delta$  205.7, 190.1, 167.7, 137.3, 134.5, 134.2, 133.9, 132.9, 132.5, 131.9, 129.2, 129.1, 128.8, 128.7, 128.5, 128.1, 123.5, 123.2, 112.9, 109.2, 35.8, 31.3; 2-(6-Oxo-6-phenyl-5,5-bis(phenylthio)hex-3-ynyl)isoindoline-1,3-dione (**4j**):  $^1\text{H}$  NMR ( $\text{CDCl}_3$ , 600 MHz):  $\delta$  8.27 – 8.23 (m, 2H), 7.88 – 7.84 (m, 2H), 7.83 – 7.80 (m, 2H), 7.79 – 7.73 (m, 2H), 7.72 – 7.65 (m, 2H), 7.56 – 7.48 (m, 4H), 7.32 – 7.28 (m, 1H), 7.25 (t,  $J = 7.1$  Hz, 4H), 3.55 – 3.47 (m, 2H), 2.46 – 2.25 (m, 2H); IR (neat): 3058, 3021, 2943, 1922, 1772, 1715, 1439, 1395, 1364  $\text{cm}^{-1}$ ; HRMS (ESI):  $m/z$  calcd for  $\text{C}_{32}\text{H}_{23}\text{NO}_3\text{S}_2$  [ $\text{M}+\text{H}$ ] $^+$  534.1192 Found 534.1186

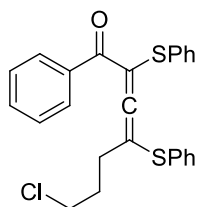

7-Chloro-1-phenyl-2,4-bis(phenylthio)hepta-2,3-dien-1-one (**3k**): 230 mg (53%), yellow oil;

$^1\text{H}$  NMR ( $\text{CDCl}_3$ , 600 MHz)  $\delta$  7.68 – 7.66 (m, 2H), 7.56 – 7.53 (m, 1H), 7.48 – 7.45 (m, 2H), 7.42 – 7.36 (m, 5H), 7.28 – 7.25 (m, 1H), 7.22 – 7.18 (m, 2H), 7.02 – 6.99 (m, 2H), 3.17 – 3.09 (m, 2H), 2.17 – 2.09 (m, 2H), 1.68 – 1.54 (m, 2H);  $^{13}\text{C}$  NMR ( $\text{CDCl}_3$ , 151 MHz):

$\delta$  205.8, 190.5, 137.5, 134.6, 132.7, 132.5, 131.6, 131.0, 129.1(6), 129.1(2), 128.8, 128.7, 128.4, 128.1, 112.7, 111.4, 43.3, 30.1, 29.8; IR (neat): 3058, 2956, 1920, 1655, 1476, 1439, 1262, 1064  $\text{cm}^{-1}$ ; HRMS (ESI):  $m/z$  calcd for  $\text{C}_{25}\text{H}_{22}\text{ClOS}_2$  [ $\text{M}+\text{H}$ ] $^+$  437.0795 Found 437.0804.

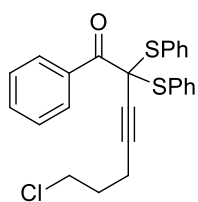

7-Chloro-1-phenyl-2,2-bis(phenylthio)hept-3-yn-1-one (**4k**): 32 mg (7%), yellow oil;  $^1\text{H}$

NMR ( $\text{CDCl}_3$ , 600 MHz):  $\delta$  8.30 – 8.27 (m, 2H), 7.58 – 7.53 (m, 5H), 7.43 – 7.38 (m, 4H), 7.32 (t,  $J = 7.6$  Hz, 4H), 3.22 (t,  $J = 6.4$  Hz, 2H), 2.23 (t,  $J = 6.7$  Hz, 2H), 1.66 – 1.61 (m, 2H);  $^{13}\text{C}$  NMR ( $\text{CDCl}_3$ , 150 MHz):  $\delta$  189.5, 136.7, 134.3, 132.9, 131.3, 130.5, 129.8, 128.5,



127.7, 94.6, 76.7, 67.1, 43.2, 30.5, 16.3; IR (neat): 3058, 2957, 2923, 2850, 2232, 1680, 1472, 1438, 1227  $\text{cm}^{-1}$ ;

HRMS (ESI):  $m/z$  calcd for  $\text{C}_{25}\text{H}_{22}\text{ClOS}_2$   $[\text{M}+\text{H}]^+$  437.0795 Found 437.0805.

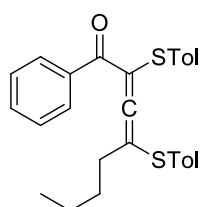

2,4-Bis(p-tolylthio)-1-phenylocta-2,3-dien-1-one (**3l**): 233 mg (53%), yellow oil;  $^1\text{H}$  NMR

( $\text{CDCl}_3$ , 600 MHz):  $\delta$  7.66 – 7.62 (m, 2H), 7.53 – 7.49 (m, 1H), 7.37 (t,  $J = 7.8$  Hz, 2H),

7.32 (d,  $J = 8.1$  Hz, 2H), 7.15 (d,  $J = 7.9$  Hz, 2H), 7.00 (d,  $J = 8.0$  Hz, 2H), 6.93 (d,  $J = 8.1$

Hz, 2H), 2.37 (s, 3H), 2.31 (s, 3H), 1.95 (t,  $J = 7.5$  Hz, 2H), 1.20 – 1.05 (m, 2H), 1.02 –

0.95 (m, 2H), 0.71 (t,  $J = 7.3$  Hz, 3H);  $^{13}\text{C}$  NMR ( $\text{CDCl}_3$ , 150 MHz):  $\delta$  205.6, 190.8, 138.6, 138.5, 137.7, 134.6,

133.1, 132.2, 129.7(4), 129.7(2), 128.8, 128.3, 127.9, 127.8, 113.7, 112.6, 32.5, 29.6, 21.7, 21.2(9), 21.2(2), 13.7;

IR (neat): 3021, 2956, 2926, 2869, 1918, 1654, 1596, 1491, 1446, 1262, 1062  $\text{cm}^{-1}$ ; HRMS (ESI):  $m/z$  calcd for

$\text{C}_{28}\text{H}_{29}\text{OS}_2$   $[\text{M}+\text{H}]^+$  445.1654 Found 445.1661.

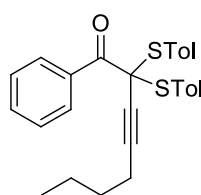

2,2-Bis(p-tolylthio)-1-phenyloct-3-yn-1-one (**4l**): 75 mg (17%), yellow oil;  $^1\text{H}$  NMR

( $\text{CDCl}_3$ , 600 MHz):  $\delta$  8.32 – 8.29 (m, 2H), 7.53 – 7.49 (m, 1H), 7.45 (d,  $J = 8.0$  Hz, 4H),

7.38 (t,  $J = 7.6$  Hz, 2H), 7.12 – 7.09 (m, 4H), 2.34 (s, 6H), 2.06 (t,  $J = 7.0$  Hz, 2H), 1.24 –

1.19 (m, 2H), 1.15 – 1.09 (m, 2H), 0.78 (t,  $J = 7.3$  Hz, 3H);  $^{13}\text{C}$  NMR ( $\text{CDCl}_3$ , 150 MHz):  $\delta$

189.7, 139.9, 136.8, 134.5, 132.7, 130.7, 129.2, 127.9, 127.6, 96.7, 76.1, 67.6, 29.9, 21.7, 21.3, 18.7, 13.5; IR

(neat): 3021, 2956, 2929, 2870, 2230, 1680, 1596, 1490, 1446, 1227, 1180, 1018  $\text{cm}^{-1}$ ; HRMS (ESI):  $m/z$  calcd

for  $\text{C}_{28}\text{H}_{29}\text{OS}_2$   $[\text{M}+\text{H}]^+$  445.1654 Found 445.1660.

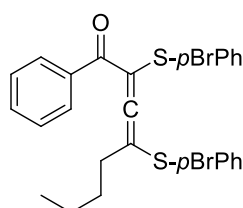

2,4-Bis(4-bromophenylthio)-1-phenylocta-2,3-dien-1-one (**3m**): 377 mg (66%), yellow

oil;  $^1\text{H}$  NMR ( $\text{CDCl}_3$ , 600 MHz):  $\delta$  7.69 – 7.64 (m, 2H), 7.56 – 7.52 (m, 1H), 7.48 –

7.44 (m, 2H), 7.40 (t,  $J = 7.8$  Hz, 2H), 7.32 – 7.25 (m, 4H), 6.86 – 6.83 (m, 2H), 2.04 –

1.96 (m, 2H), 1.22 – 1.08 (m, 2H), 1.04 – 0.97 (m, 2H), 0.74 (t,  $J = 7.3$  Hz, 3H);  $^{13}\text{C}$

NMR ( $\text{CDCl}_3$ , 150 MHz):  $\delta$  206.2, 190.1, 137.3, 135.7, 133.8, 132.6, 132.2(5), 132.2(2), 131.2, 130.7, 128.7,

128.1, 123.0, 122.5, 112.4, 111.3, 32.5, 29.5, 21.7, 13.7; IR (neat): 2956, 2929, 2870, 1919, 1654, 1471, 1446,

1263, 1067  $\text{cm}^{-1}$ ; HRMS (ESI):  $m/z$  calcd for  $\text{C}_{26}\text{H}_{23}\text{Br}_2\text{OS}_2$   $[\text{M}+\text{H}]^+$  572.9551 Found 572.9561.

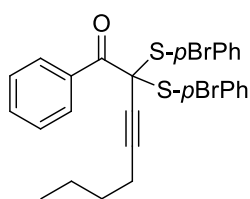

2,2-Bis(4-bromophenylthio)-1-phenyloct-3-yn-1-one (**4m**): 52 mg (18%); yellow oil;

$^1\text{H}$  NMR ( $\text{CDCl}_3$ , 600 MHz):  $\delta$  8.29 – 8.25 (m, 2H), 7.57 – 7.53 (m, 1H), 7.45 – 7.43 (m, 4H), 7.41 – 7.38 (m, 6H), 2.08 (t,  $J = 7.0$  Hz, 2H), 1.26 – 1.22 (m, 2H), 1.18 – 1.11 (m, 2H), 0.81 (t,  $J = 7.3$  Hz, 3H);  $^{13}\text{C}$  NMR ( $\text{CDCl}_3$ , 150 MHz):  $\delta$  189.1, 138.0, 134.0,

133.1, 131.7, 130.6, 130.3, 127.8, 124.7, 97.8, 75.5, 67.7, 29.8, 21.7, 18.7, 13.5 ; IR (neat): 3064, 2956, 2930, 2870, 2228, 1679, 1471, 1384, 1228, 1068  $\text{cm}^{-1}$ ; HRMS (ESI):  $m/z$  calcd for  $\text{C}_{26}\text{H}_{23}\text{Br}_2\text{OS}_2$  [ $\text{M}+\text{H}$ ] $^+$  572.9551 Found 572.9560.

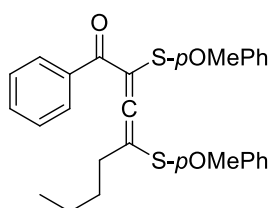

2,4-Bis(4-methoxyphenylthio)-1-phenylocta-2,3-dien-1-one (**3n**): 228 mg (48%),

yellow oil;  $^1\text{H}$  NMR ( $\text{CDCl}_3$ , 600 MHz):  $\delta$  7.65 – 7.62 (m, 2H), 7.51 (t,  $J = 7.4$  Hz, 1H), 7.39 – 7.35 (m, 4H), 6.98 – 6.95 (m, 2H), 6.90 – 6.87 (m, 2H), 6.74 – 6.71 (m, 2H), 3.82 (s, 3H), 3.78 (s, 3H), 1.92 (t,  $J = 7.5$  Hz, 2H), 1.21 – 1.07 (m, 2H), 1.04 –

0.97 (m, 2H), 0.73 (t,  $J = 7.3$  Hz, 3H);  $^{13}\text{C}$  NMR ( $\text{CDCl}_3$ , 150 MHz):  $\delta$  204.5, 190.8, 190.8, 160.3, 160.1, 137.6, 136.8, 135.5, 132.2, 128.7, 127.8, 122.2, 121.5, 115.1, 114.5, 113.9, 55.3(6), 55.3(2), 32.5, 29.6, 21.8, 13.7; IR (neat): 2956, 2931, 2870, 2360, 1651, 1591, 1493, 1462, 1288, 1247, 1172  $\text{cm}^{-1}$ ; HRMS (ESI):  $m/z$  calcd for  $\text{C}_{28}\text{H}_{29}\text{O}_3\text{S}_2$  [ $\text{M}+\text{H}$ ] $^+$  477.1552 Found 477.1557.

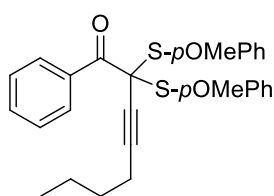

2,2-Bis(4-methoxyphenylthio)-1-phenyloct-3-yn-1-one (**4n**): 76 mg (16%), yellow

oil;  $^1\text{H}$  NMR ( $\text{CDCl}_3$ , 600 MHz)  $\delta$  8.32 – 8.27 (m, 2H), 7.54 – 7.51 (m, 1H), 7.50 – 7.47 (m, 4H), 7.39 (t,  $J = 7.9$  Hz, 2H), 6.85 – 6.82 (m, 4H), 3.80 (s, 6H), 2.07 (t,  $J =$

7.0 Hz, 2H), 1.27 – 1.22 (m, 2H), 1.17 – 1.11 (m, 2H), 0.79 (t,  $J = 7.3$  Hz, 3H);  $^{13}\text{C}$  NMR ( $\text{CDCl}_3$ , 151 MHz):  $\delta$  190.0, 161.0, 138.7, 134.6, 132.7, 130.6, 127.6, 122.2, 113.9, 96.8, 76.1, 67.9, 55.2, 29.9, 21.7, 18.7, 13.4; IR (neat): 2956, 2931, 2870, 2359, 2341, 1678, 1590, 1492, 1288, 1249, 1172  $\text{cm}^{-1}$ ; HRMS (ESI):  $m/z$  calcd for  $\text{C}_{28}\text{H}_{29}\text{O}_3\text{S}_2$  [ $\text{M}+\text{H}$ ] $^+$  477.1552 Found 477.1560.

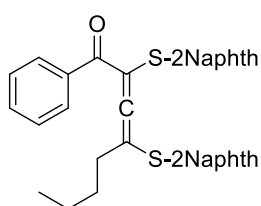

2,4-Bis(naphthalen-2-ylthio)-1-phenylocta-2,3-dien-1-one (**3o**): 256 mg (50%),

yellow oil;  $^1\text{H}$  NMR ( $\text{CDCl}_3$ , 600 MHz)  $\delta$  7.95 – 7.93 (s, 1H), 7.83 – 7.81 (m, 1H), 7.77 – 7.68 (m, 5H), 7.56 – 7.47 (m, 5H), 7.46 – 7.41 (m, 4H), 7.39 – 7.35 (m, 2H),

6.87 (dd,  $J = 8.5, 1.8$  Hz, 1H), 1.98 – 1.90 (m, 2H), 1.14 – 0.99 (m, 2H), 0.90 – 0.84 (m, 2H), 0.58 (t,  $J = 7.3$  Hz, 3H);  $^{13}\text{C}$  NMR ( $\text{CDCl}_3$ , 150 MHz):  $\delta$  206.6, 190.6, 137.5, 133.6, 133.5(7), 133.5(6), 133.3, 132.9, 132.5, 132.4, 131.4, 130.8, 129.4, 129.2, 128.9, 128.8, 128.5, 128.0, 127.7(8), 127.7(3), 127.7(2), 127.4, 126.7, 126.6(4), 126.6(2), 126.5, 112.4, 111.4, 32.6, 29.5, 21.6, 13.5; IR (neat): 3053, 2956, 2928, 1918, 1654, 1500, 1340, 1264  $\text{cm}^{-1}$ ; HRMS (ESI):  $m/z$  calcd for  $\text{C}_{34}\text{H}_{29}\text{OS}_2$   $[\text{M}+\text{H}]^+$  517.1654 Found 517.1664.

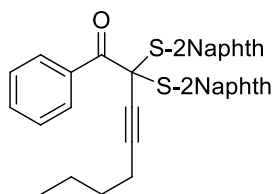

2,2-Bis(naphthalen-2-ylthio)-1-phenyloct-3-yn-1-one (**4o**): 83 mg (16%), yellow oil;

$^1\text{H}$  NMR ( $\text{CDCl}_3$ , 600 MHz):  $\delta$  8.33 – 8.28 (m, 2H), 8.06 (s, 2H), 7.82 (d,  $J = 8.0$  Hz, 2H), 7.77 – 7.74 (m, 4H), 7.67 – 7.64 (m, 2H), 7.53 – 7.46 (m, 5H), 7.39 – 7.35 (m, 2H), 1.94 (t,  $J = 7.0$  Hz, 2H), 1.06 – 0.99 (m, 2H), 0.96 – 0.91 (m, 2H), 0.58 (t,  $J =$

7.3 Hz, 3H);  $^{13}\text{C}$  NMR ( $\text{CDCl}_3$ , 150 MHz):  $\delta$  189.7, 137.1, 134.5, 133.6, 133.2, 132.9, 132.8, 130.7, 128.9, 128.1, 127.8, 127.7, 127.6, 127.0, 126.2, 97.5, 76.0, 67.9, 29.7, 21.6, 18.7, 13.3; IR (neat): 3053, 2956, 2928, 2869, 2359, 1676, 1226  $\text{cm}^{-1}$ ; HRMS (ESI):  $m/z$  calcd for  $\text{C}_{34}\text{H}_{29}\text{OS}_2$   $[\text{M}+\text{H}]^+$  517.1654 Found 517.1661.

#### General Procedure for Synthesis of Furan via 1,2-Sulfur Migration.

To a suspension of  $\text{CuCl}$  (0.02 mmol, 10 mol%, 2 mg) in dry dichloromethane (0.5 mL) was added  $\alpha, \gamma$ -dithio allenyl and  $\alpha, \alpha$ -dithio propargyl ketones (0.2 mmol) under argon at ambient temperature. The resulting solution was stirred for 1-2 h at this temperature, after which it was concentrated under reduced pressure and purified by column chromatography on silica gel (10-20% dichloromethane in hexanes) to give the desired products.

#### Characterization Data of the Compounds in Scheme 4.

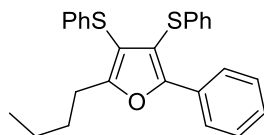

2-Butyl-5-phenyl-3,4-bis(phenylthio)furan (**9a**): 67 mg (81%), white solid, m.p. 50-

53  $^\circ\text{C}$ ;  $^1\text{H}$  NMR ( $\text{CDCl}_3$ , 600 MHz):  $\delta$  8.07 (d,  $J = 7.8$  Hz, 2H), 7.36 (t,  $J = 7.7$  Hz, 2H), 7.28 (t,  $J = 7.4$  Hz, 1H), 7.13 – 6.96 (m, 10H), 2.86 (t,  $J = 7.6$  Hz, 2H), 1.72 –

1.65 (m, 2H), 1.40 – 1.33 (m, 2H), 0.91 (t,  $J = 7.4$  Hz, 3H);  $^{13}\text{C}$  NMR ( $\text{CDCl}_3$ , 150 MHz):  $\delta$  161.0, 154.9, 137.3, 136.7, 129.9, 128.7, 128.6, 128.5, 128.4, 126.7, 126.6, 125.9, 125.3, 125.2, 115.2, 113.2, 30.2, 26.7, 22.3, 13.8;

IR (neat): 3058, 2956, 2928, 2870, 1582, 1478, 1439, 1024  $\text{cm}^{-1}$ ; HRMS (ESI):  $m/z$  calcd for  $\text{C}_{26}\text{H}_{25}\text{OS}_2$   $[\text{M}+\text{H}]^+$  417.1341 Found 417.1303.

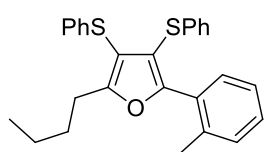

2-Butyl-3,4-bis(phenylthio)-5-o-tolylfuran (**9b**): 71 mg (83%), pale yellow oil;  $^1\text{H}$  NMR ( $\text{CDCl}_3$ , 600 MHz):  $\delta$  7.42 (d,  $J = 7.4$  Hz, 1H), 7.29 – 7.22 (m, 2H), 7.18 – 7.11 (m, 3H), 7.09 – 7.03 (m, 5H), 7.02 – 6.97 (m, 3H), 2.84 (t,  $J = 7.5$  Hz, 2H), 2.37 (s, 3H), 1.72 – 1.62 (m, 2H), 1.39 – 1.30 (m, 2H), 0.89 (t,  $J = 7.4$  Hz, 3H);  $^{13}\text{C}$  NMR ( $\text{CDCl}_3$ , 150 MHz):  $\delta$  161.3, 156.9, 137.6, 137.3, 137.2, 130.6, 130.4, 129.3, 129.2, 128.6, 128.5, 126.9, 126.7, 125.4, 125.3, 125.2, 114.8, 113.6, 30.2, 26.6, 22.2, 20.6, 13.7; IR (neat): 3058, 2956, 2927, 2870, 1582, 1477, 1439, 1084, 1024  $\text{cm}^{-1}$ ; HRMS (ESI):  $m/z$  calcd for  $\text{C}_{27}\text{H}_{25}\text{OS}_2$   $[\text{M}-\text{H}]^-$  429.1341 Found 429.1322.

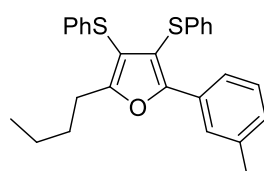

2-Butyl-3,4-bis(phenylthio)-5-m-tolylfuran (**9c**): 79 mg (92%), pale yellow oil;  $^1\text{H}$  NMR ( $\text{CDCl}_3$ , 600 MHz):  $\delta$  7.90 – 7.84 (m, 2H), 7.25 (t,  $J = 7.7$  Hz, 1H), 7.13 – 6.98 (m, 11H), 2.88 – 2.82 (m, 2H), 2.34 (s, 3H), 1.74 – 1.65 (m, 2H), 1.41 – 1.33 (m, 2H), 0.91 (t,  $J = 7.4$  Hz, 3H);  $^{13}\text{C}$  NMR ( $\text{CDCl}_3$ , 150 MHz):  $\delta$  160.9, 155.0, 138.0, 137.4, 136.8, 129.8, 129.2, 128.7, 128.6, 128.4, 126.7(7), 126.7(1), 126.5, 125.3, 125.2, 123.1, 115.1, 113.2, 30.2, 26.7, 22.3, 21.5, 13.8; IR (neat): 3057, 2956, 2927, 2870, 1582, 1477, 1439, 1082  $\text{cm}^{-1}$ ; HRMS (ESI):  $m/z$  calcd for  $\text{C}_{27}\text{H}_{25}\text{OS}_2$   $[\text{M}-\text{H}]^-$  429.1341 Found 429.1322.

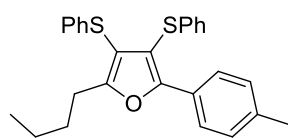

2-Butyl-3,4-bis(phenylthio)-5-p-tolylfuran (**9d**): 65 mg (76%), white solid, m.p. 57-58  $^{\circ}\text{C}$ ;  $^1\text{H}$  NMR ( $\text{CDCl}_3$ , 600 MHz):  $\delta$  7.97 – 7.93 (m, 2H), 7.18 (d,  $J = 8.1$  Hz, 2H), 7.12 – 7.07 (m, 4H), 7.07 – 7.00 (m, 6H), 2.85 (t,  $J = 7.8$  Hz, 2H), 2.35 (s, 3H), 1.73 – 1.64 (m, 2H), 1.42 – 1.33 (m, 2H), 0.91 (t,  $J = 7.4$  Hz, 3H);  $^{13}\text{C}$  NMR ( $\text{CDCl}_3$ , 150 MHz):  $\delta$  160.69, 155.2, 138.4, 137.3, 136.9, 129.1, 128.7, 128.5, 127.1, 126.7, 126.5, 125.8, 125.2, 125.2, 115.0, 112.2, 30.2, 26.6, 22.3, 21.3, 13.7; IR (neat): 3058, 2956, 2927, 2870, 1582, 1496, 1477, 1439, 1089, 1023  $\text{cm}^{-1}$ ; HRMS (ESI):  $m/z$  calcd for  $\text{C}_{27}\text{H}_{25}\text{OS}_2$   $[\text{M}-\text{H}]^-$  429.1341 Found 429.1322.

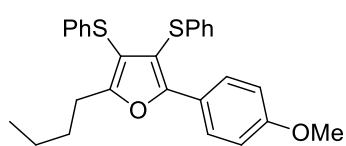

2-Butyl-5-(4-methoxyphenyl)-3,4-bis(phenylthio)furan (**9e**): 71 mg (80%), yellow oil;  $^1\text{H NMR}$  ( $\text{CDCl}_3$ , 600 MHz):  $\delta$  8.02 – 7.97 (m, 2H), 7.11 – 7.07 (m, 4H), 7.07 – 6.98 (m, 6H), 6.92 – 6.87 (m, 2H), 3.79 (s, 3H), 2.85 (t,  $J = 7.8$  Hz, 2H), 1.72 – 1.64 (m, 2H), 1.41 – 1.33 (m, 2H), 0.91 (t,  $J = 7.4$  Hz, 3H);  $^{13}\text{C NMR}$  ( $\text{CDCl}_3$ , 151 MHz):  $\delta$  160.3, 159.7, 155.2, 137.4, 137.0, 128.7, 128.6, 127.4, 126.7, 126.4, 125.2(1), 125.2(0), 122.8, 114.9, 113.9, 111.1, 55.2, 30.2, 26.6, 22.3, 13.7; IR (neat): 3058, 2956, 2928, 2870, 1609, 1581, 1496, 1252, 1178  $\text{cm}^{-1}$ ; HRMS (ESI):  $m/z$  calcd for  $\text{C}_{27}\text{H}_{26}\text{O}_2\text{S}_2$   $[\text{M}+\text{H}]^+$  447.1447 Found 447.1452.

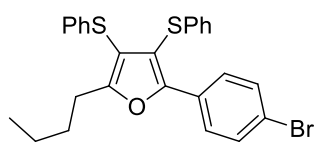

2-(4-Bromophenyl)-5-butyl-3,4-bis(phenylthio)furan (**9f**): 74 mg (75%), white solid, m.p. 80-84  $^\circ\text{C}$ ;  $^1\text{H NMR}$  ( $\text{CDCl}_3$ , 600 MHz):  $\delta$  7.97 – 7.93 (m, 2H), 7.50 – 7.46 (m, 2H), 7.12 – 7.07 (m, 4H), 7.06 – 7.00 (m, 6H), 2.85 (t,  $J = 7.2$  Hz, 2H), 1.71 – 1.65 (m, 2H), 1.41 – 1.33 (m, 2H), 0.91 (d,  $J = 7.4$  Hz, 3H);  $^{13}\text{C NMR}$  ( $\text{CDCl}_3$ , 150 MHz):  $\delta$  161.2, 153.7, 137.0, 136.2, 131.6, 128.8, 128.7, 128.6, 127.2, 126.8, 126.6, 125.5, 125.3, 122.4, 115.6, 114.0, 30.1, 26.6, 22.3, 13.7; IR (neat): 3058, 2956, 2927, 2870, 1742, 1581, 1477, 1438  $\text{cm}^{-1}$ ; MS (EI)  $m/z = 495.6$  ( $\text{M}^+$ ).

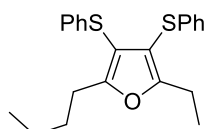

2-Butyl-5-ethyl-3,4-bis(phenylthio)furan (**9g**): 41 mg (56%), pale yellow oil;  $^1\text{H NMR}$  ( $\text{CDCl}_3$ , 600 MHz):  $\delta$  7.12 – 7.07 (m, 4H), 7.04 – 6.98 (m, 6H), 2.80 – 2.74 (m, 4H), 1.65 – 1.59 (m, 2H), 1.36 – 1.29 (m, 2H), 1.21 (t,  $J = 7.6$  Hz, 3H), 0.89 (t,  $J = 7.4$  Hz, 3H);  $^{13}\text{C NMR}$  ( $\text{CDCl}_3$ , 150 MHz):  $\delta$  161.1, 160.2, 137.6, 137.5, 128.5(6), 128.5(3), 126.7, 126.6, 125.1(1), 125.1(0), 112.2, 111.6, 30.2, 26.5, 22.2, 20.3, 13.7, 12.6; IR (neat): 3059, 2956, 2929, 2871, 1582, 1477, 1439, 1059, 1024  $\text{cm}^{-1}$ ; HRMS (ESI):  $m/z$  calcd for  $\text{C}_{22}\text{H}_{25}\text{OS}_2$   $[\text{M}+\text{H}]^+$  369.1341 Found 369.1356.

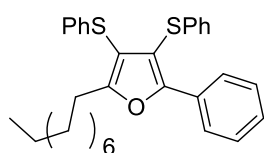

2-Nonyl-5-phenyl-3,4-bis(phenylthio)furan (**9h**): 88 mg (90%), pale yellow sticky oil;  $^1\text{H NMR}$  ( $\text{CDCl}_3$ , 600 MHz):  $\delta$  8.09 – 8.05 (m, 2H), 7.39 – 7.35 (m, 2H), 7.31 – 7.27 (m, 1H), 7.11 – 7.08 (m, 4H), 7.07 – 7.00 (m, 6H), 2.85 (t,  $J = 7.5$  Hz, 2H), 1.74 – 1.67 (m, 2H), 1.35 – 1.21 (m, 12H), 0.87 (t,  $J = 7.1$  Hz, 3H);  $^{13}\text{C NMR}$  ( $\text{CDCl}_3$ , 150 MHz):  $\delta$  161.0, 154.8,

137.3, 136.7, 129.8, 128.7, 128.5, 128.4, 128.3, 126.7, 126.5, 125.8, 125.2(8), 125.2(3), 115.2, 113.2, 31.8, 29.4, 29.2(5), 29.2(3), 29.1, 28.0, 26.9, 22.6, 14.1; IR (neat): 3059, 2925, 2853, 1582, 1478, 1439, 1024  $\text{cm}^{-1}$ ; HRMS (ESI):  $m/z$  calcd for  $\text{C}_{31}\text{H}_{35}\text{OS}_2$   $[\text{M}+\text{H}]^+$  487.2123 Found 487.2133.

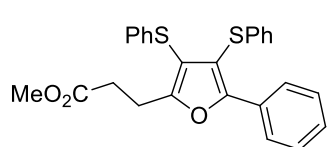

Methyl 3-(5-phenyl-3,4-bis(phenylthio)furan-2-yl)propanoate (**9i**): 71 mg

(79%), pale yellow solid, m.p. 65-66 °C;  $^1\text{H}$  NMR ( $\text{CDCl}_3$ , 600 MHz):  $\delta$  8.07 – 8.03 (m, 2H), 7.40 – 7.35 (m, 2H), 7.33 – 7.28 (m, 1H), 7.13 – 7.08 (m, 4H), 7.07 – 7.01 (m, 6H), 3.67 (s, 3H), 3.21 (t,  $J = 7.8$  Hz, 2H), 2.73 (t,  $J = 7.8$  Hz, 2H);  $^{13}\text{C}$  NMR ( $\text{CDCl}_3$ , 150 MHz):  $\delta$  172.4, 158.2, 155.3, 136.7, 136.4, 129.6, 128.7(8), 128.7(1), 128.6, 128.5, 126.9, 126.7, 125.9, 125.4(8), 125.4(2), 116.2, 113.5, 51.8, 32.1, 22.6; IR (neat): 3058, 2949, 1739, 1582, 1478, 1438, 1197, 1071  $\text{cm}^{-1}$ ; HRMS (ESI):  $m/z$  calcd for  $\text{C}_{26}\text{H}_{23}\text{O}_3\text{S}_2$   $[\text{M}+\text{H}]^+$  447.1083 Found 447.1099.

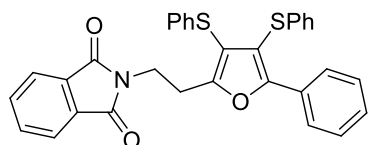

2-(2-(5-Phenyl-3,4-bis(phenylthio)furan-2-yl)ethyl)isoindoline-1,3-dione

(**9j**): 97 mg (91%), yellow solid, m.p. 122-123 °C;  $^1\text{H}$  NMR ( $\text{CDCl}_3$ , 600 MHz):  $\delta$  7.91 – 7.88 (m, 2H), 7.76 (dd,  $J = 5.4, 3.1$  Hz, 2H), 7.66 (dd,  $J = 5.5, 3.0$  Hz, 2H), 7.29 – 7.24 (m, 3H), 7.14 – 7.10 (m, 2H), 7.05 – 6.99 (m, 7H), 6.98 – 6.94 (m, 1H), 4.04 (t,  $J = 6.4$  Hz, 2H), 3.27 (t,  $J = 6.4$  Hz, 2H);  $^{13}\text{C}$  NMR ( $\text{CDCl}_3$ , 150 MHz):  $\delta$  167.9, 156.6, 155.9, 136.6(8), 136.6(4), 133.8, 132.0, 129.4, 128.7, 128.6, 128.5, 128.3, 126.8, 126.3, 125.9, 125.4, 125.2, 123.2, 117.6, 113.1, 36.3, 25.9; IR (neat): 3058, 1771, 1715, 1478, 1394  $\text{cm}^{-1}$ ; HRMS (ESI):  $m/z$  calcd for  $\text{C}_{32}\text{H}_{24}\text{NO}_3\text{S}_2$   $[\text{M}+\text{H}]^+$  534.1192 Found 534.1176.

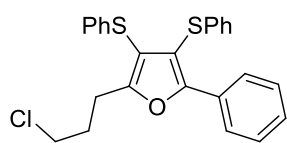

2-(3-Chloropropyl)-5-phenyl-3,4-bis(phenylthio)furan (**9k**): 81 mg (93%), yellow solid, m.p. 79-80 °C;  $^1\text{H}$  NMR ( $\text{CDCl}_3$ , 600 MHz):  $\delta$  8.08 – 8.05 (m, 2H), 7.40 – 7.35 (m, 2H), 7.33 – 7.28 (m, 1H), 7.13 – 7.08 (m, 4H), 7.08 – 7.01 (m, 6H), 3.56 (t,

$J = 6.5$  Hz, 2H), 3.05 – 3.00 (m, 2H), 2.20 – 2.14 (m, 2H);  $^{13}\text{C}$  NMR ( $\text{CDCl}_3$ , 150 MHz):  $\delta$  158.9, 155.3, 136.8, 136.49, 129.6, 128.8, 128.7, 128.6, 128.5, 126.9, 126.7, 125.9, 125.5, 125.4, 116.4, 113.5, 44., 30.9, 24.5; IR (neat): 3058, 2957, 1581, 1478, 1439, 1070, 1023  $\text{cm}^{-1}$ ; HRMS (ESI):  $m/z$  calcd for  $\text{C}_{25}\text{H}_{22}\text{ClOS}_2$   $[\text{M}+\text{H}]^+$  437.0795 Found 437.0782.

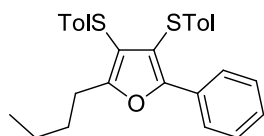

3,4-Bis(p-tolylthio)-2-butyl-5-phenylfuran (**9l**): 80 mg (90%), pale yellow solid, m.p. 71-72 °C;  $^1\text{H}$  NMR ( $\text{CDCl}_3$ , 600 MHz):  $\delta$  8.10 – 8.05 (m, 2H), 7.36 (t,  $J = 7.8$  Hz, 2H), 7.31 – 7.25 (m, 1H), 6.98 – 6.92 (m, 4H), 6.89 (d,  $J = 7.8$  Hz, 4H), 2.85 (t,  $J = 7.2$  Hz, 2H), 2.22 (d,  $J = 5.8$  Hz, 6H), 1.72 – 1.64 (m, 2H), 1.42 – 1.33 (m, 2H), 0.91 (t,  $J = 7.4$  Hz, 3H);  $^{13}\text{C}$  NMR ( $\text{CDCl}_3$ , 150 MHz):  $\delta$  160.7, 154.6, 135.1, 135.0, 133.6, 133.1, 130.0, 129.5, 129.3, 128.4, 128.3, 127.2, 126.9, 125.9, 115.8, 113.8, 30.2, 26.7, 22.3, 20.9(35), 20.9(31), 13.8; IR (neat): 3018, 2956, 2925, 2870, 1576, 1490, 1445, 1085, 1016  $\text{cm}^{-1}$ ; HRMS (ESI):  $m/z$  calcd for  $\text{C}_{28}\text{H}_{29}\text{OS}_2$   $[\text{M}+\text{H}]^+$  445.1654 Found 445.1633.

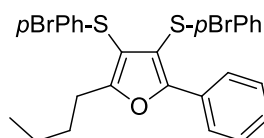

3,4-bis(4-bromophenylthio)-2-butyl-5-phenylfuran (**9m**): 99 mg (86%); white solid; m.p. 105-106 °C;  $^1\text{H}$  NMR ( $\text{CDCl}_3$ , 600 MHz):  $\delta$  8.06 – 8.02 (m, 2H), 7.38 (t,  $J = 7.6$  Hz, 2H), 7.34 – 7.30 (m, 1H), 7.20 – 7.16 (m, 4H), 6.87 – 6.83 (m, 4H), 2.86 (t,  $J = 7.6$  Hz, 2H), 1.73 – 1.67 (m, 2H), 1.42 – 1.34 (m, 2H), 0.93 (t,  $J = 7.4$  Hz, 3H);  $^{13}\text{C}$  NMR ( $\text{CDCl}_3$ , 151 MHz)  $\delta$  161.3, 155.3, 136.1, 135.5, 131.7, 131.6, 129.5, 128.7, 128.6, 128.4, 128.3, 125.8, 119.3, 119.2, 114.6, 112.5, 30.2, 26.6, 22.3, 13.7; IR (neat): 2956, 2928, 2870, 1576, 1471, 1385, 1069, 1007  $\text{cm}^{-1}$ ; HRMS (ESI):  $m/z$  calcd for  $\text{C}_{26}\text{H}_{23}\text{Br}_2\text{OS}_2$   $[\text{M}+\text{H}]^+$  572.9551 Found 572.9523

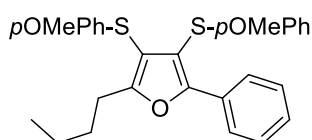

3,4-Bis(4-methoxyphenylthio)-2-butyl-5-phenylfuran (**9n**): 88 mg (92%); yellow solid; m.p. 59-60 °C;  $^1\text{H}$  NMR ( $\text{CDCl}_3$ , 600 MHz):  $\delta$  8.12 – 8.07 (m, 2H), 7.37 (t,  $J = 15.5$  Hz, 2H), 7.27 (s, 1H), 7.03 – 6.98 (m, 4H), 6.61 (d,  $J = 4.5$  Hz, 4H), 3.70 (s, 3H), 3.69 (s, 3H), 2.86 (t,  $J = 7.6$  Hz, 2H), 1.72 – 1.65 (m, 2H), 1.42 – 1.34 (m, 2H), 0.92 (t,  $J = 7.4$  Hz,

3H);  $^{13}\text{C}$  NMR ( $\text{CDCl}_3$ , 151 MHz)  $\delta$  160.3, 158.0, 158.0, 154.1, 130.1, 129.7, 129.2, 128.4, 128.2, 127.5, 127.1, 125.8, 116.6, 114.5, 114.4, 114.2, 55.2, 55.1, 30.3, 26.6, 22.3, 13.8; IR (neat): 2956, 2870, 2834, 1592, 1442, 1245, 1173, 1071, 1006  $\text{cm}^{-1}$ ; HRMS (ESI):  $m/z$  calcd for  $\text{C}_{28}\text{H}_{29}\text{O}_3\text{S}_2$   $[\text{M}+\text{H}]^+$  477.1552 Found 477.1532

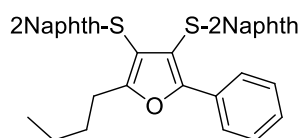

2-Butyl-4-(naphthalen-2-ylthio)-3-(naphthalen-3-ylthio)-5-phenylfuran (**9o**): 90 mg (87%); pale yellow sticky solid;  $^1\text{H}$  NMR ( $\text{CDCl}_3$ , 600 MHz):  $\delta$  8.13 (d,  $J = 8.0$  Hz, 2H), 7.49 (d,  $J = 7.4$  Hz, 2H), 7.40 – 7.34 (m, 8H), 7.29 – 7.21 (m, 5H),

7.15 – 7.07 (m, 2H), 2.92 (t,  $J = 7.5$  Hz, 2H), 1.78 – 1.71 (m, 2H), 1.44 – 1.36 (m, 2H), 0.91 (t,  $J = 7.4$  Hz, 3H);  $^{13}\text{C}$  NMR ( $\text{CDCl}_3$ , 151 MHz)  $\delta$  161.2, 155.2, 134.3, 133.9, 133.5, 133.4, 131.4(6), 131.4(4), 130.0, 128.6(5), 128.6(0), 128.3, 128.1, 127.5(6), 127.5(5), 126.8(7), 126.8(4), 126.2(3), 126.2(2), 126.0, 125.3, 125.2(3), 125.2(1), 125.1(5), 125.1(0), 124.7, 115.5, 113.3, 30.3, 26.8, 22.4, 13.8; IR (neat): 3052, 2956, 2928, 2870, 1624, 1590, 1501, 1484, 1132  $\text{cm}^{-1}$ ; HRMS (ESI):  $m/z$  calcd for  $\text{C}_{34}\text{H}_{29}\text{OS}_2$   $[\text{M}+\text{H}]^+$  517.1654 Found 517.1630

#### Characterization Data of the Additional Compounds.

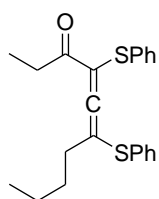

4,6-Bis(phenylthio)deca-4,5-dien-3-one (**3g**): yellow oil;  $^1\text{H}$  NMR ( $\text{CDCl}_3$ , 600 MHz):  $\delta$  8.35 – 8.27 (m, 8H), 8.24 – 8.20 (m, 2H), 3.58 – 3.40 (m, 2H), 3.06 (t,  $J = 7.6$  Hz, 2H), 2.32 – 2.21 (m, 4H), 2.03 (t,  $J = 7.4$  Hz, 3H), 1.84 (t,  $J = 7.2$  Hz, 3H);  $^{13}\text{C}$  NMR (151 MHz,  $\text{cdCl}_3$ )  $\delta$  202.82, 197.91, 136.57, 134.59, 133.84, 131.94, 131.13, 129.02, 128.85, 128.80, 128.76, 128.44,

115.19, 114.14, 32.90, 32.75, 30.00, 22.12, 13.72, 8.52; IR (neat): 3058, 2957, 2931, 2871, 1687, 1475, 1439, 1154  $\text{cm}^{-1}$ ; HRMS (ESI):  $m/z$  calcd for  $\text{C}_{22}\text{H}_{25}\text{OS}_2$   $[\text{M}+\text{H}]^+$  369.1341 Found 369.1337.

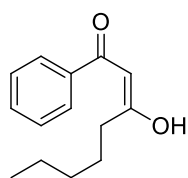

3-Hydroxy-1-phenyloct-2-en-1-one (**5a**): yellow oil;  $^1\text{H}$  NMR and  $^{13}\text{C}$  NMR spectra for this compound are consistent with the previously reported literature data.<sup>4</sup>  $^1\text{H}$  NMR ( $\text{CDCl}_3$ , 600 MHz):  $\delta$  7.90 – 7.86 (m, 2H), 7.52 (t,  $J = 7.0$  Hz, 1H), 7.45 (t,  $J = 7.7$  Hz, 2H), 6.17 (s, 1H),

2.42 (t,  $J = 7.2$  Hz, 2H), 1.73 – 1.66 (m, 2H), 1.40 – 1.32 (m, 4H), 0.91 (t,  $J = 6.9$  Hz, 3H);  $^{13}\text{C}$  NMR ( $\text{CDCl}_3$ , 151 MHz)  $\delta$  196.9, 183.4, 135.09, 132.1, 128.5, 126.9, 96.0, 39.2, 31.4, 25.5, 22.4, 13.9.



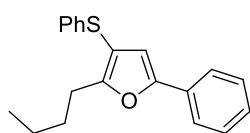

2-Butyl-5-phenyl-3-(phenylthio)furan (**6a**): colorless oil;  $^1\text{H}$  NMR and  $^{13}\text{C}$  NMR spectra for this compound are consistent with the previously reported literature data.<sup>5</sup>

$^1\text{H}$  NMR ( $\text{CDCl}_3$ , 600 MHz):  $\delta$  7.66 – 7.62 (m, 2H), 7.39 (t,  $J = 7.8$  Hz, 2H), 7.28 – 7.22 (m, 3H), 7.20 – 7.16 (m, 2H), 7.12 (t,  $J = 7.3$  Hz, 1H), 6.63 (s, 1H), 2.81 (t,  $J = 7.5$  Hz, 2H), 1.68 (m, 2H), 1.38 (m, 2H), 0.92 (t,  $J = 7.4$  Hz, 3H);  $^{13}\text{C}$  NMR ( $\text{CDCl}_3$ , 151 MHz)  $\delta$  160.2, 152.5, 138.1, 130.4, 128.8, 128.6, 127.4, 126.3, 125.1, 123.4, 110.3, 109.6, 30.4, 25.9, 22.2, 13.7.

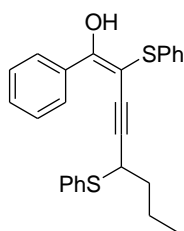

1-Phenyl-2,5-bis(phenylthio)oct-1-en-3-yn-1-ol (**10a**): yellow oil;  $^1\text{H}$  NMR ( $\text{CDCl}_3$ , 600 MHz):  $\delta$  7.94 – 7.90 (m, 2H), 7.38 – 7.33 (m, 4H), 7.30 – 7.26 (m, 1H), 7.25 – 7.20 (m, 5H), 7.14 – 7.09 (m, 3H), 6.02 (s, 1H), 4.20 (t,  $J = 7.5$  Hz, 1H), 2.04 – 1.88 (m, 2H), 1.58 – 1.44 (m, 2H), 0.94 (t,  $J = 7.4$  Hz, 3H);  $^{13}\text{C}$  NMR ( $\text{CDCl}_3$ , 151 MHz)  $\delta$  154.1, 153.4, 136.9, 133.8,

133.6, 130.0, 128.9, 128.7, 128.3, 127.9(9), 127.7(9), 126.8, 125.8, 125.5, 114.7, 109.3, 46.5, 35.3, 20.7, 13.6; IR (neat): 3057, 2957, 2930, 2870, 1582, 1478, 1438  $\text{cm}^{-1}$ ; HRMS (ESI):  $m/z$  calcd for  $\text{C}_{26}\text{H}_{24}\text{OS}_2$   $[\text{M}+\text{H}]^+$  417.1341 Found 417.1340

## References

- (a) Kim, H. Y.; Lee, S.; Kim, S.; Oh, K. *Org. Lett.* **2015**, *17*, 450–453. (b) Kim, H. Y.; Li, J.-Y.; Oh, K. *J. Org. Chem.* **2012**, *77*, 11132–11145. (c) Kim, H. Y.; Rooney, E. O.; Meury, R. P.; Oh, K. *Angew. Chem., Int. Ed.* **2013**, *52*, 8026.
- Henke, A.; Srogl, J. *J. Org. Chem.* **2008**, *73*, 7783–7784.
- Saravanan, P.; Anbarasan, P. *Org. Lett.* **2014**, *16*, 848–851
- Han, X.; Widenhoefer, R. A. *J. Org. Chem.* **2004**, *69*, 1738–1740.
- Dudnik, A.S.; Stromeck, A.W.; Rubina, M.; Kim, J. T.; Kel'in, A.V.; Gevorgyan, V. *J. Am. Chem. Soc.* **2008**, *130*, 1440–1452.

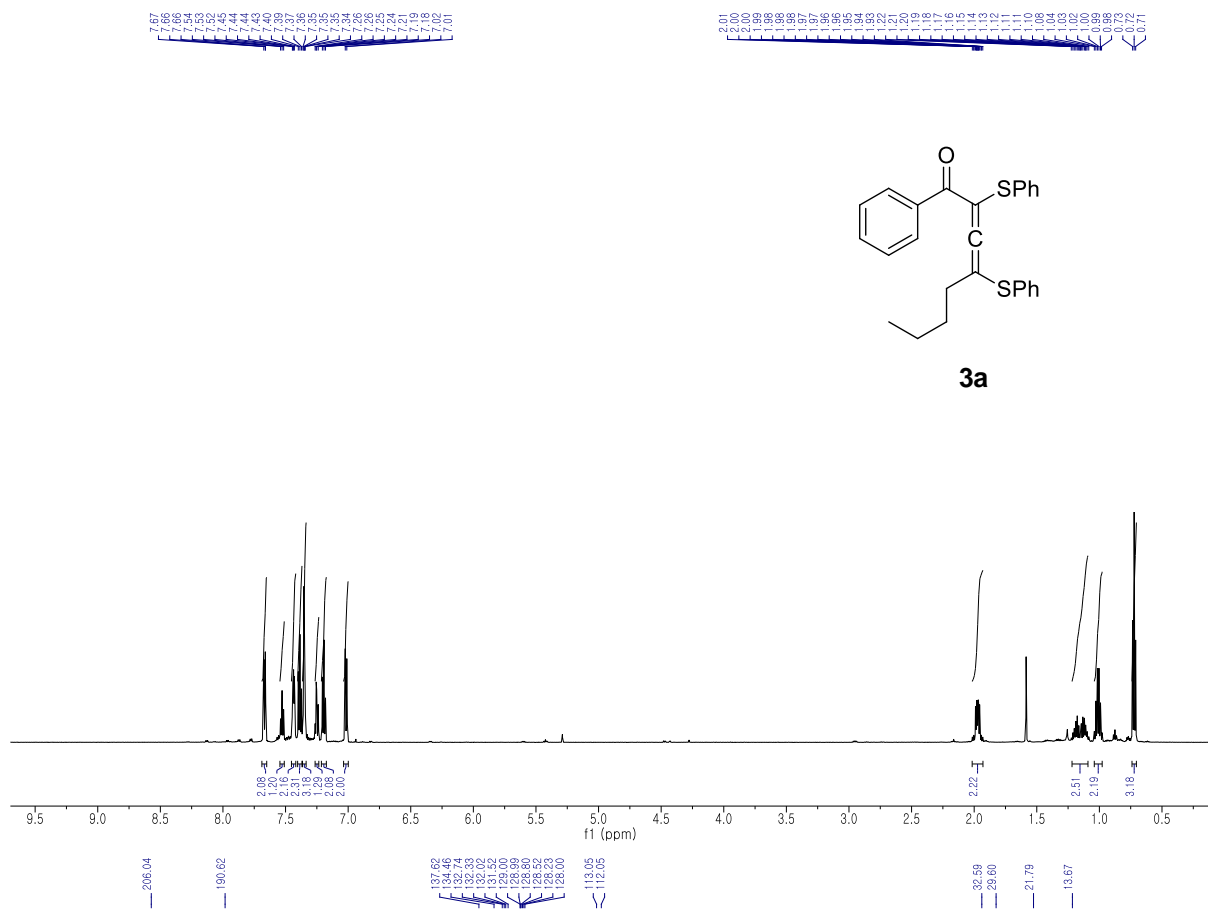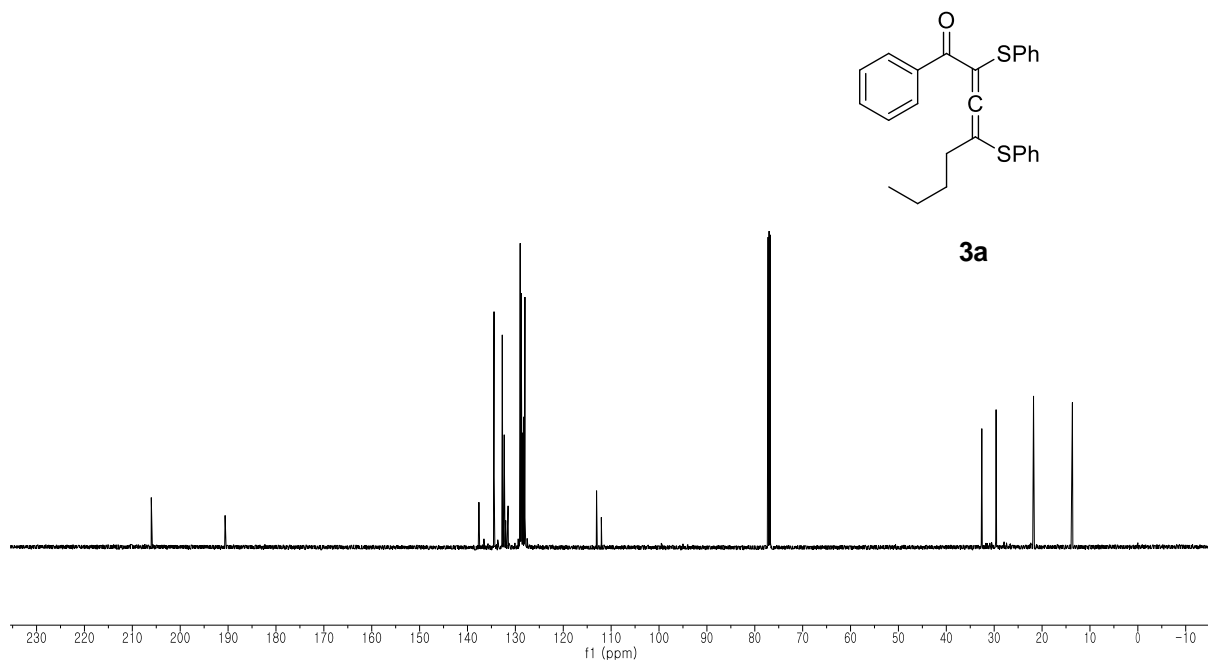

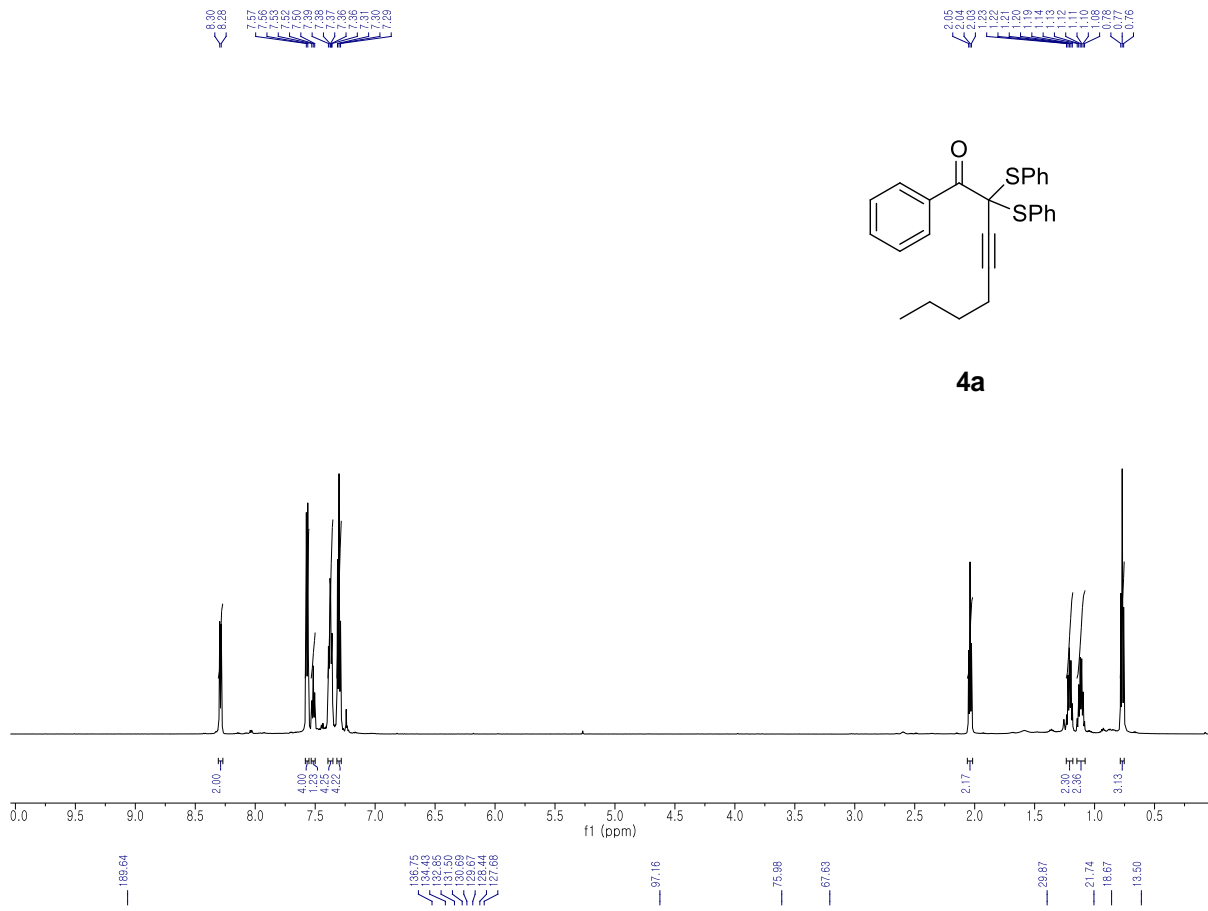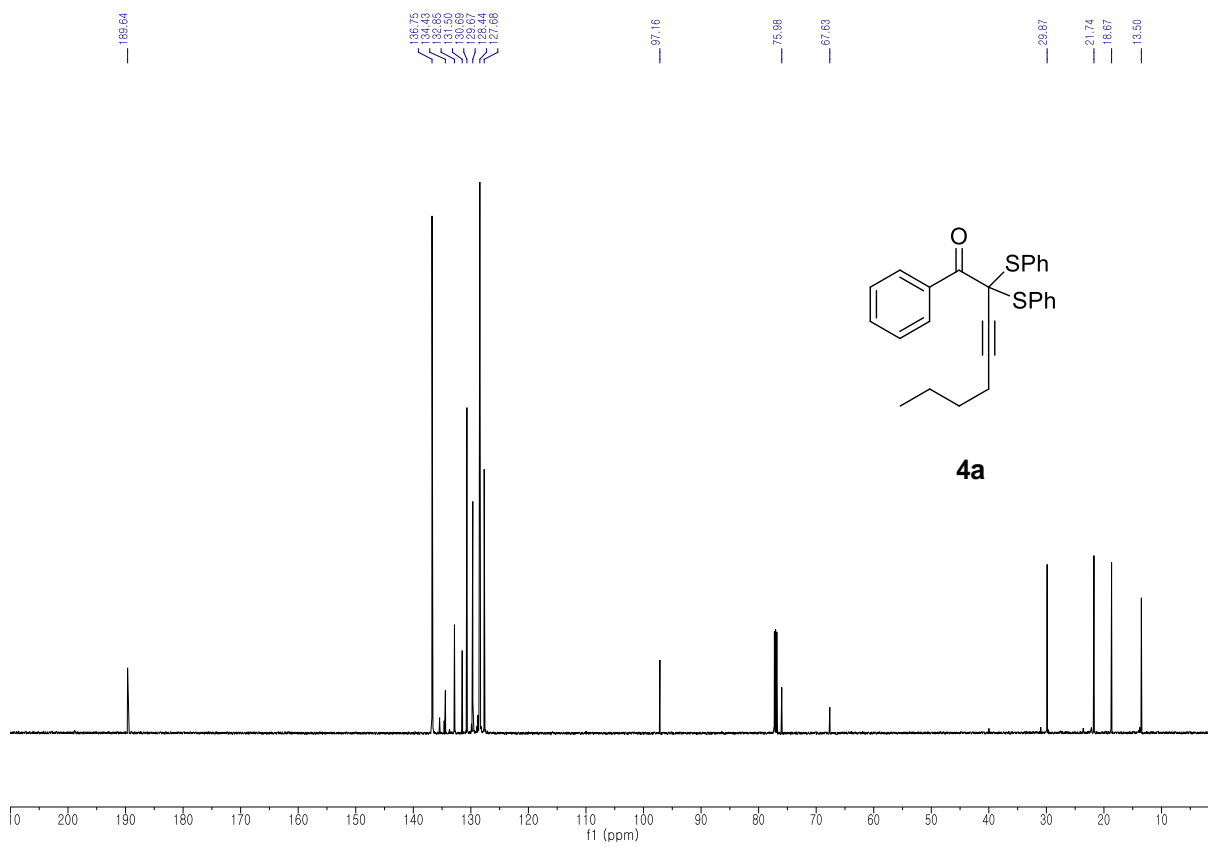

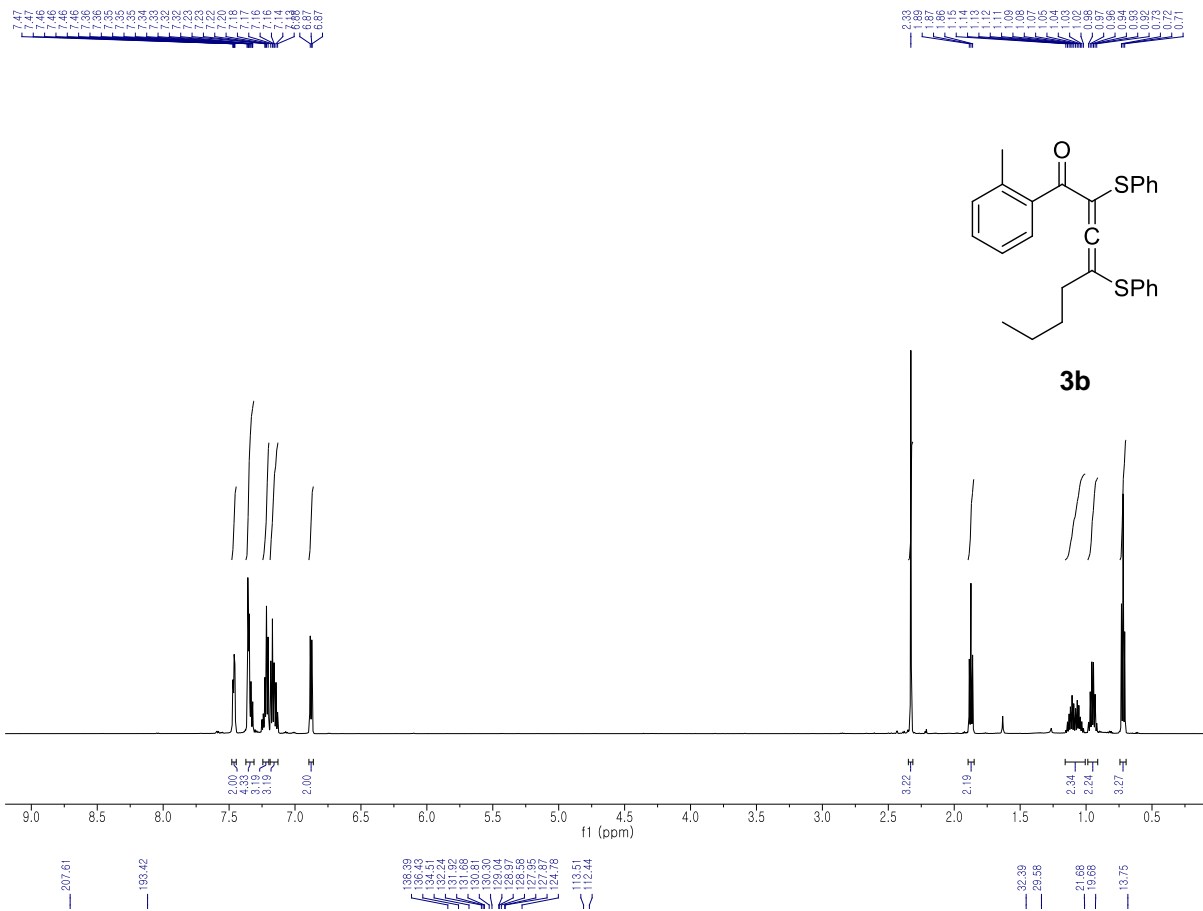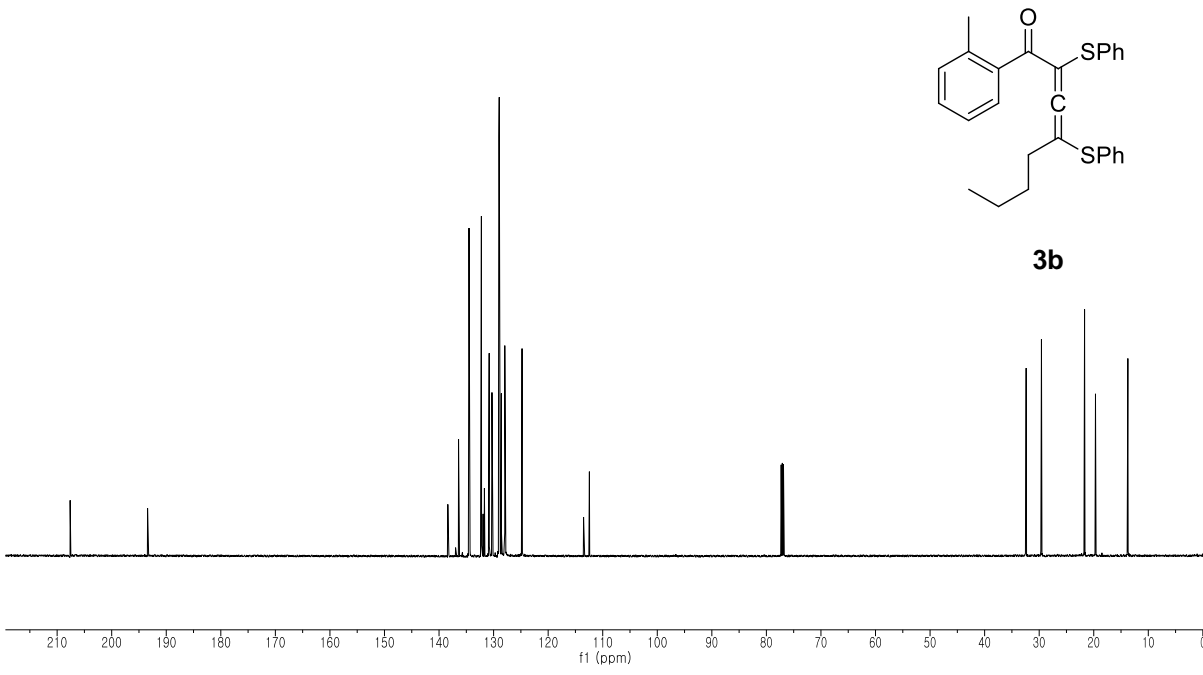

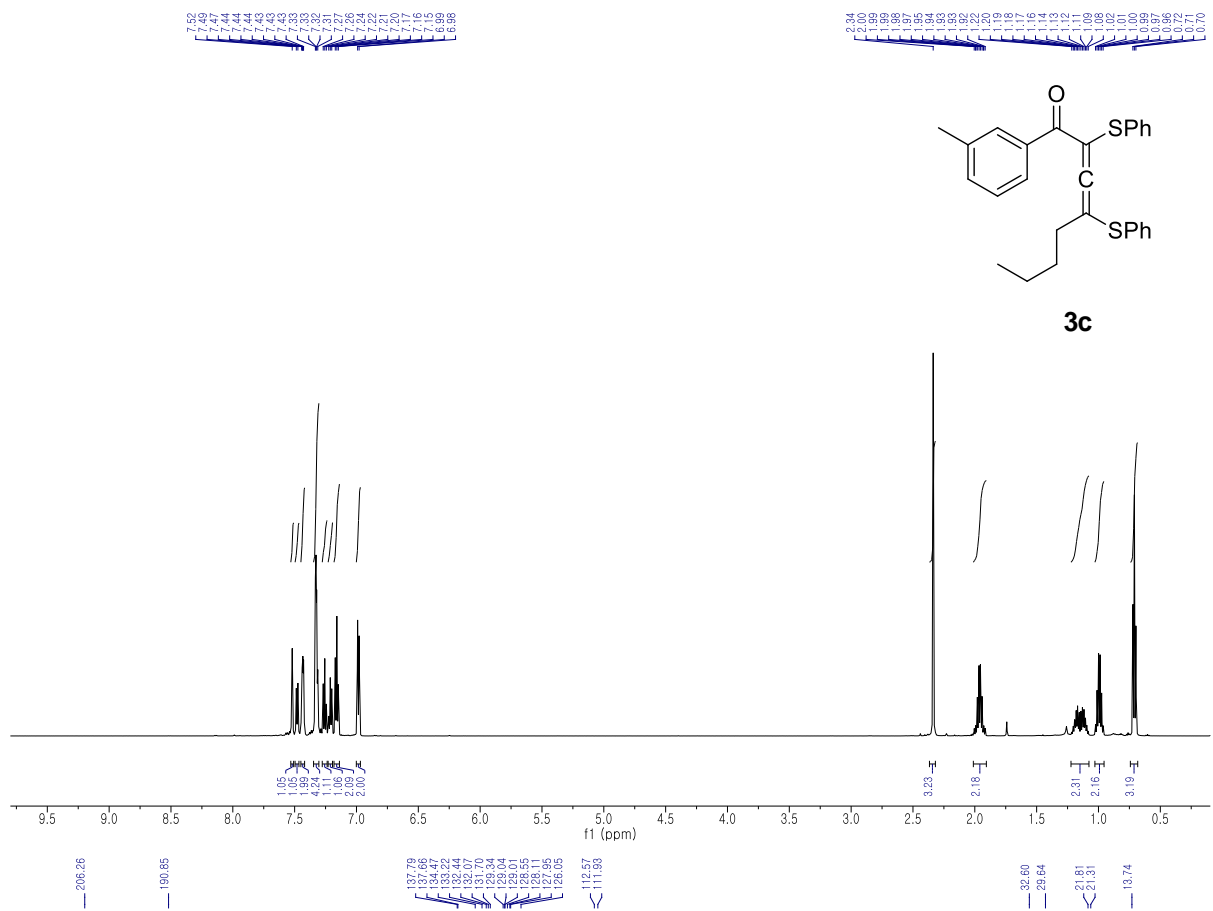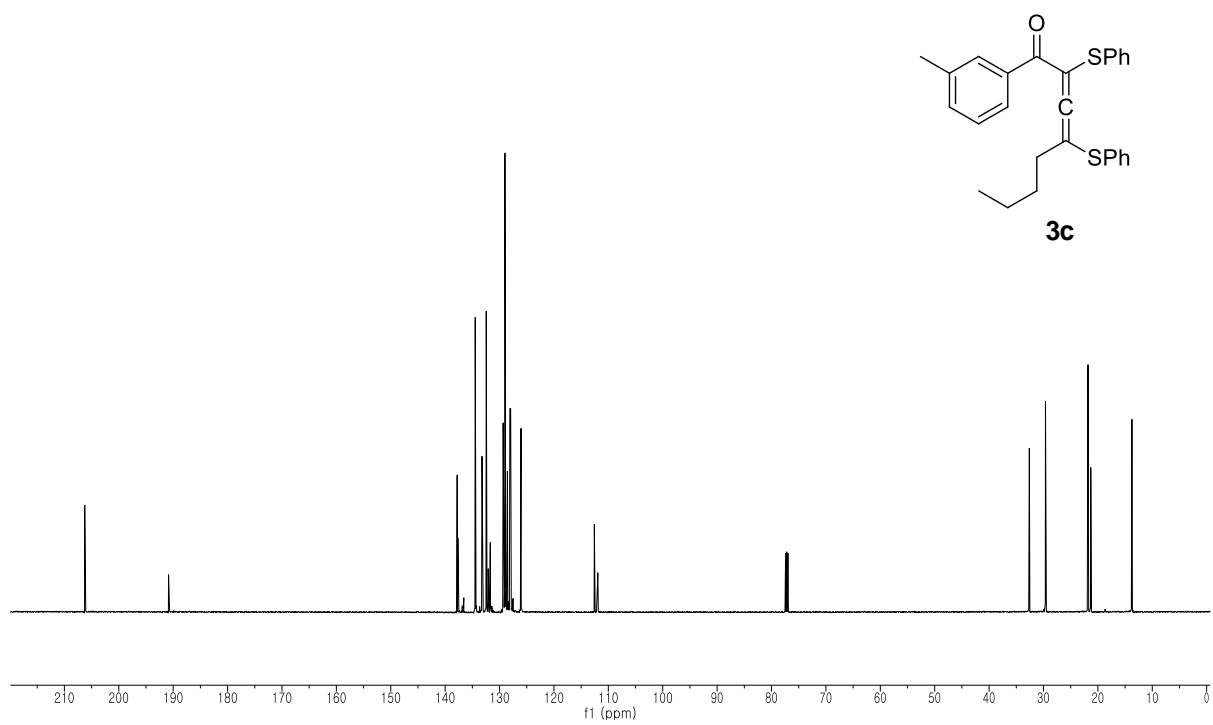

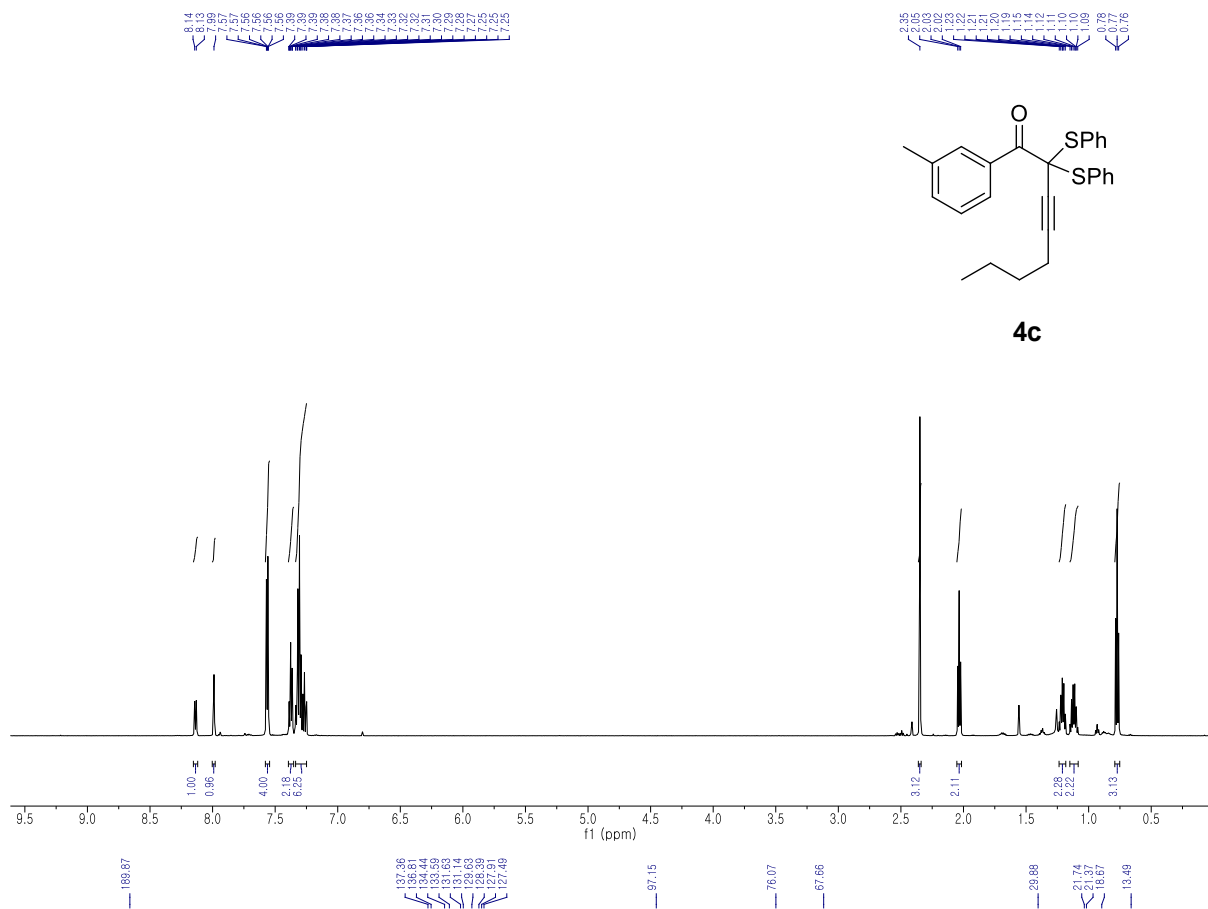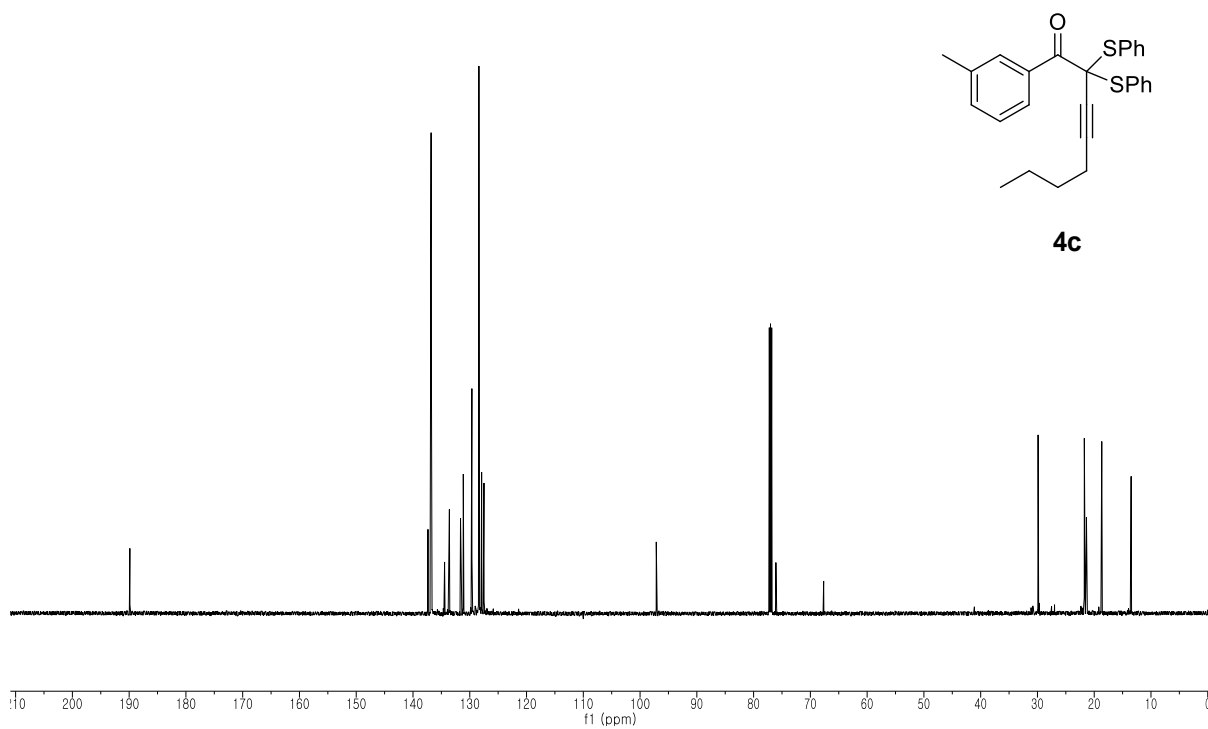

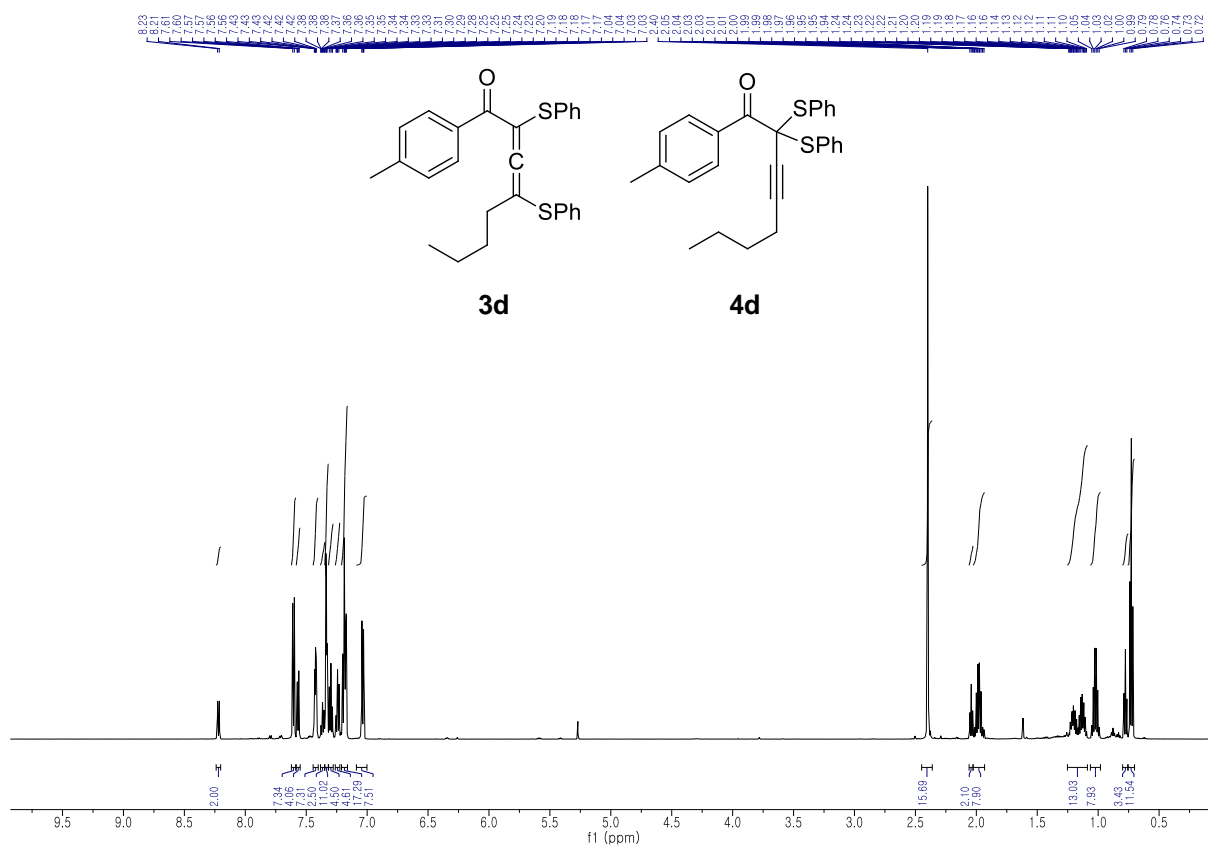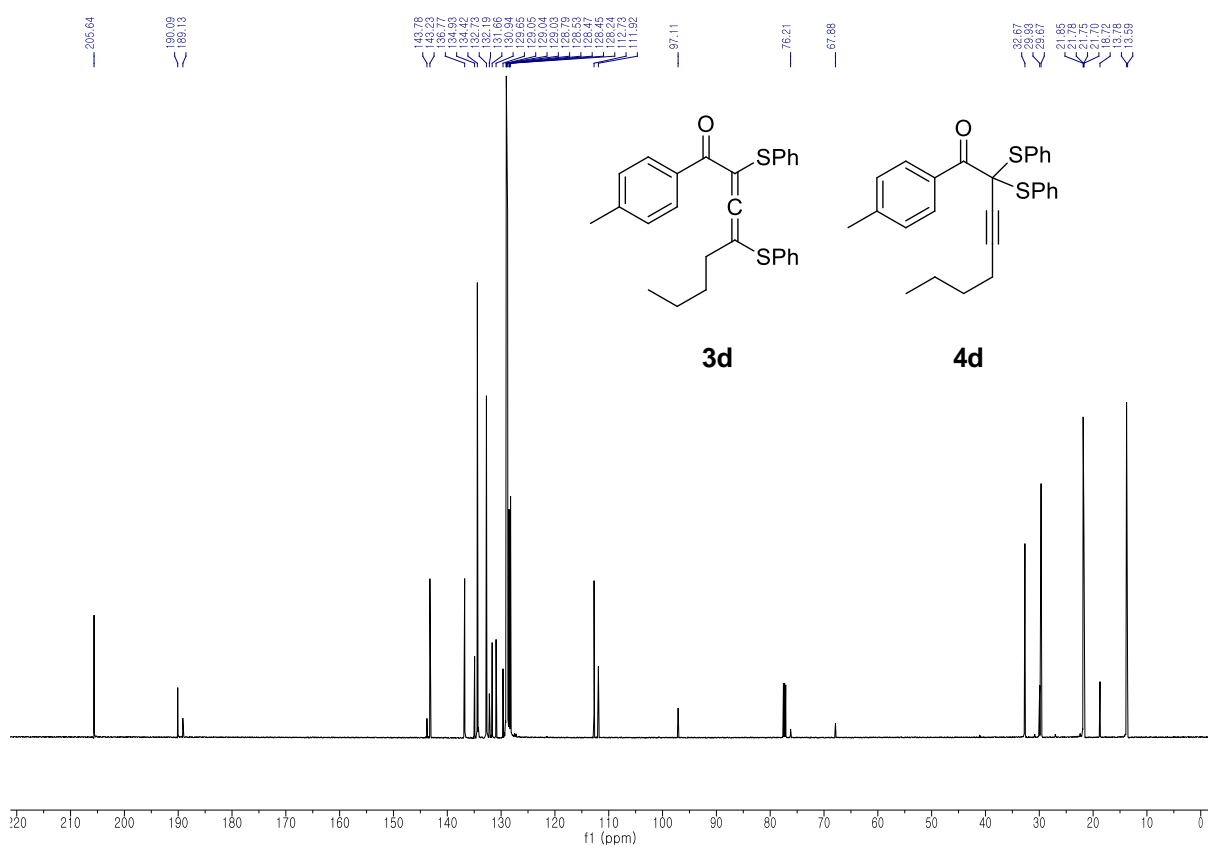

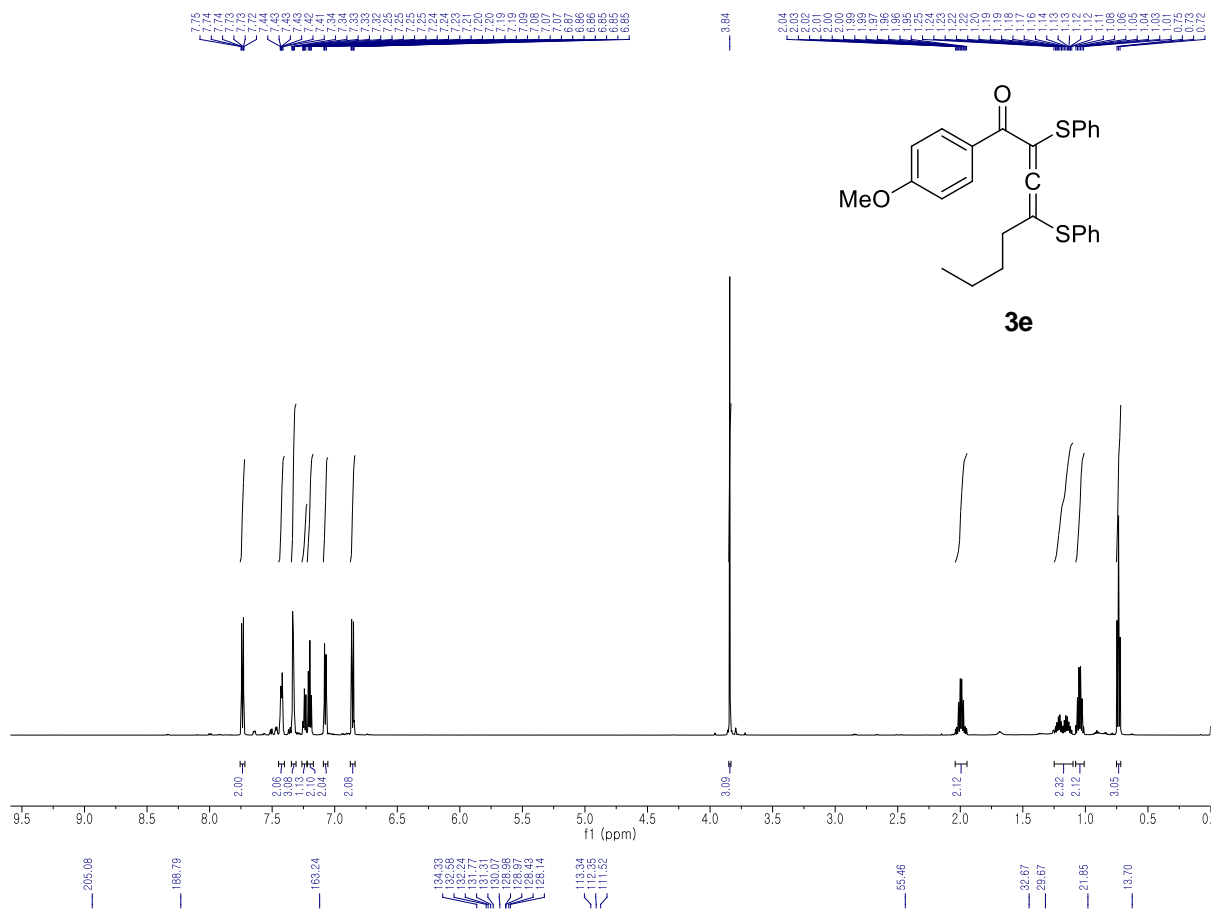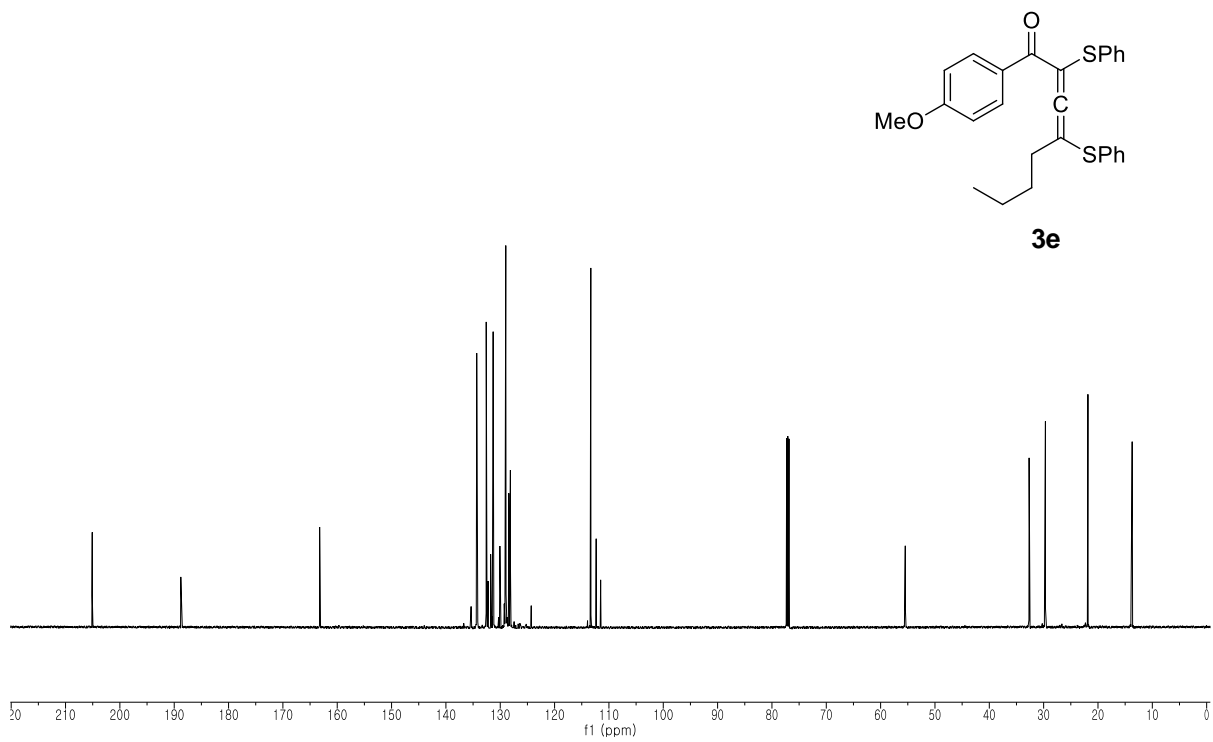



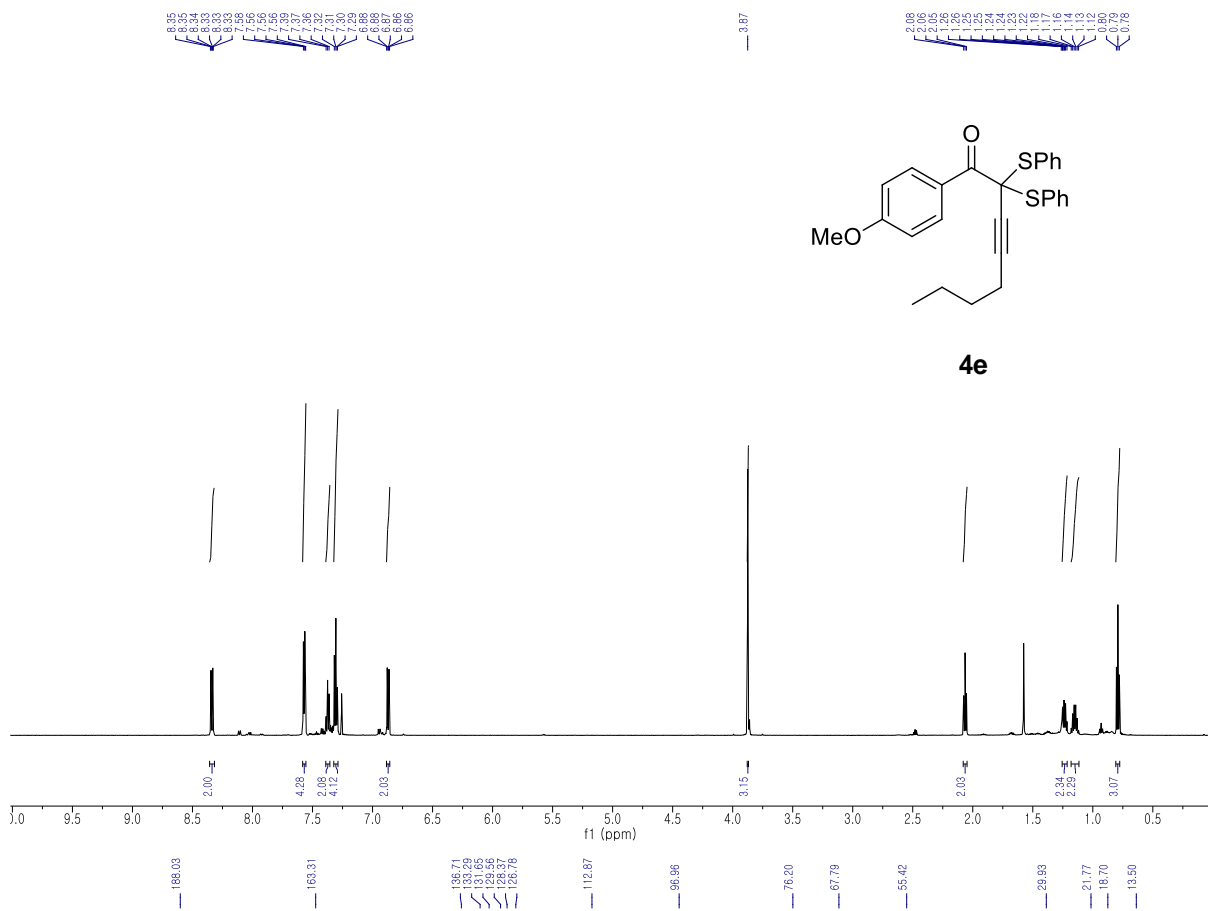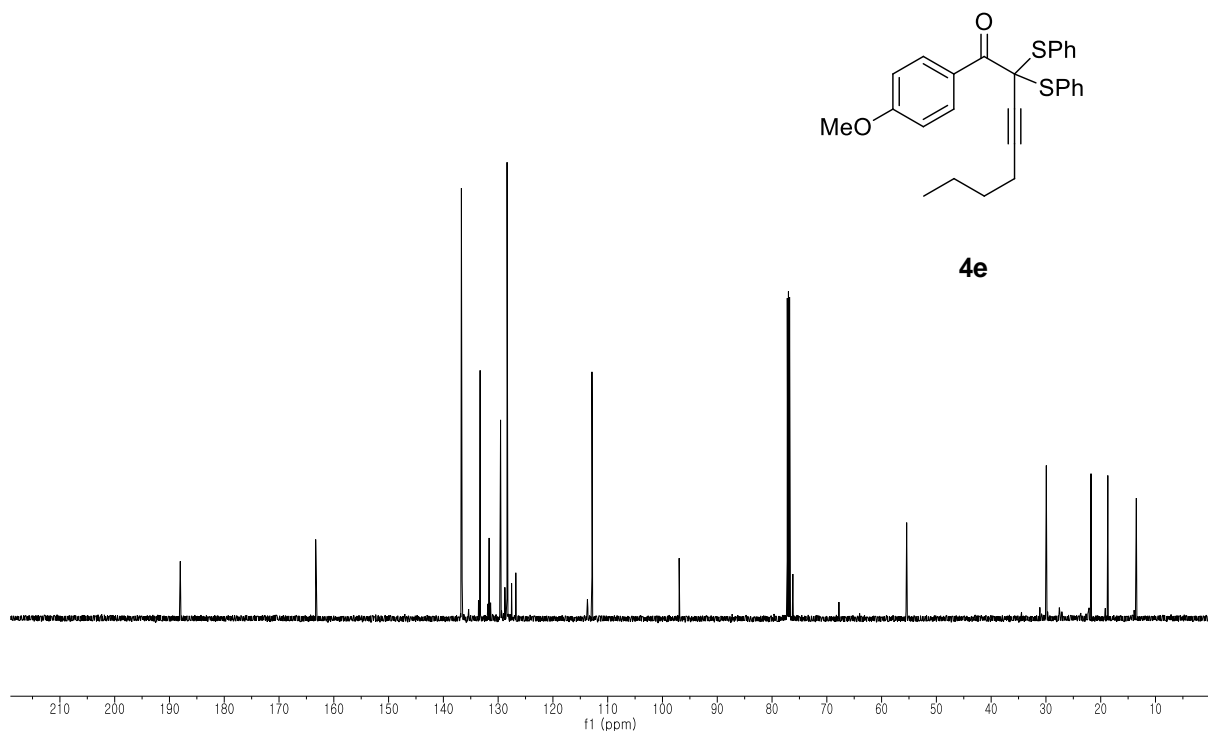

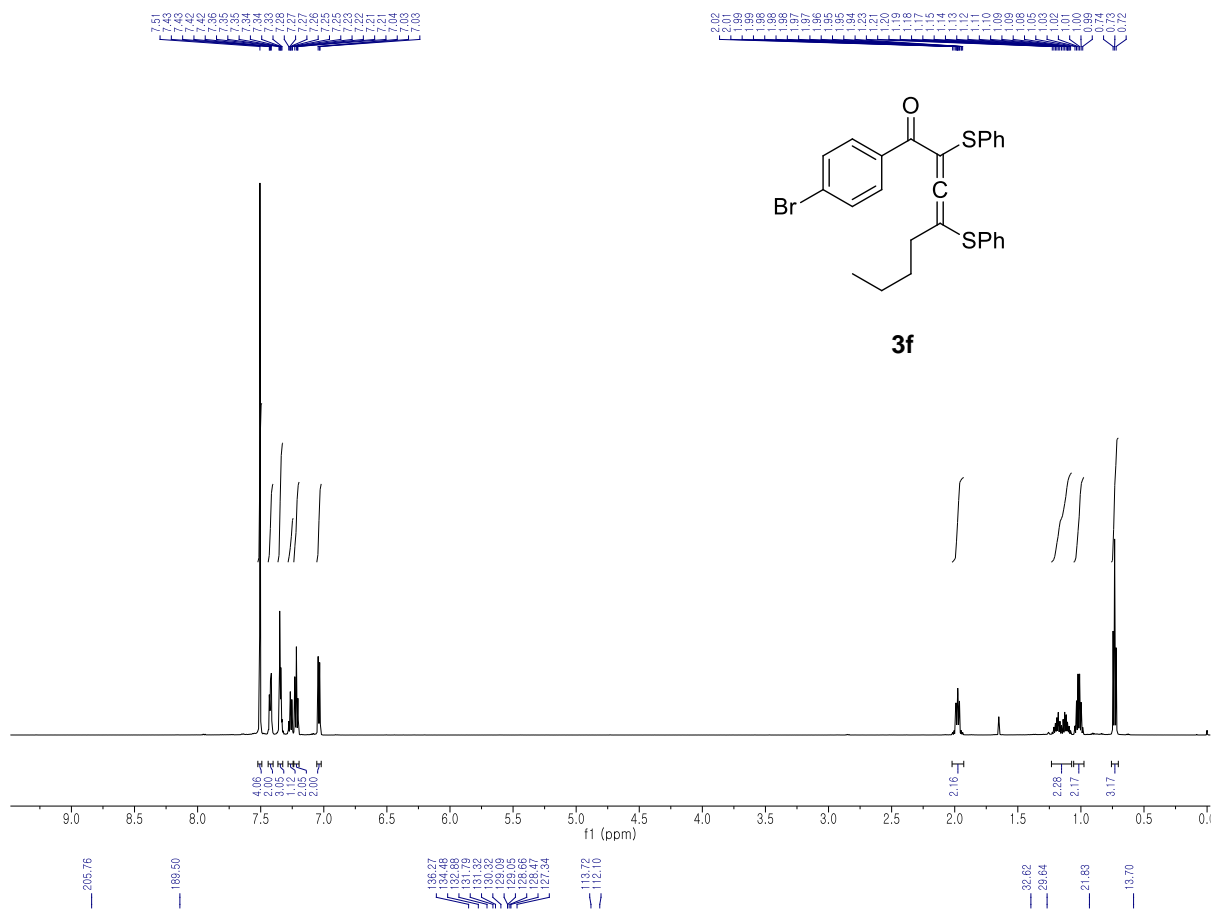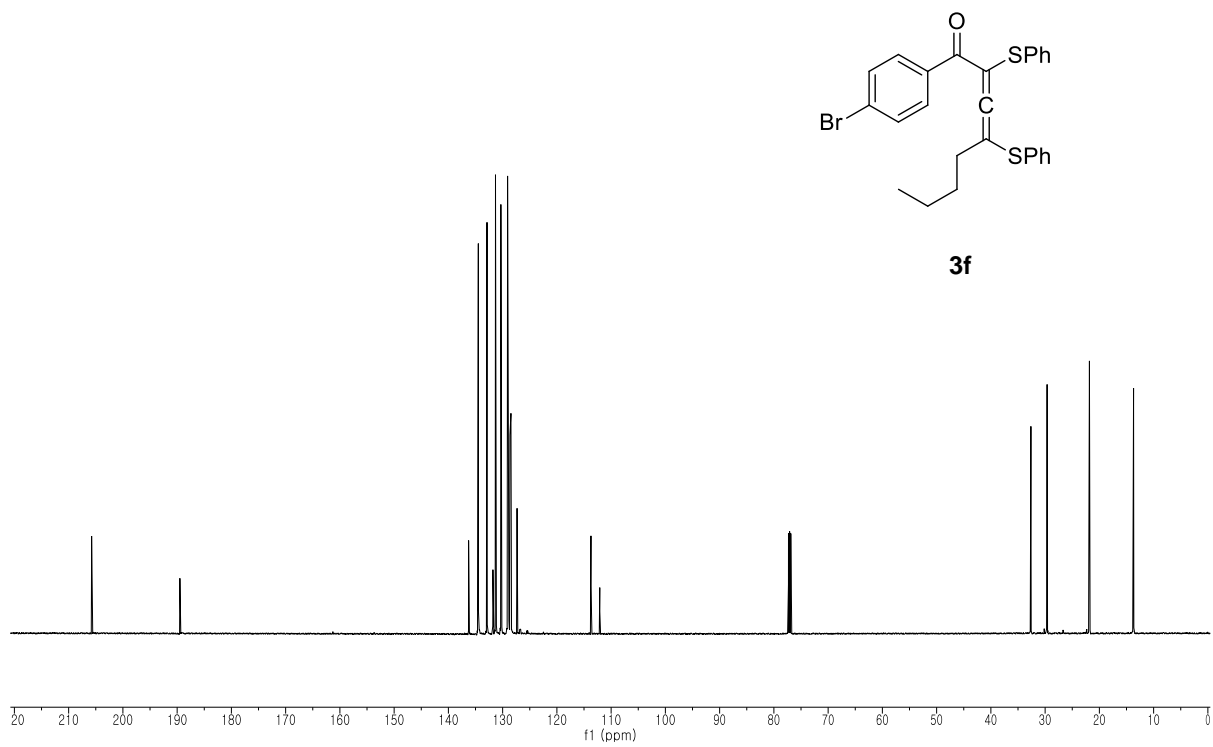

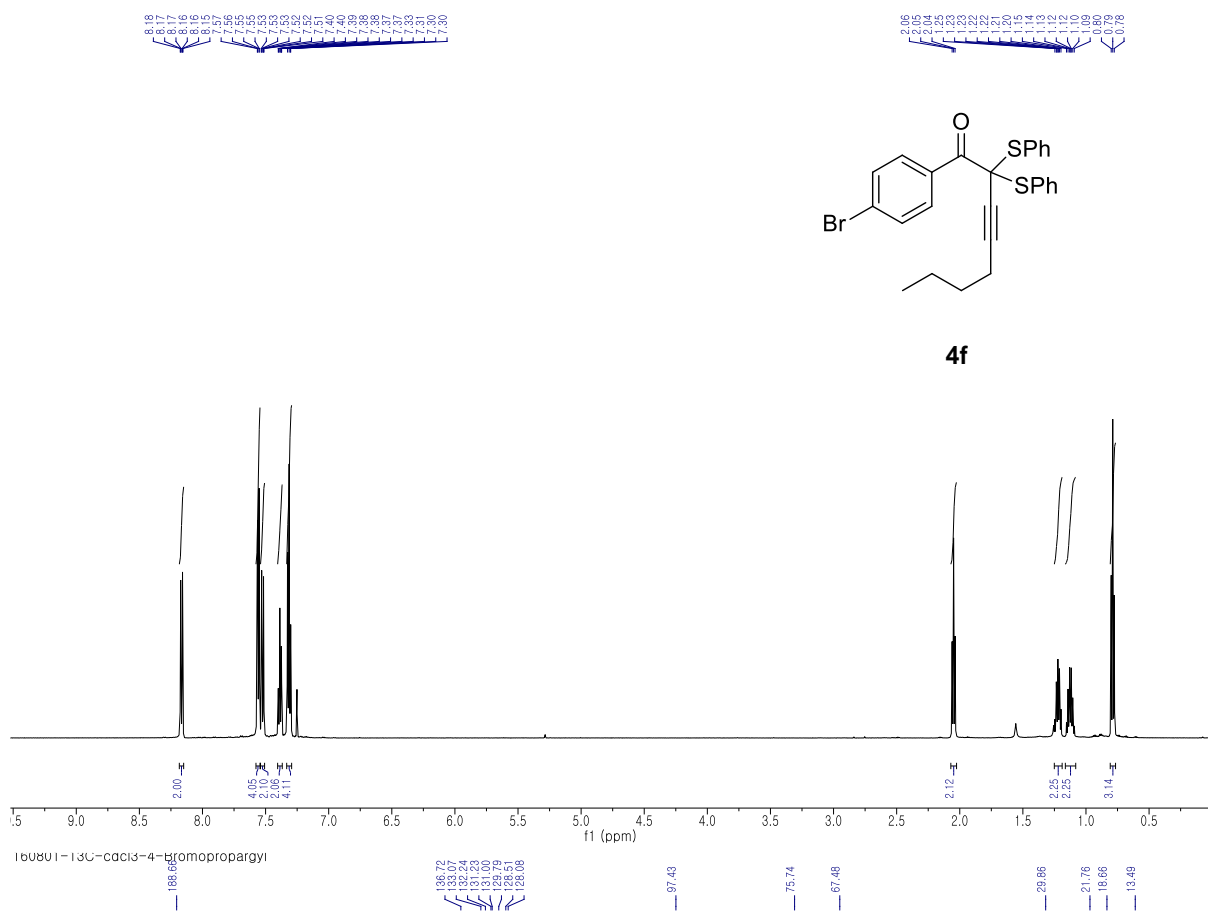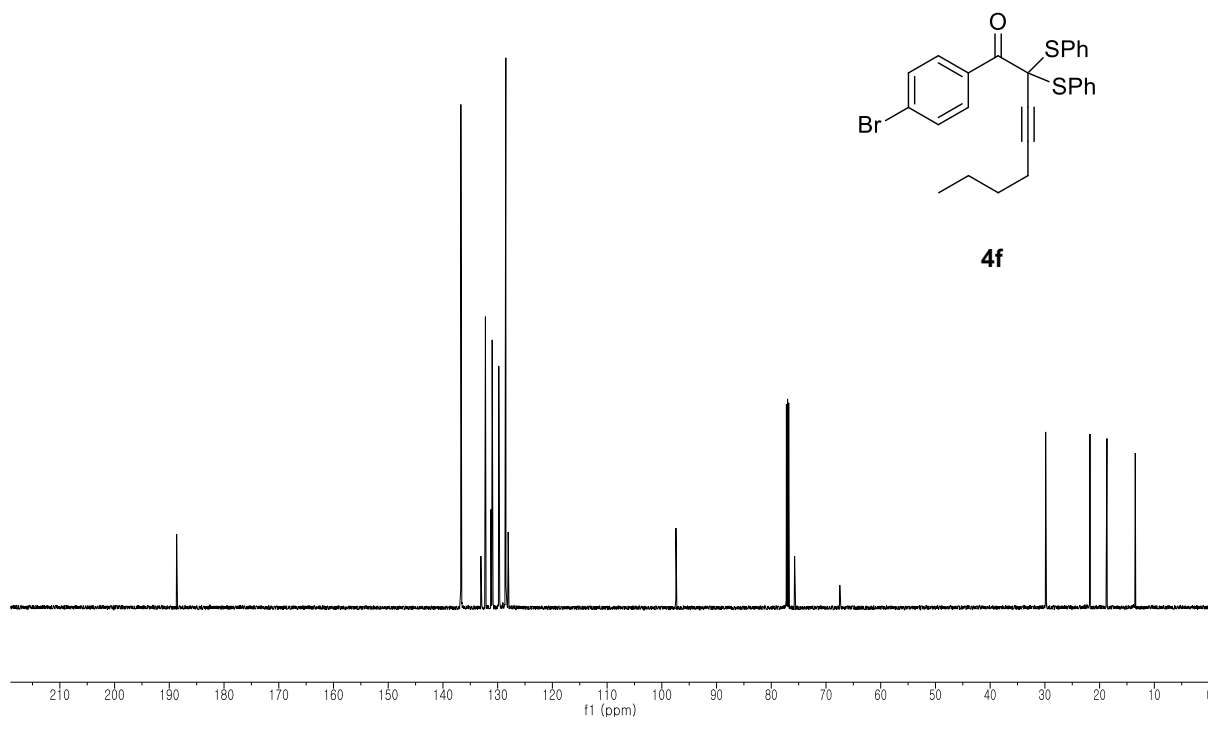

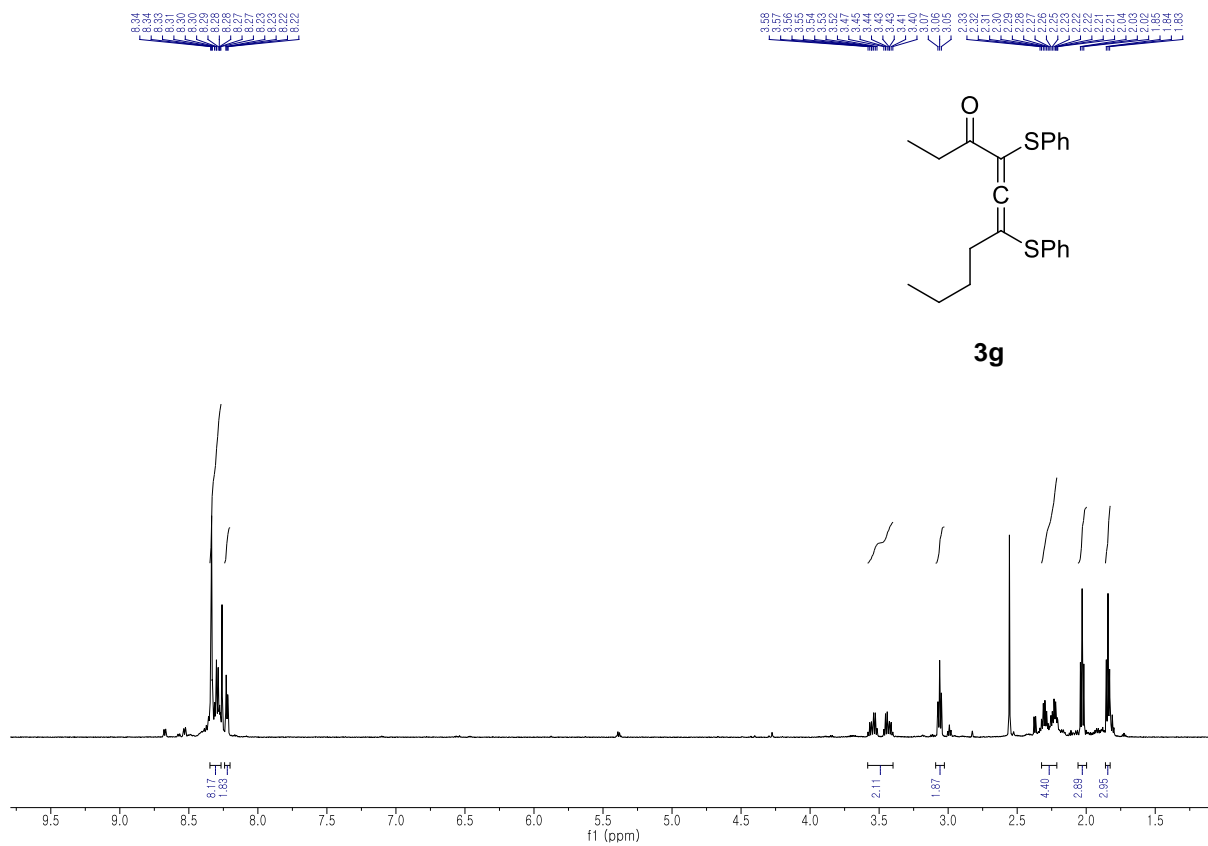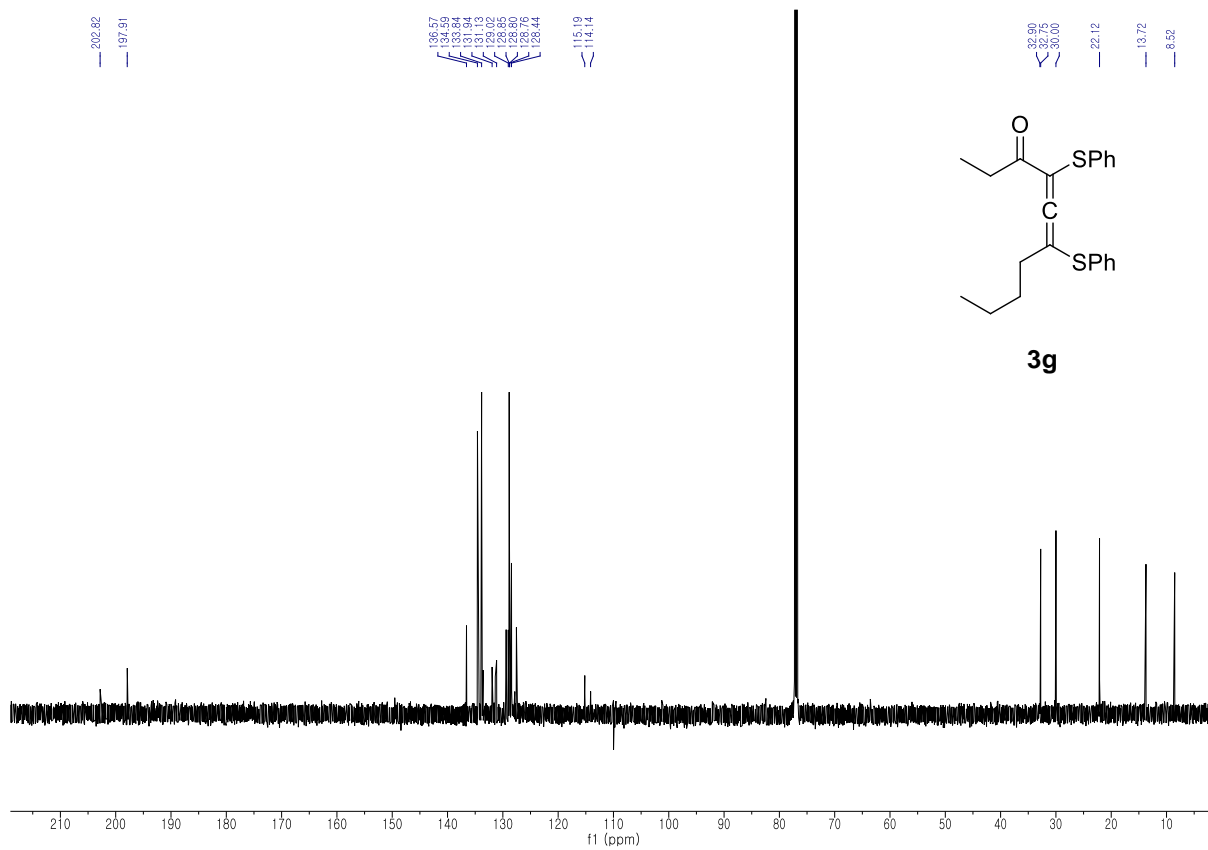

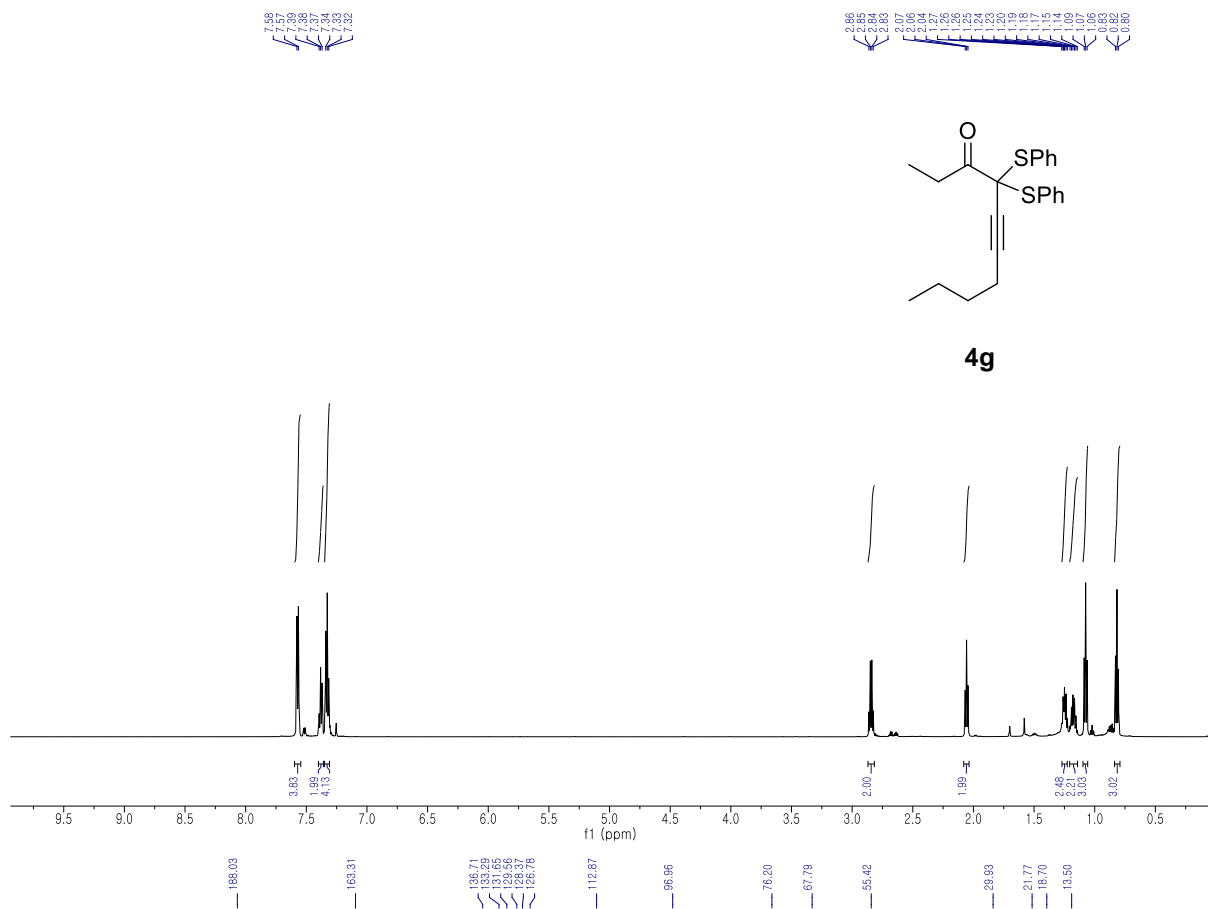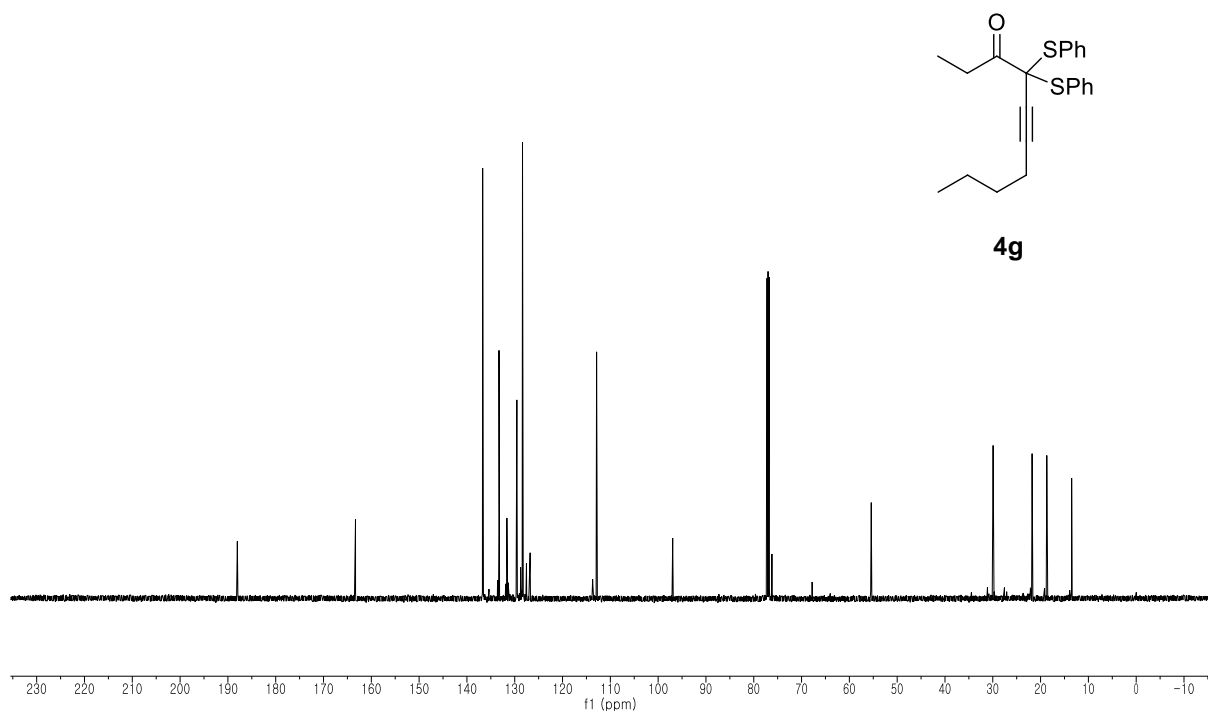

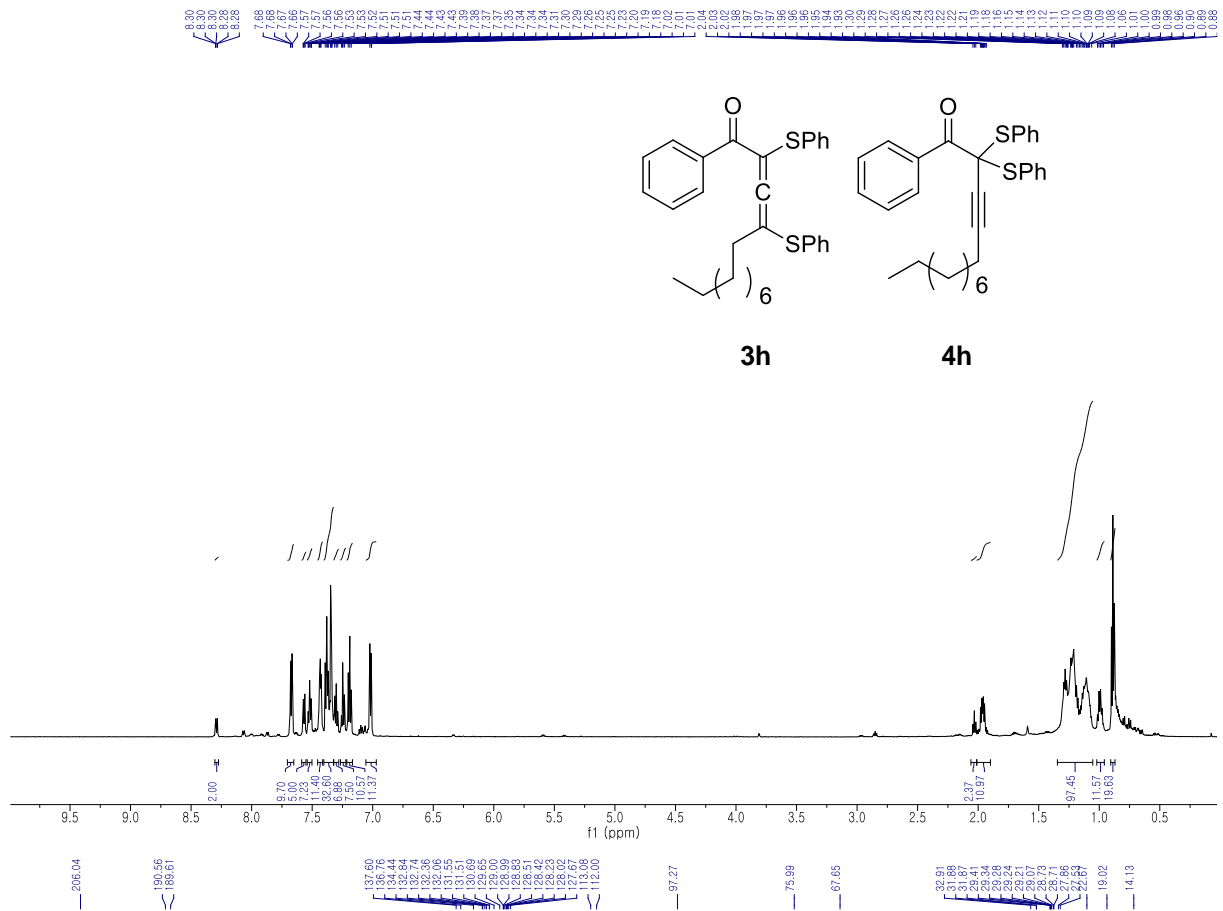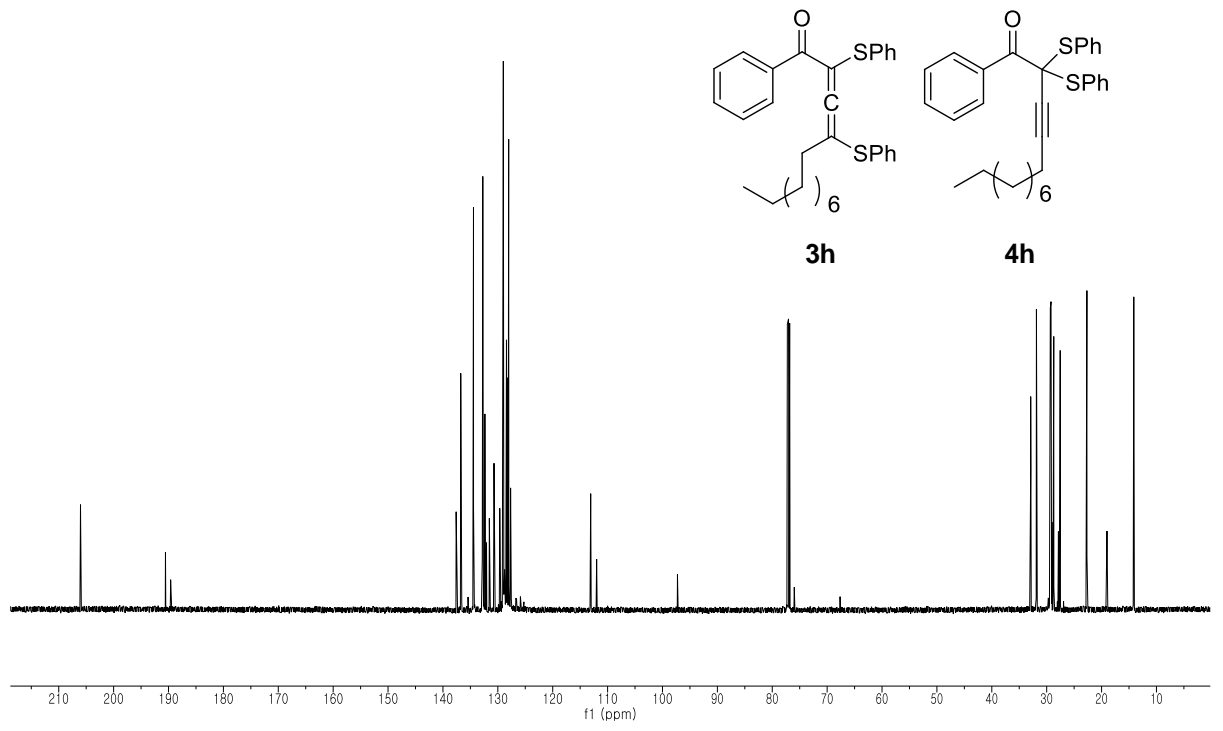

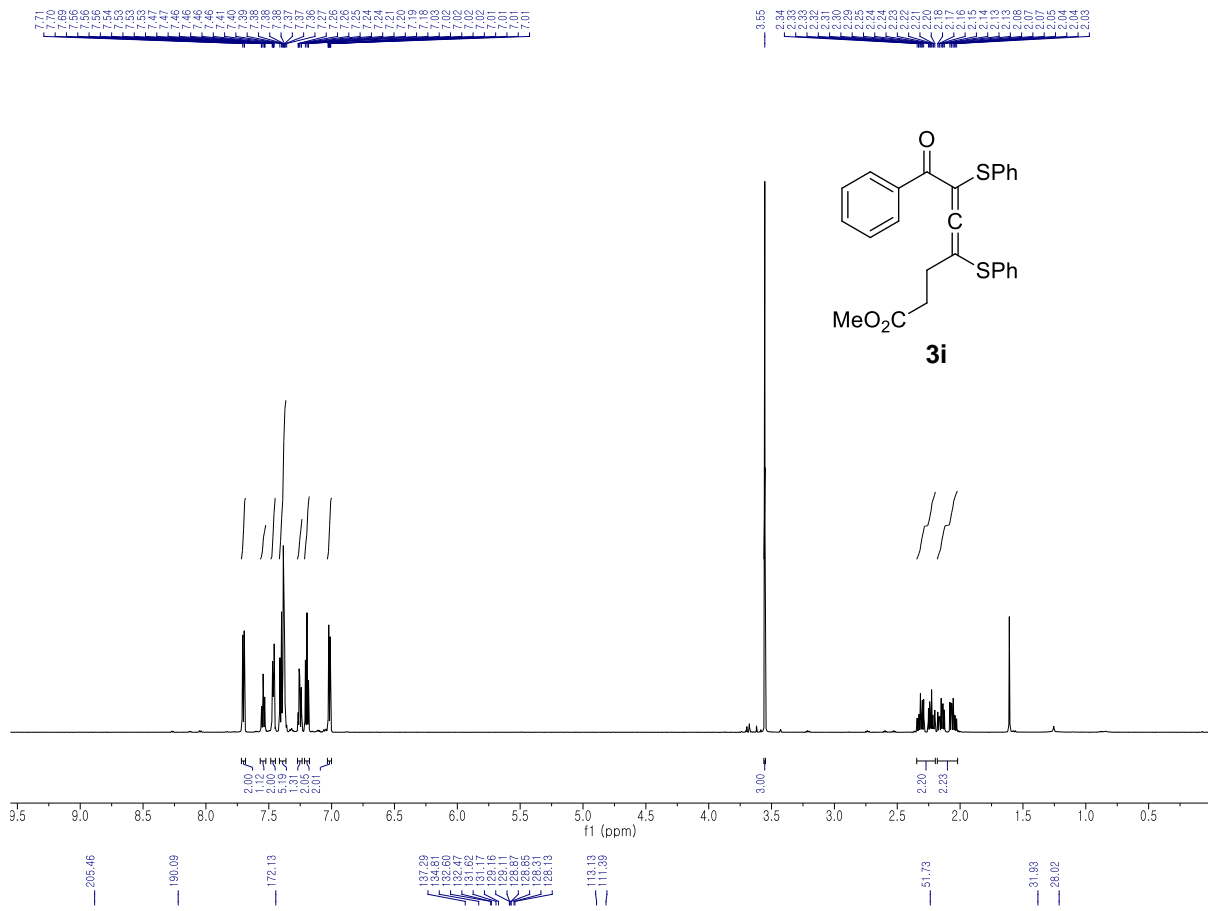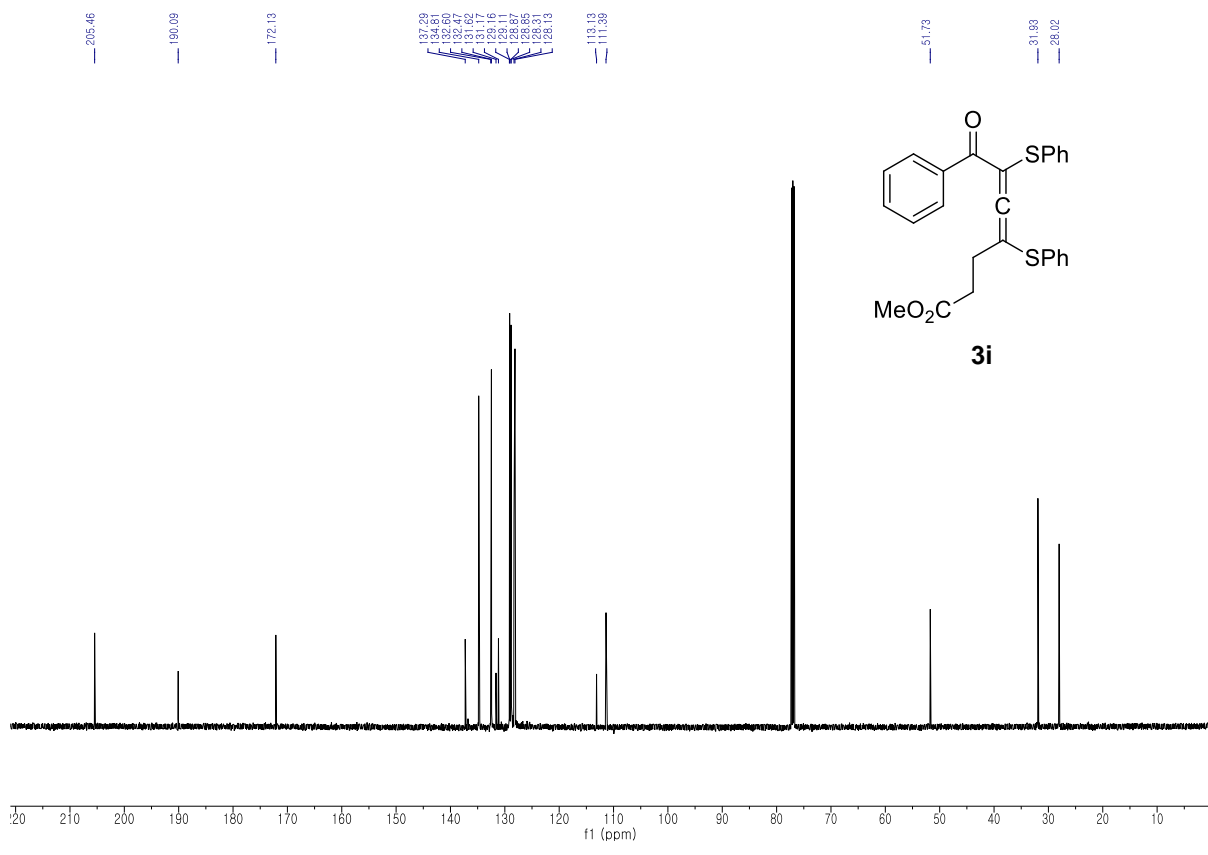

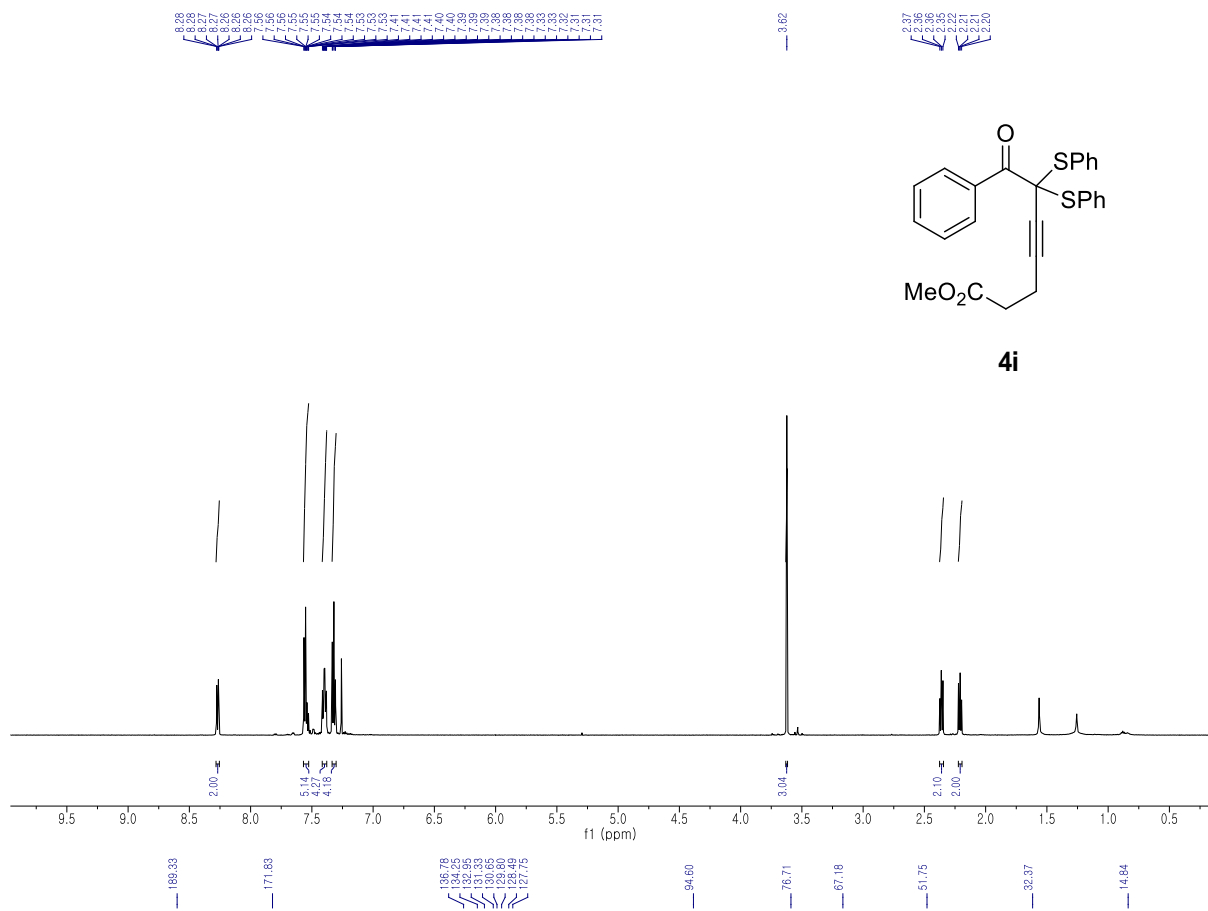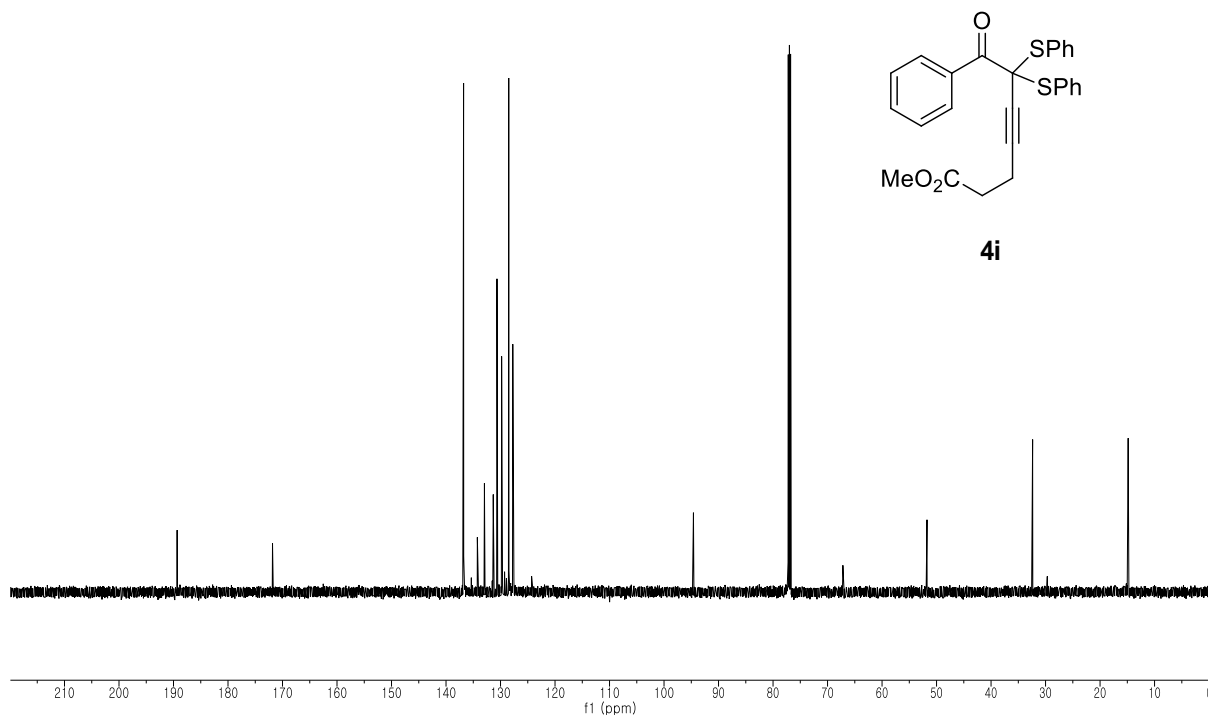



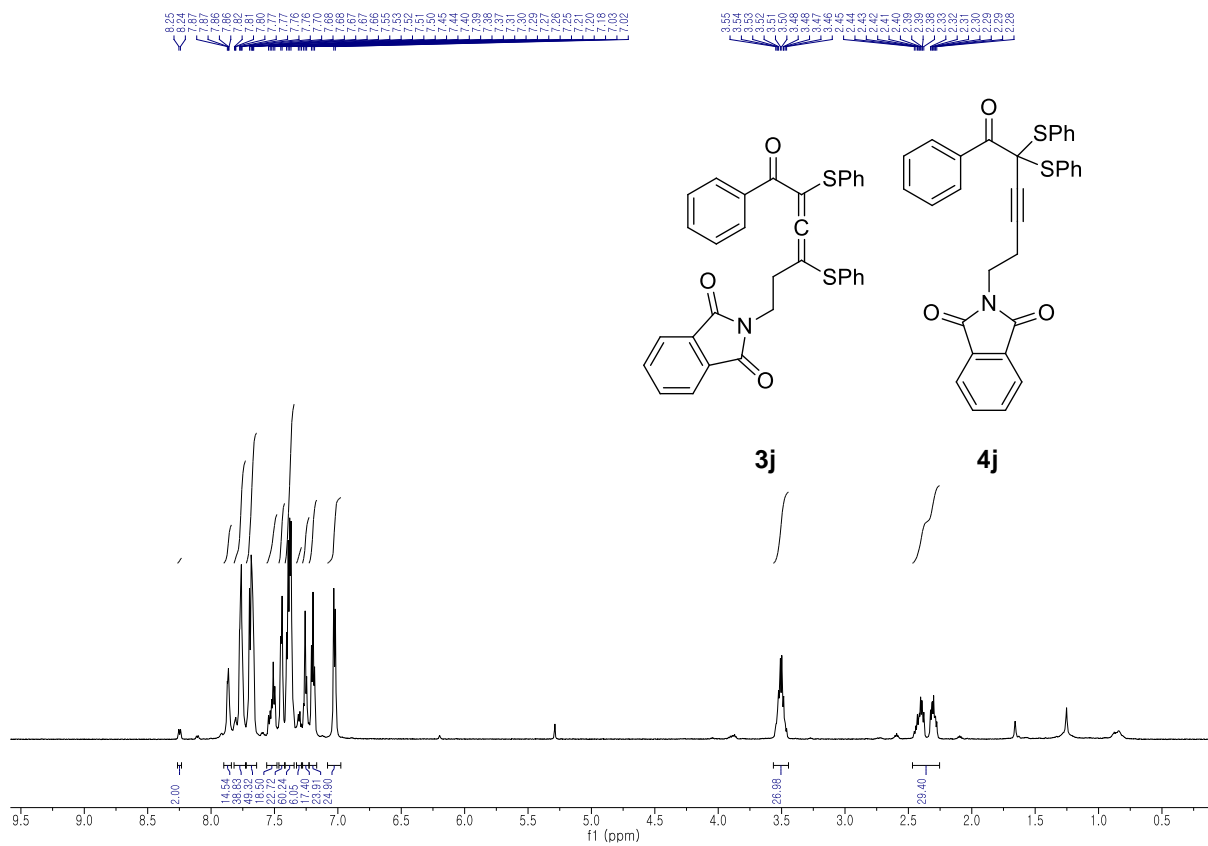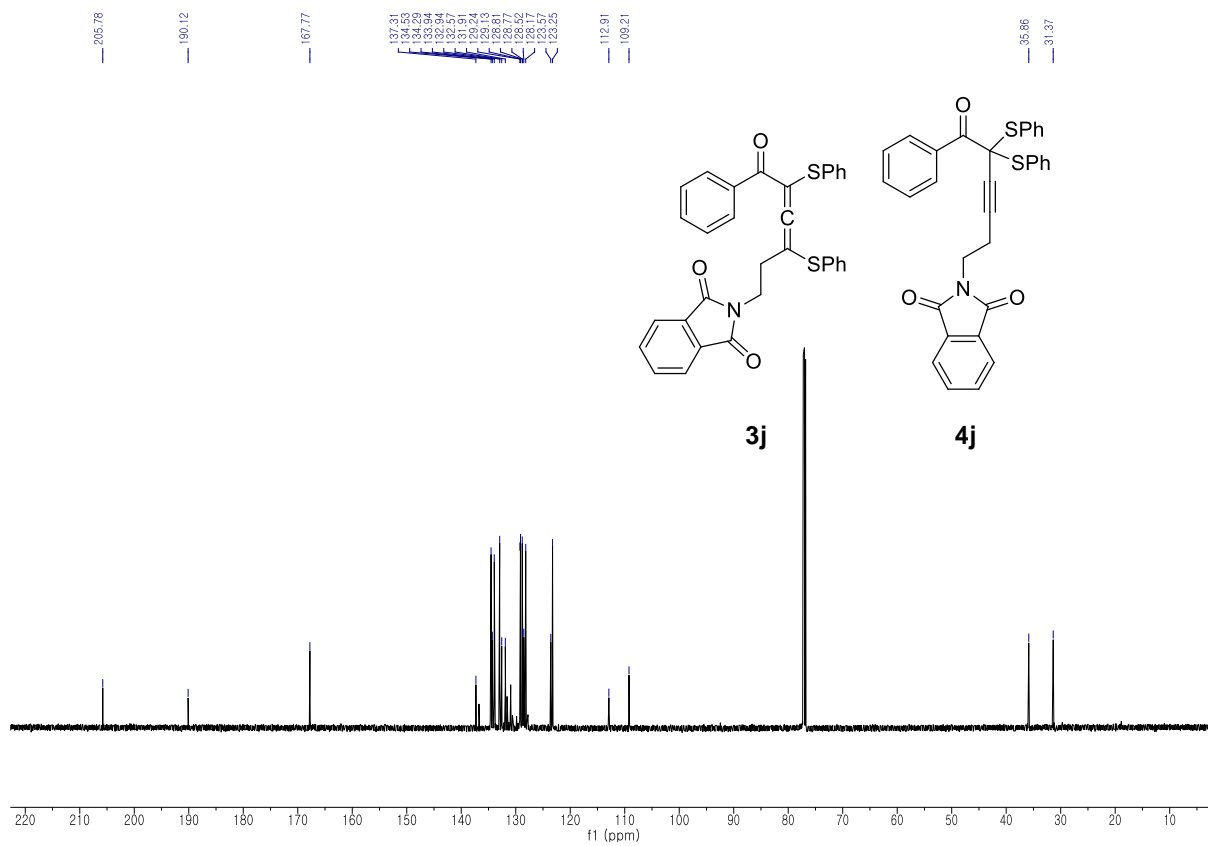

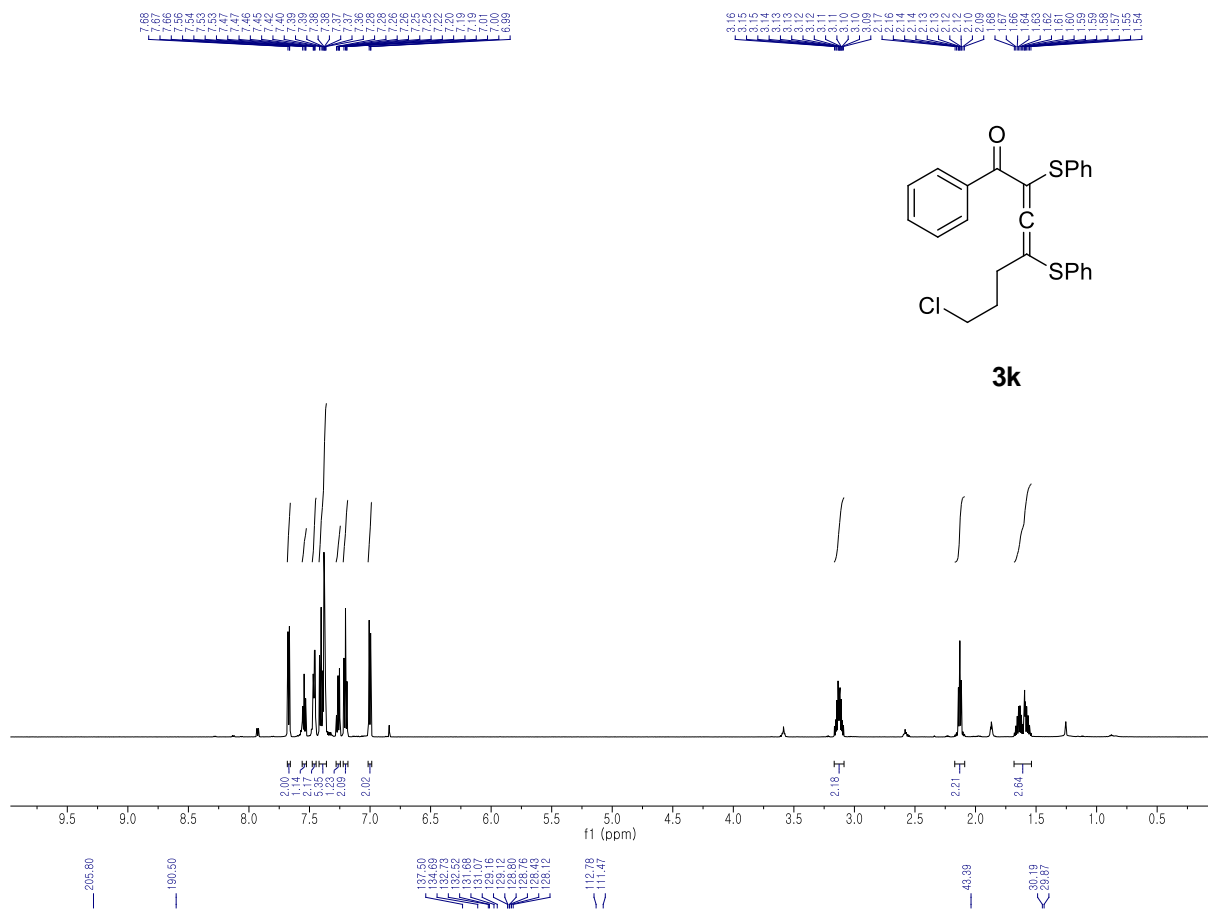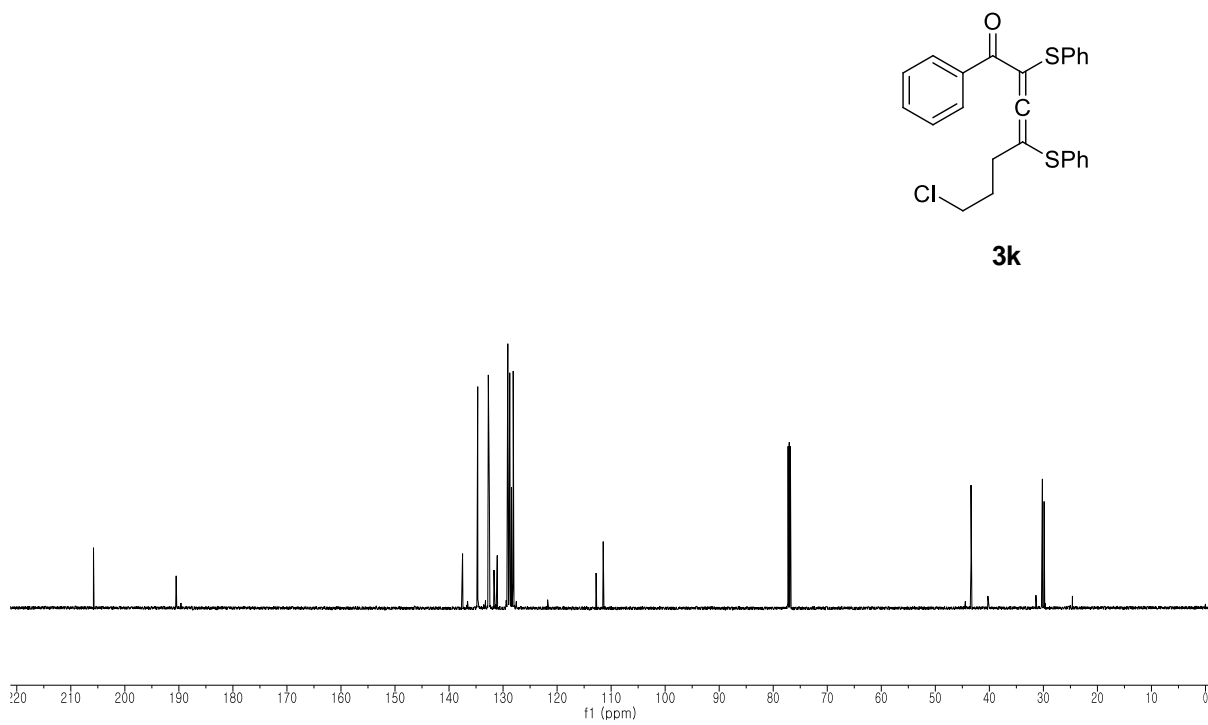

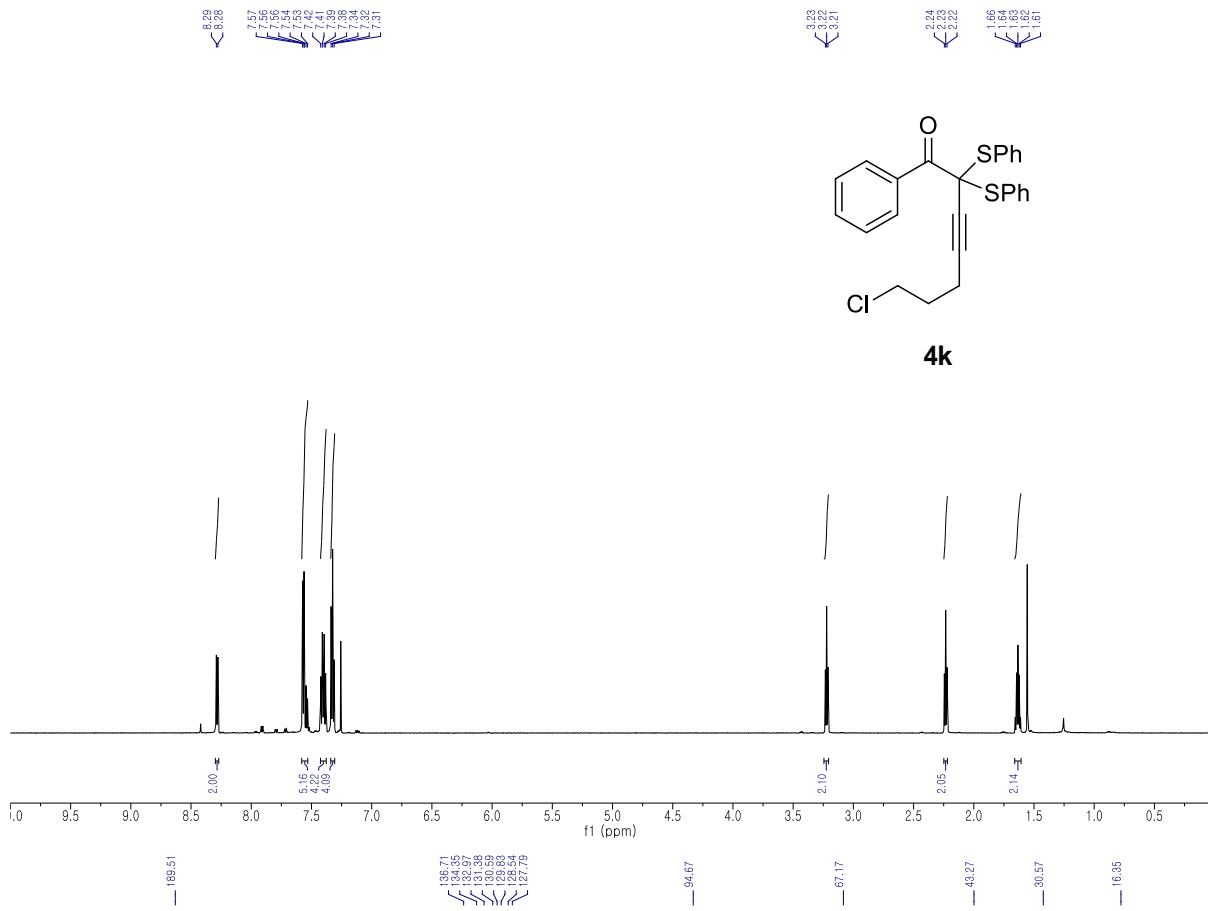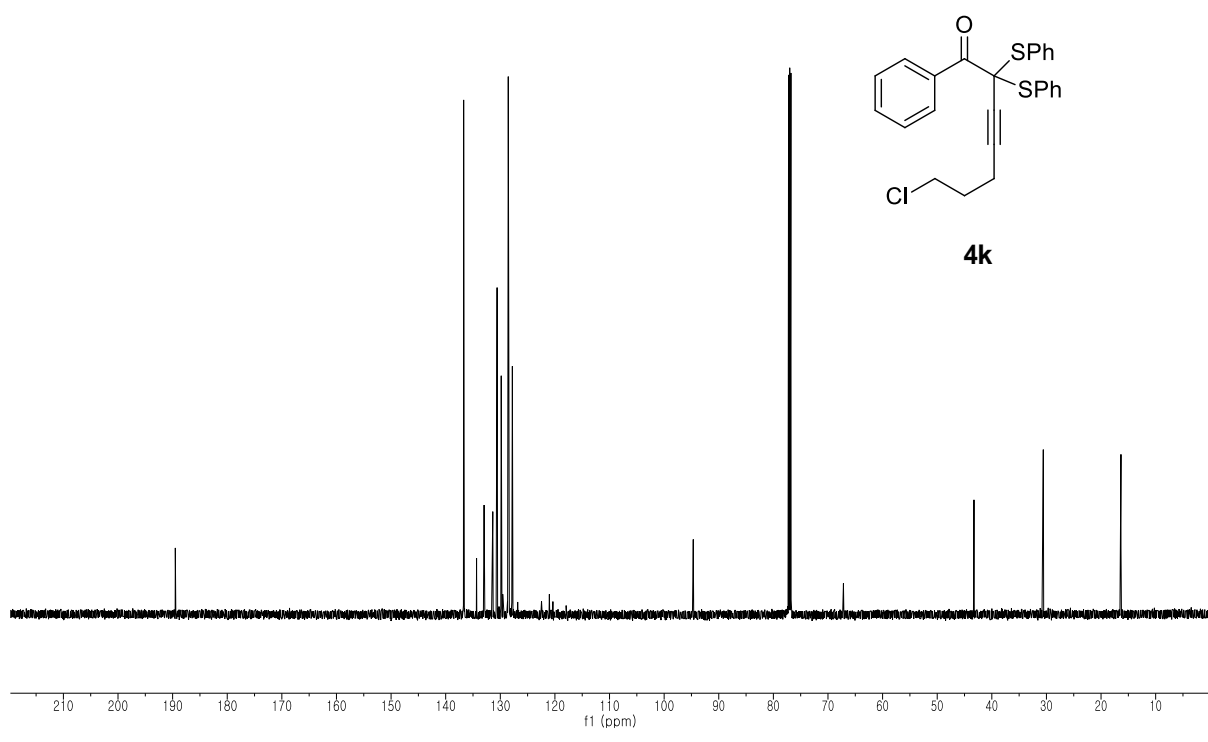

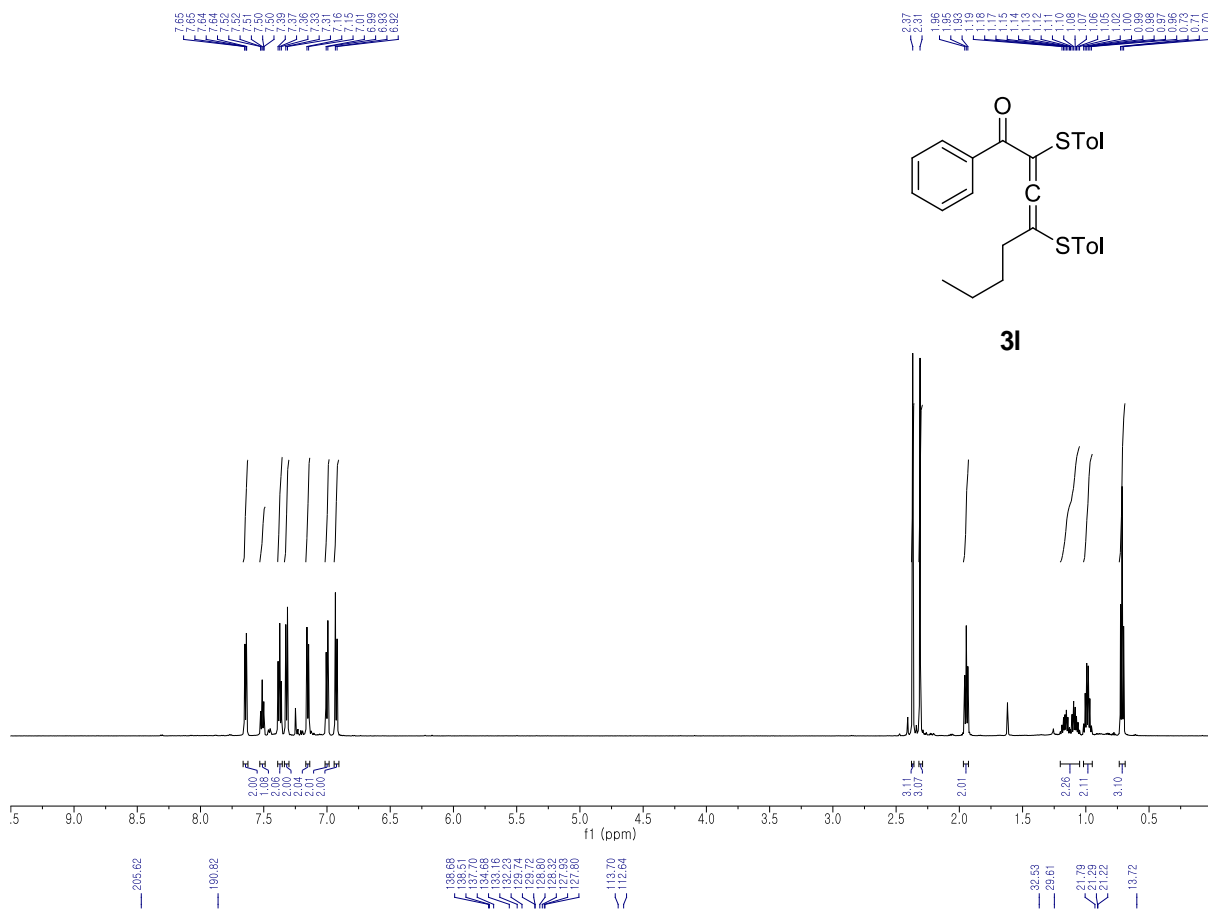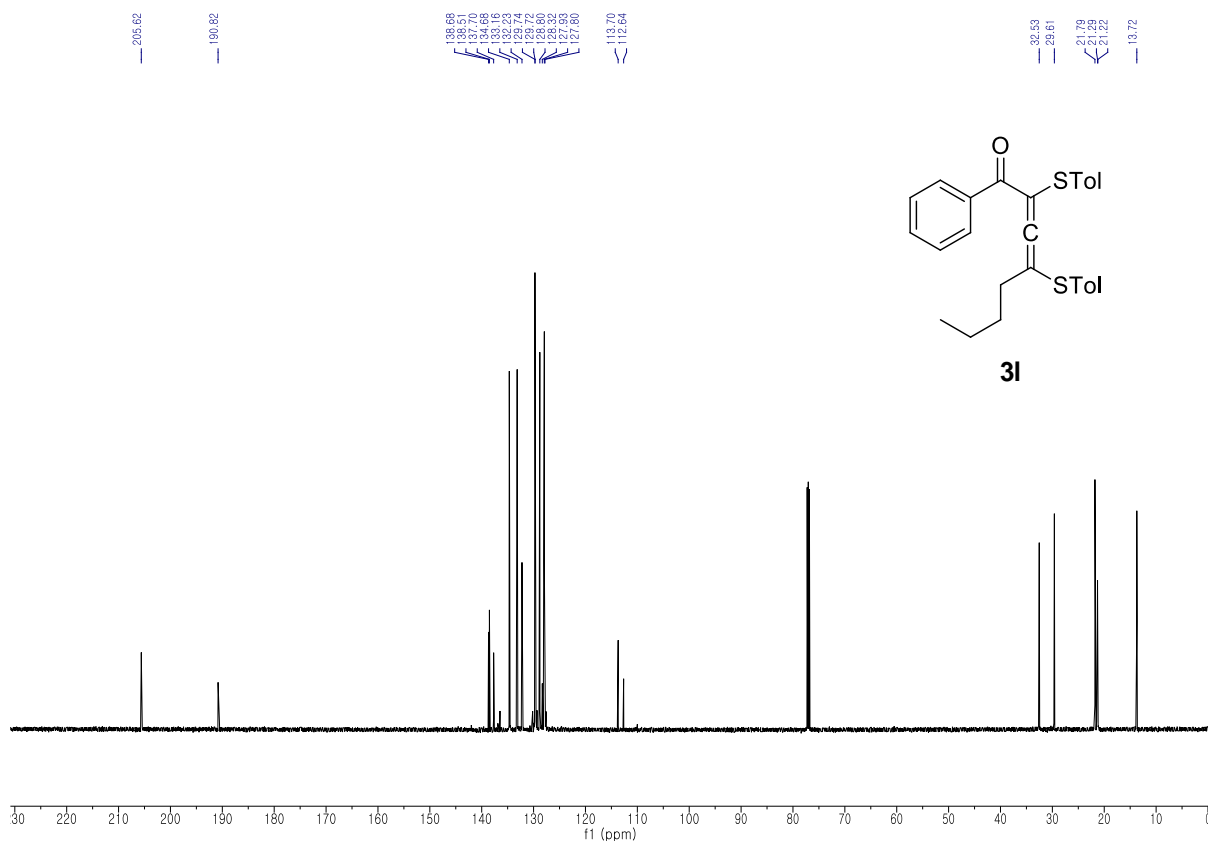

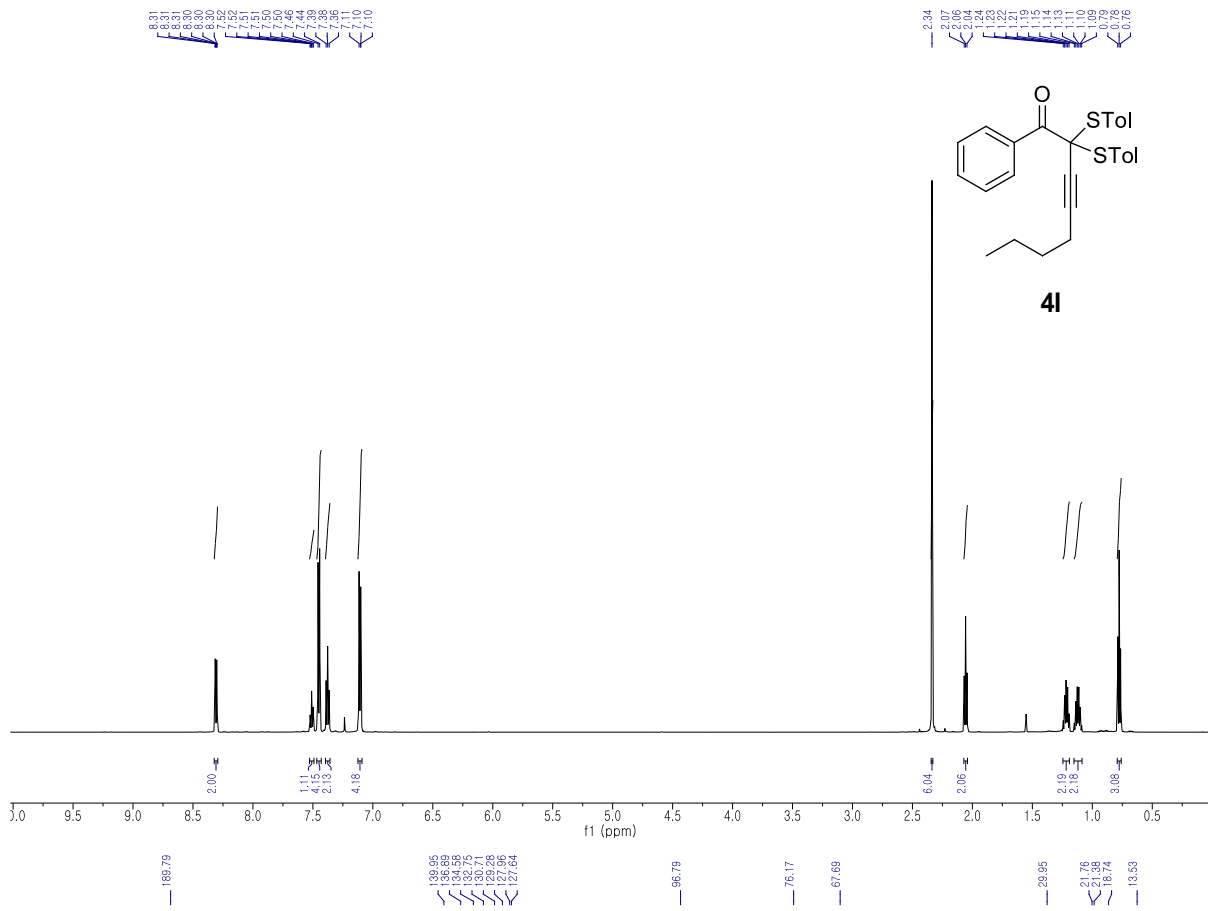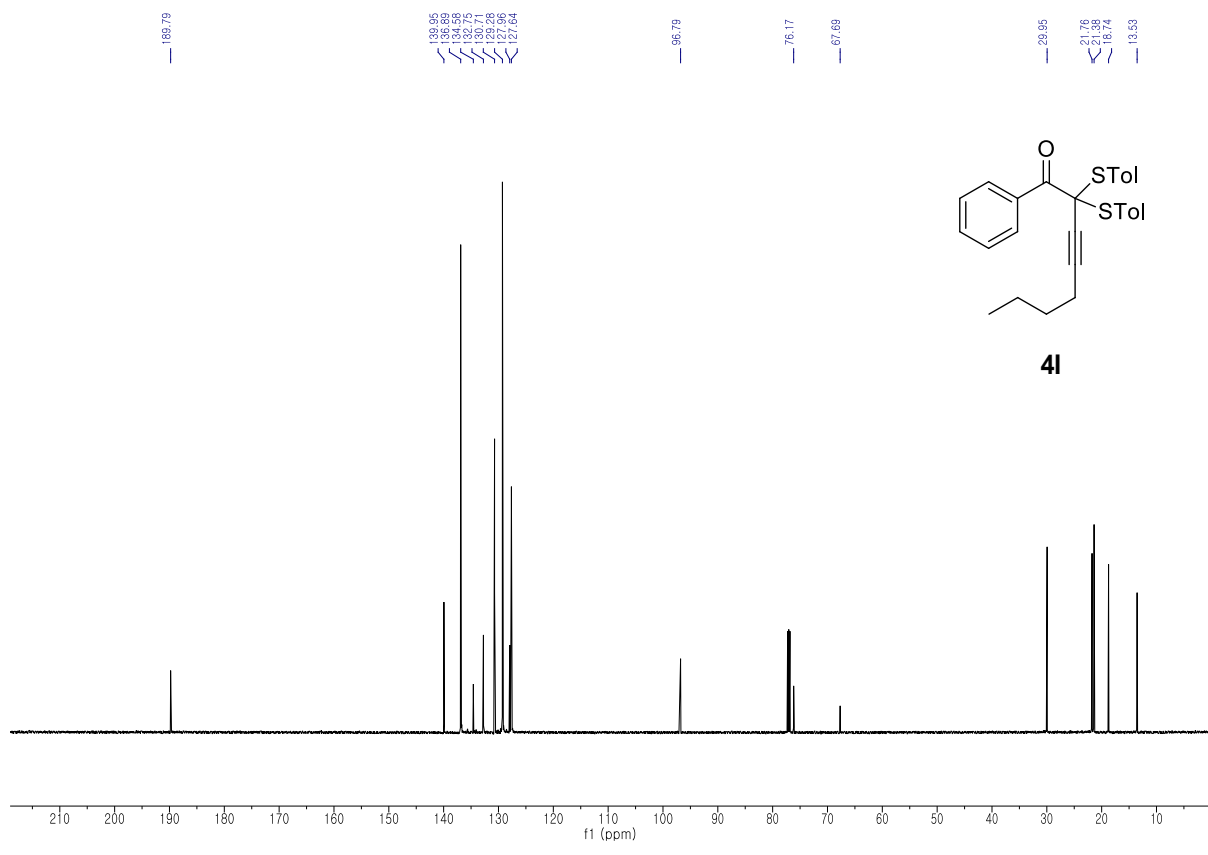

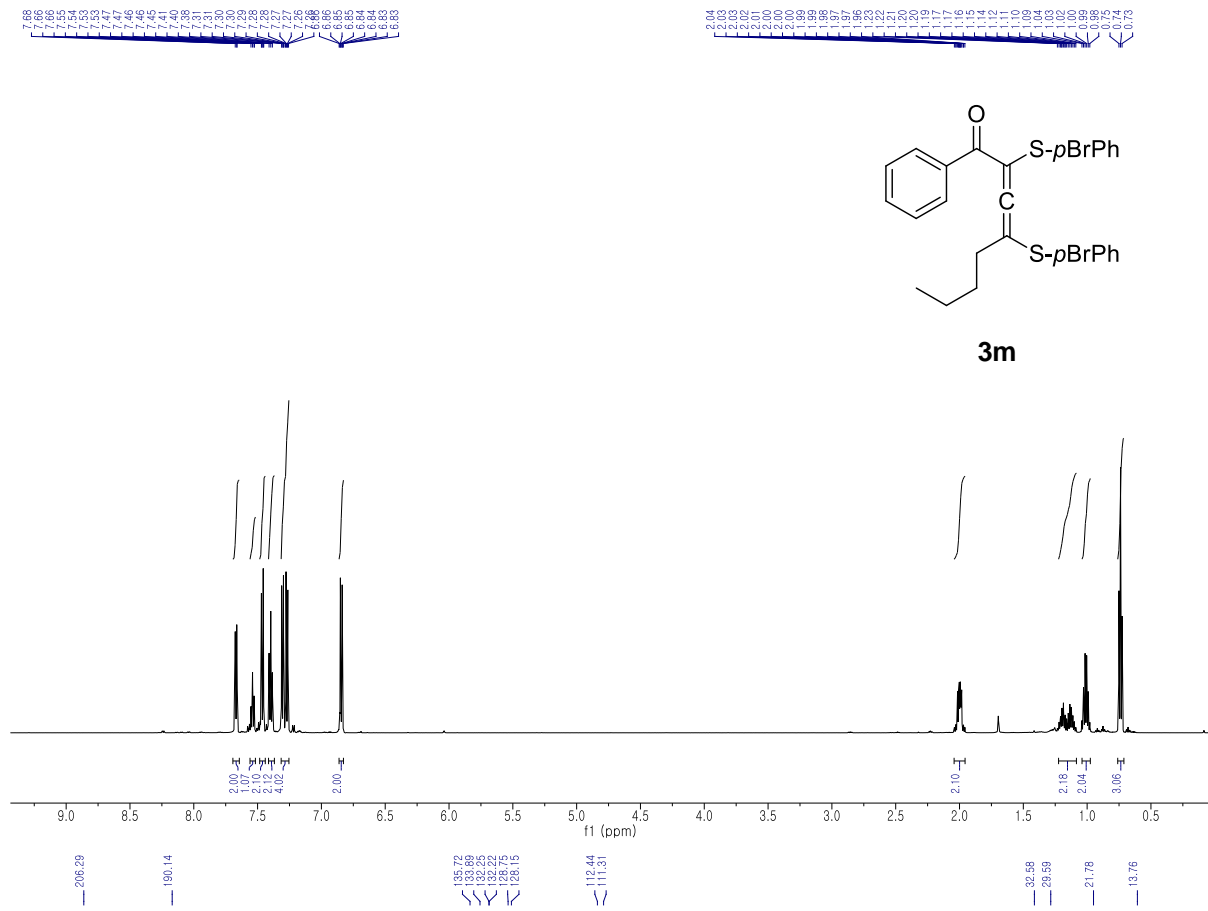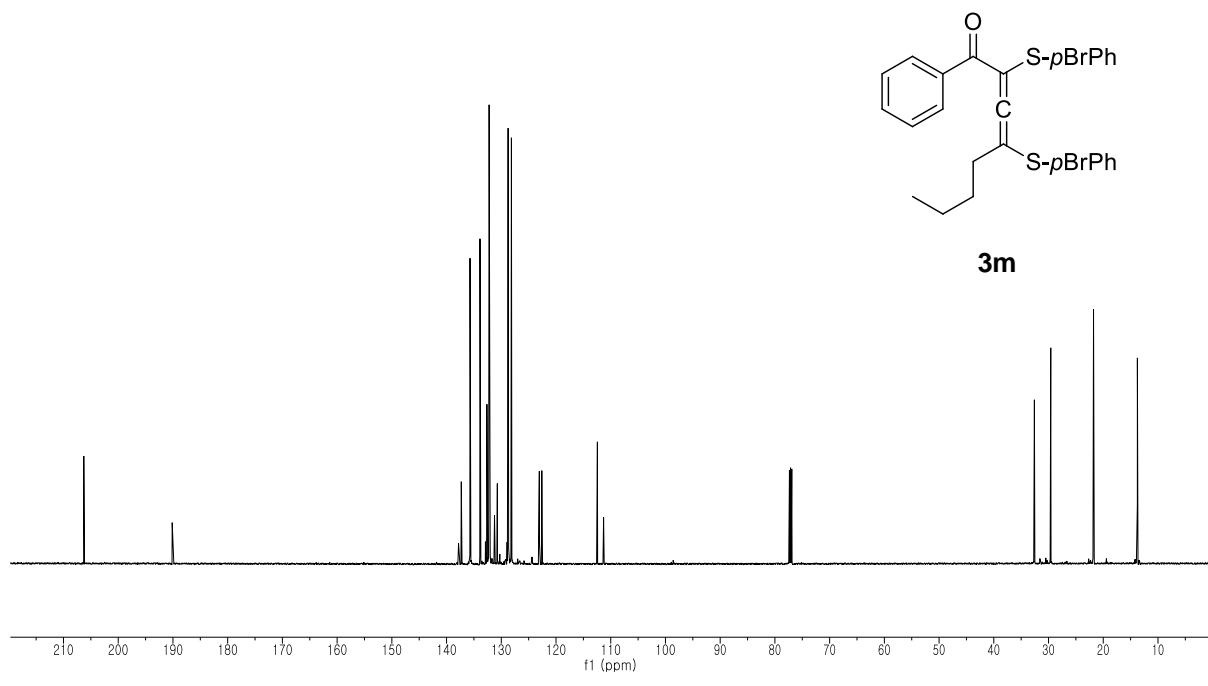

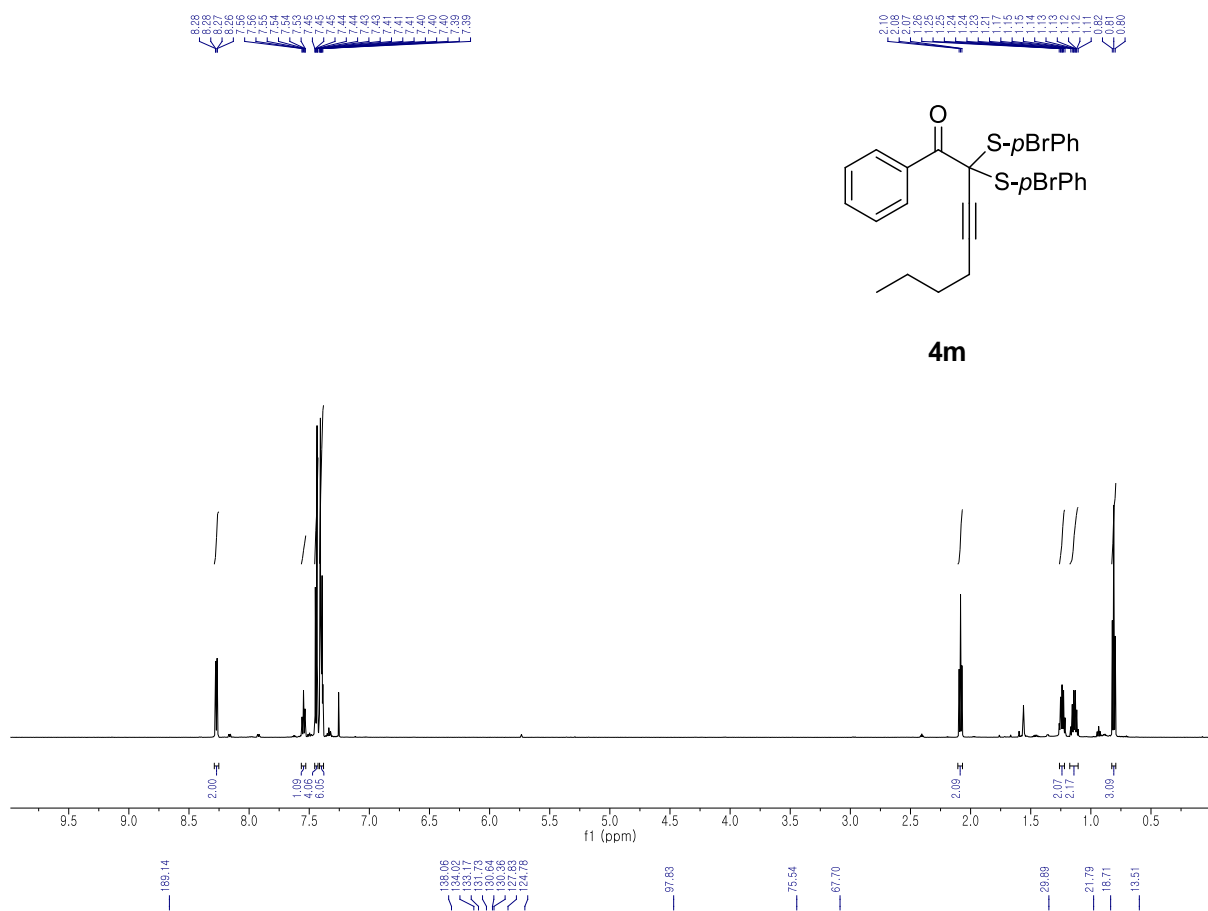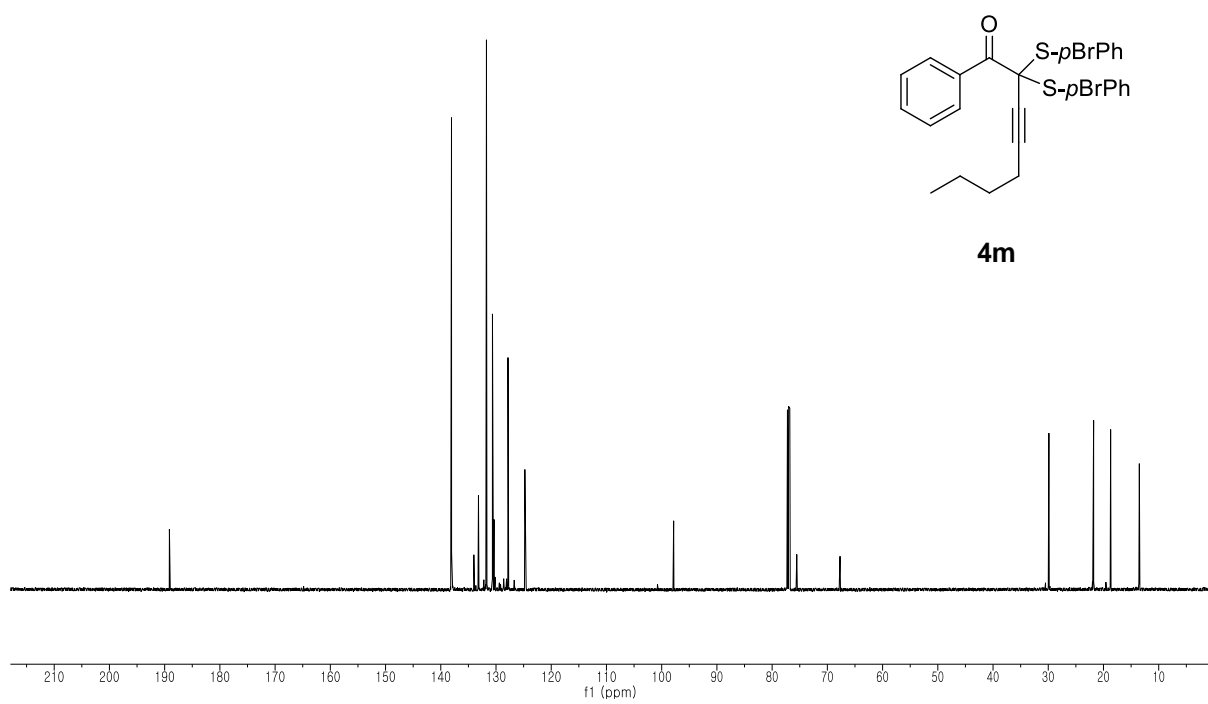

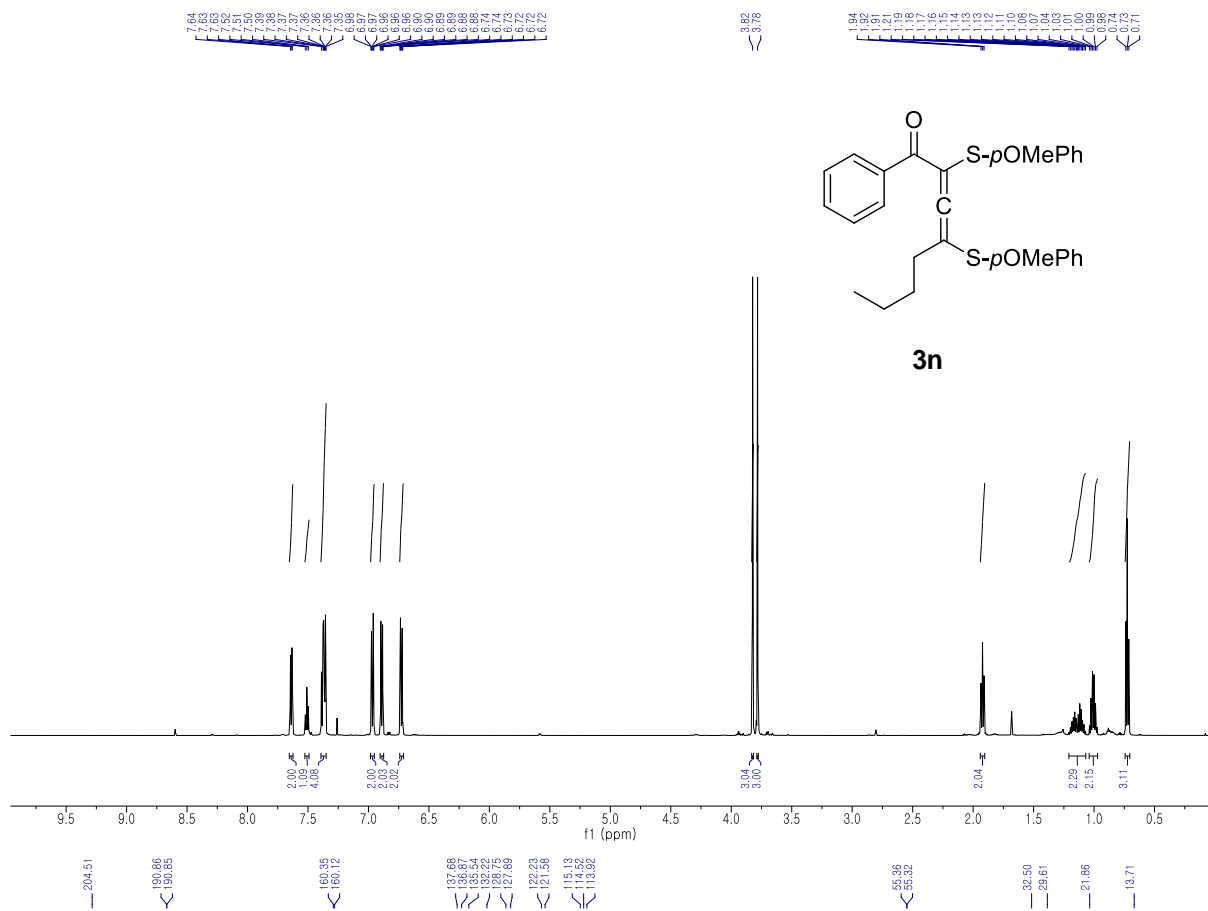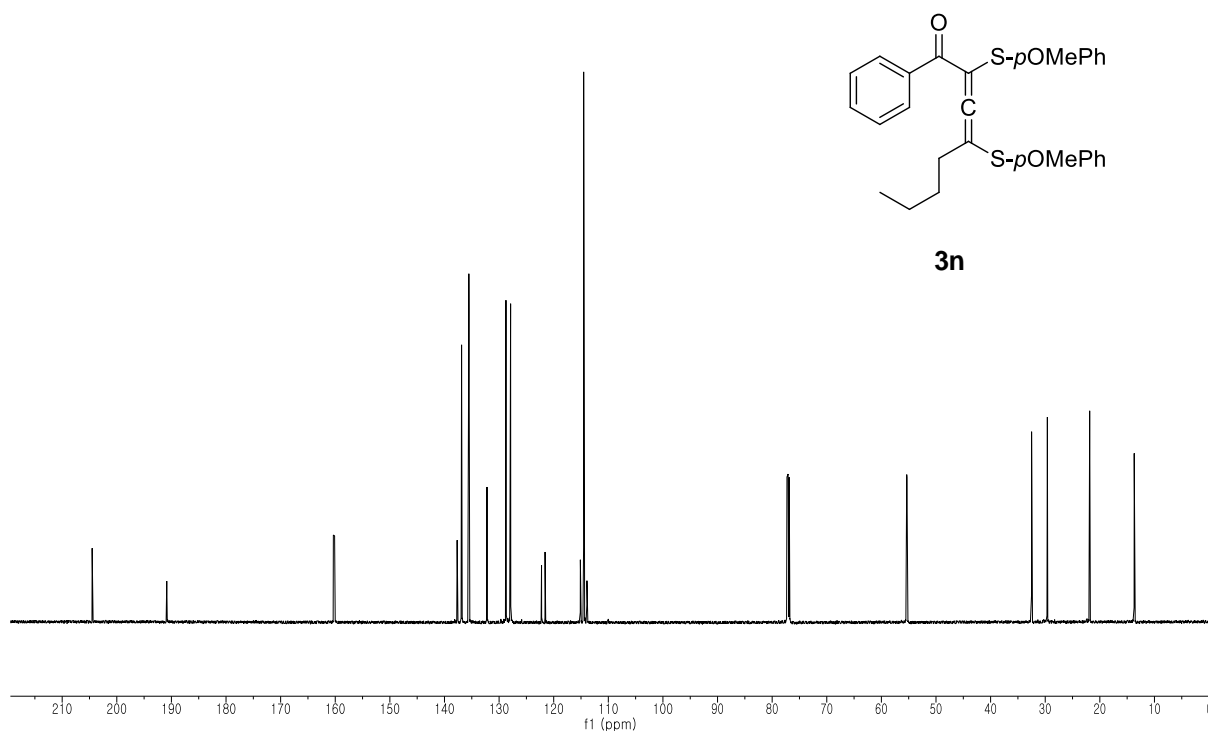



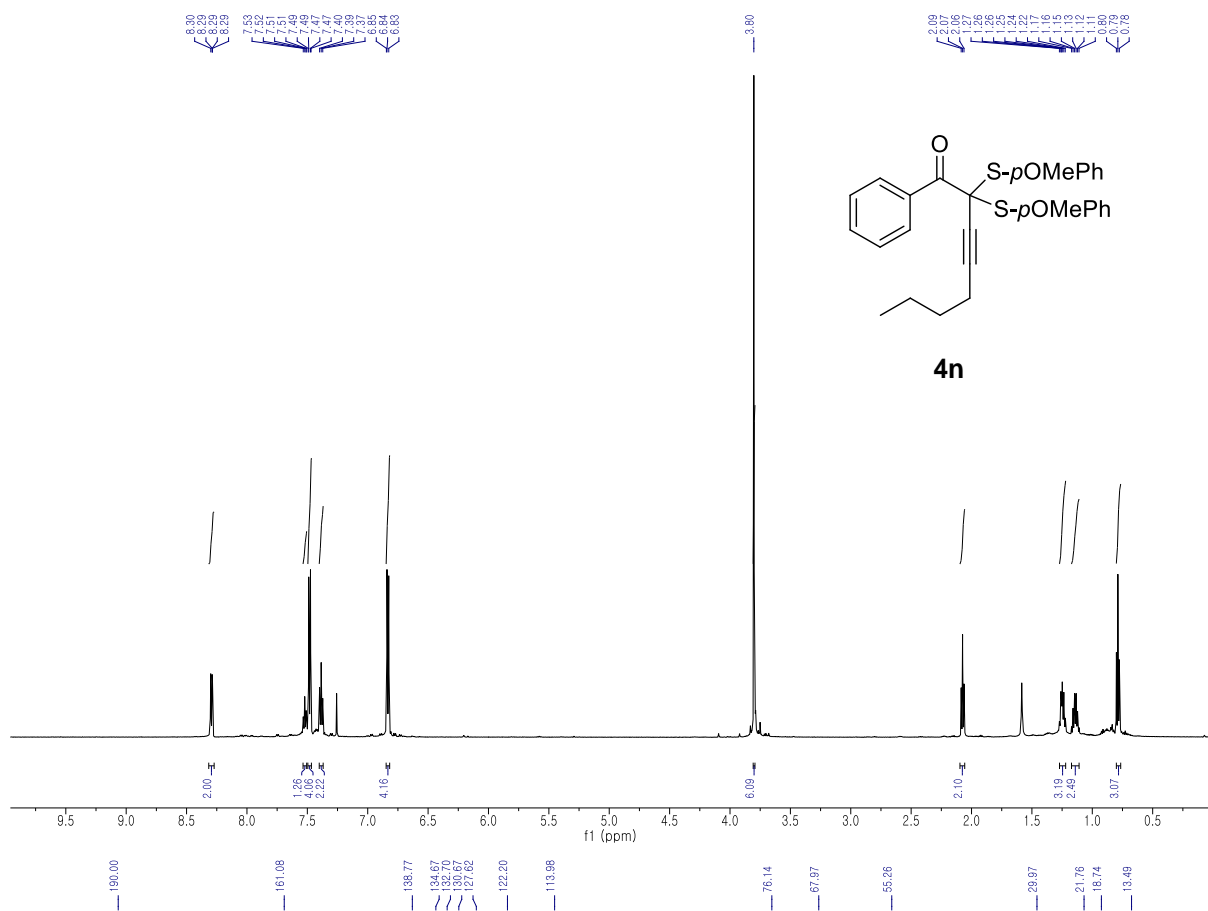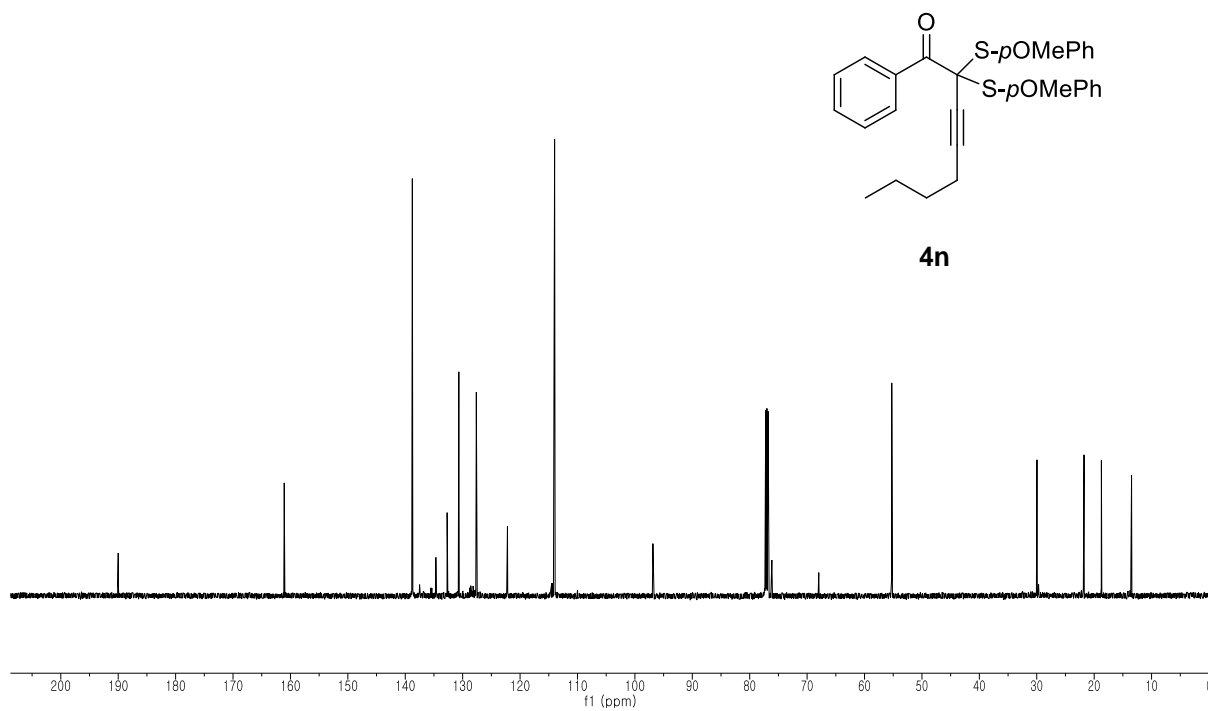



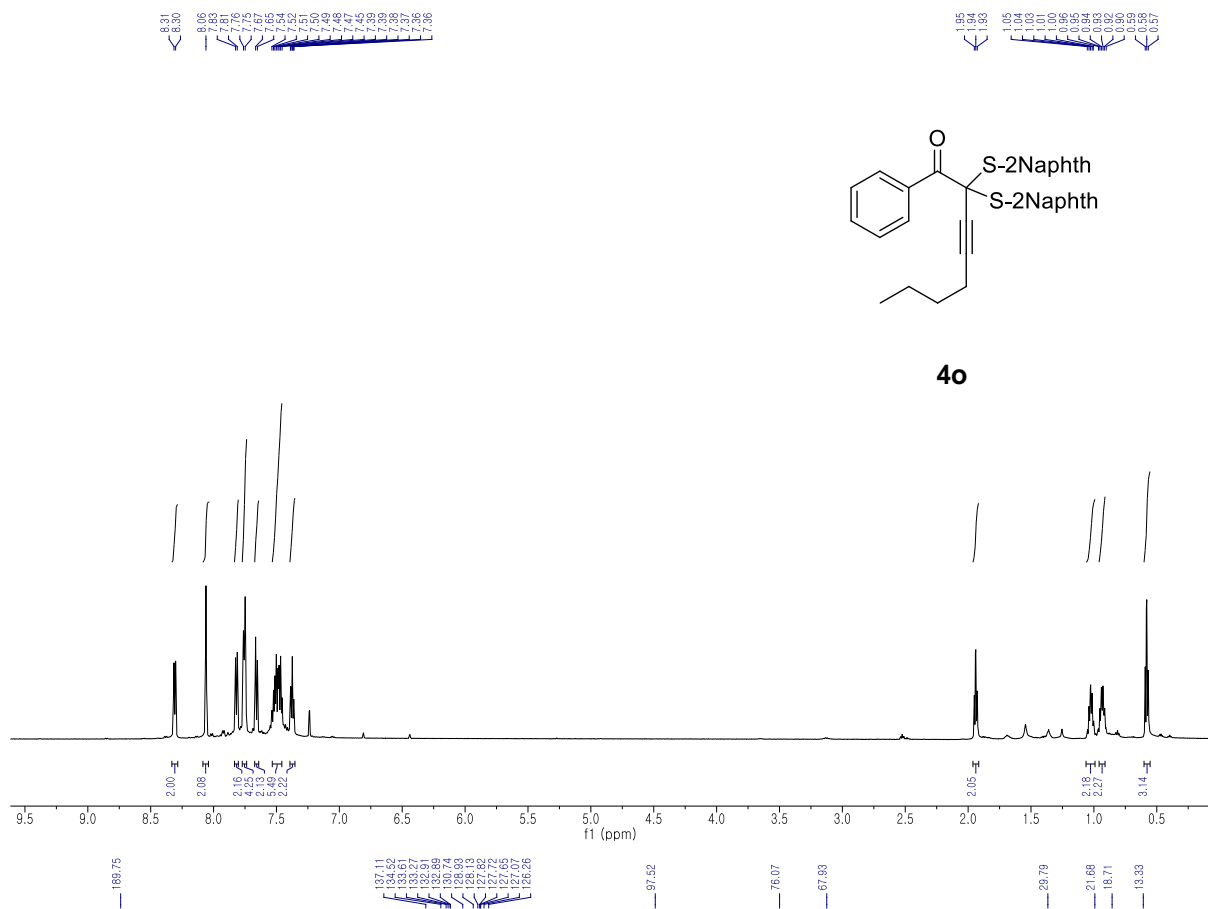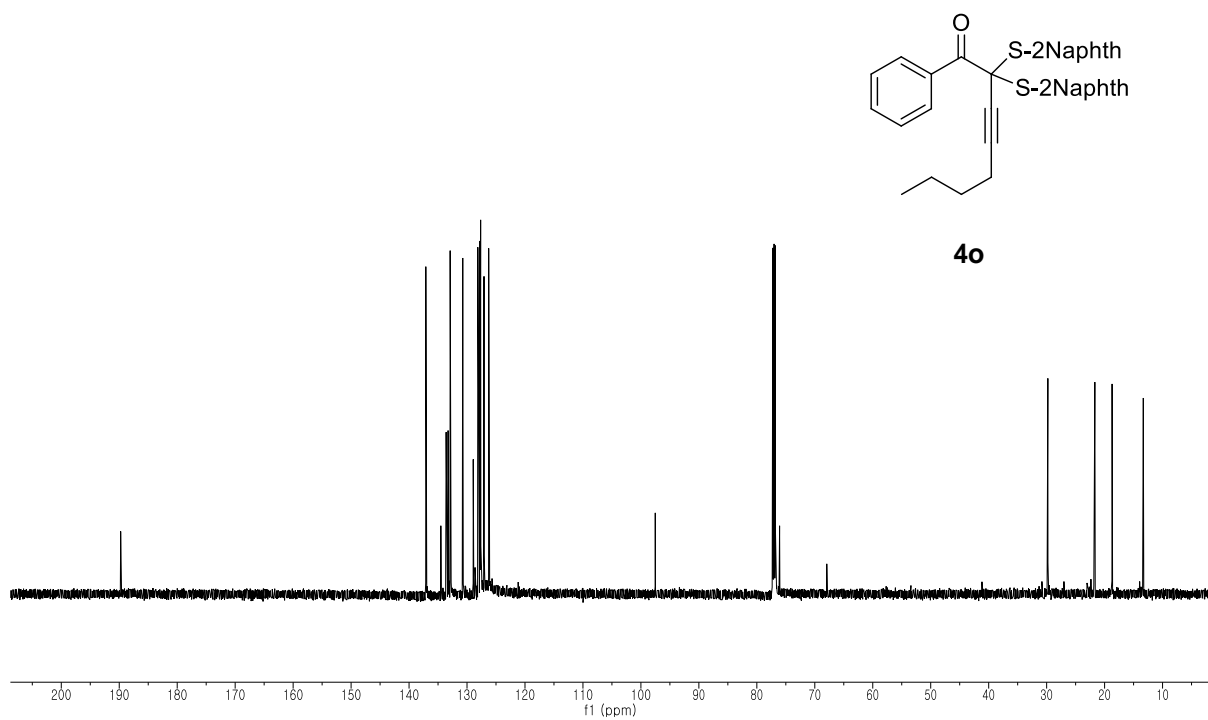

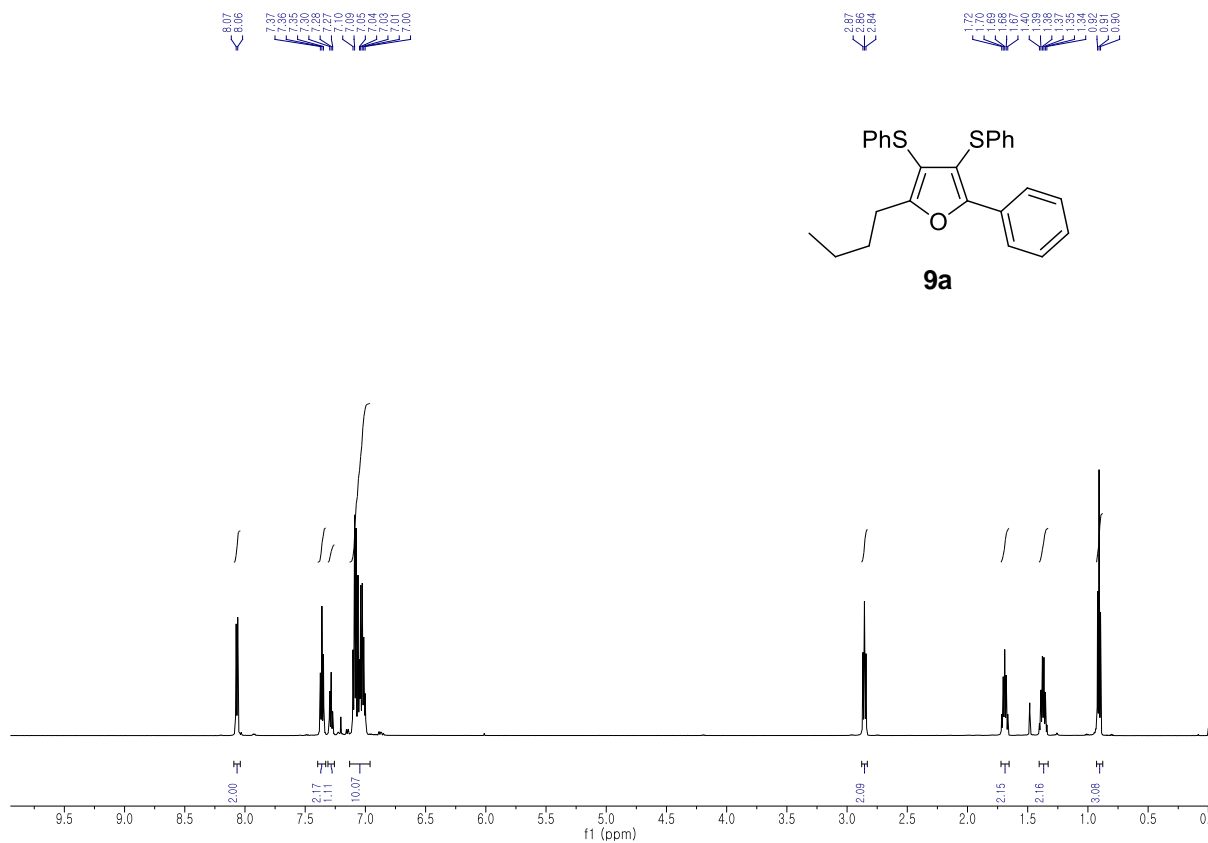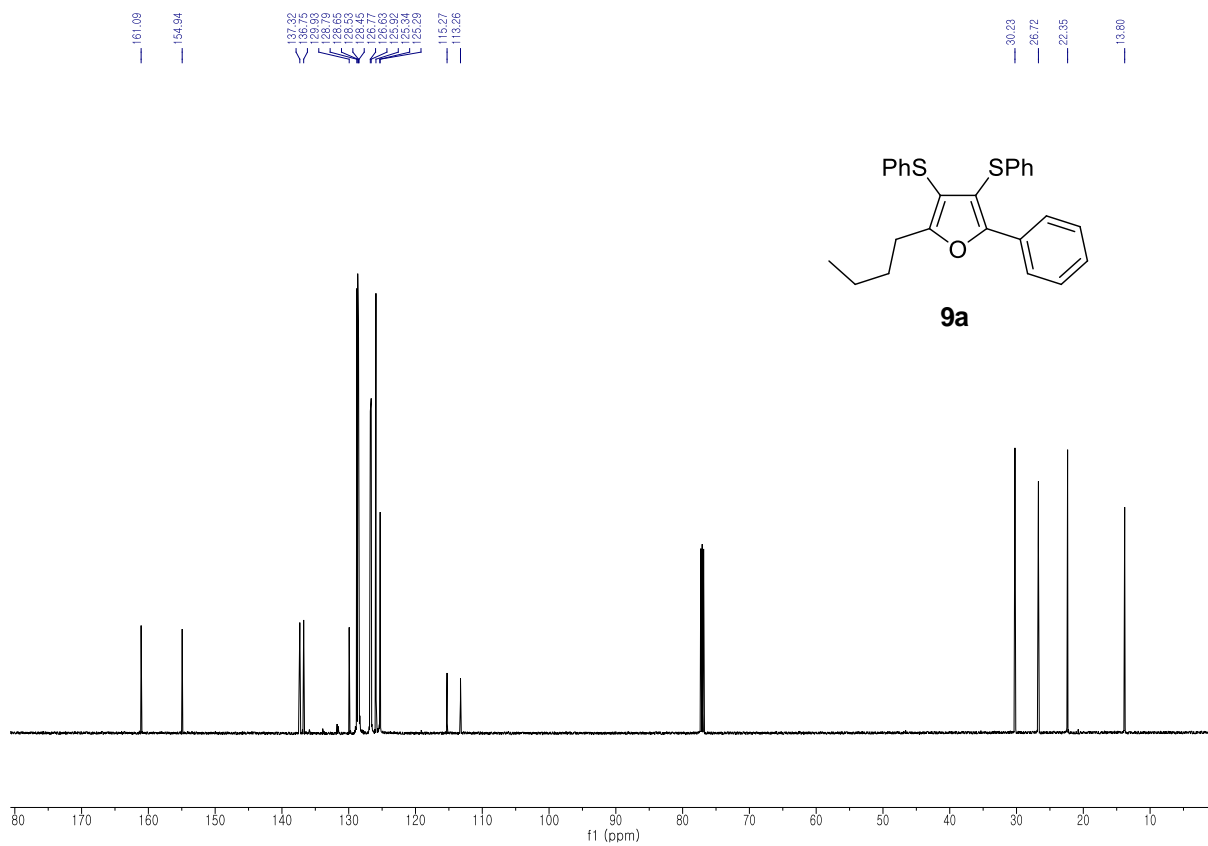

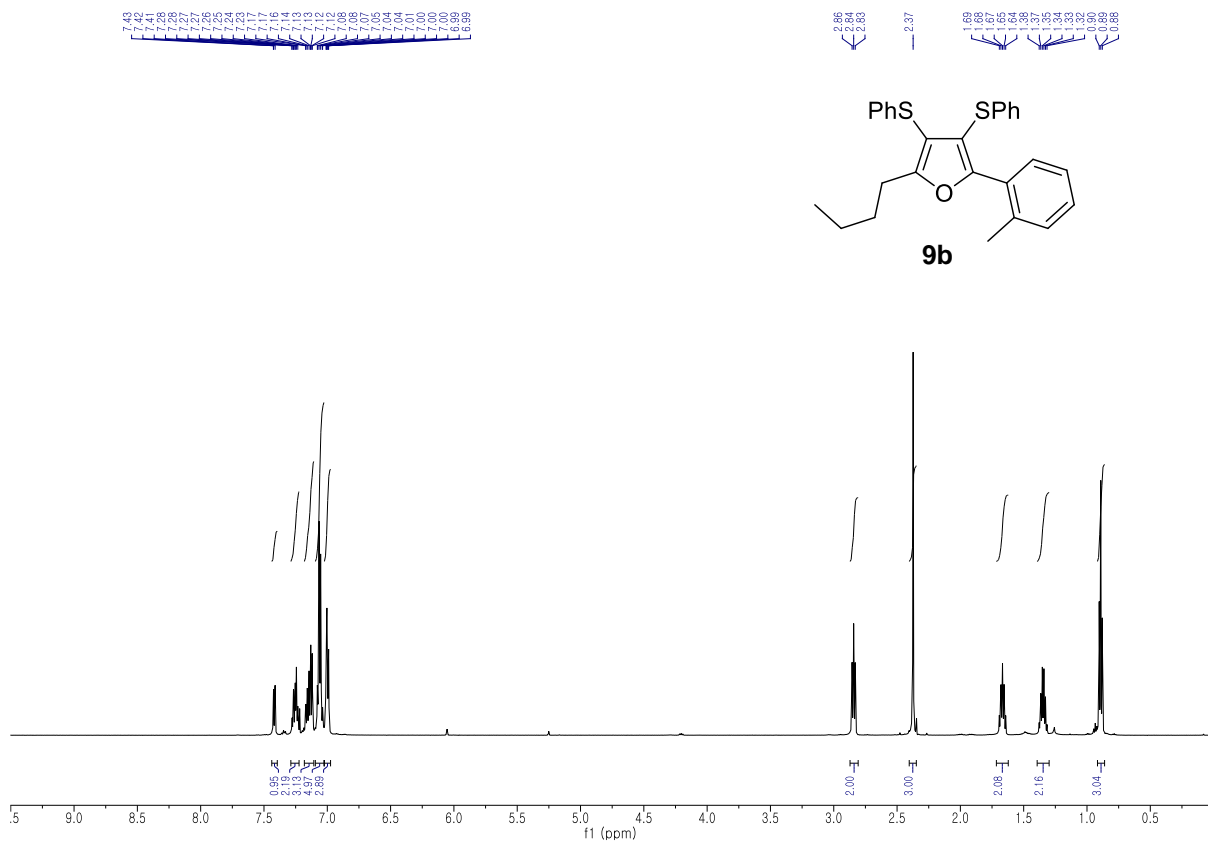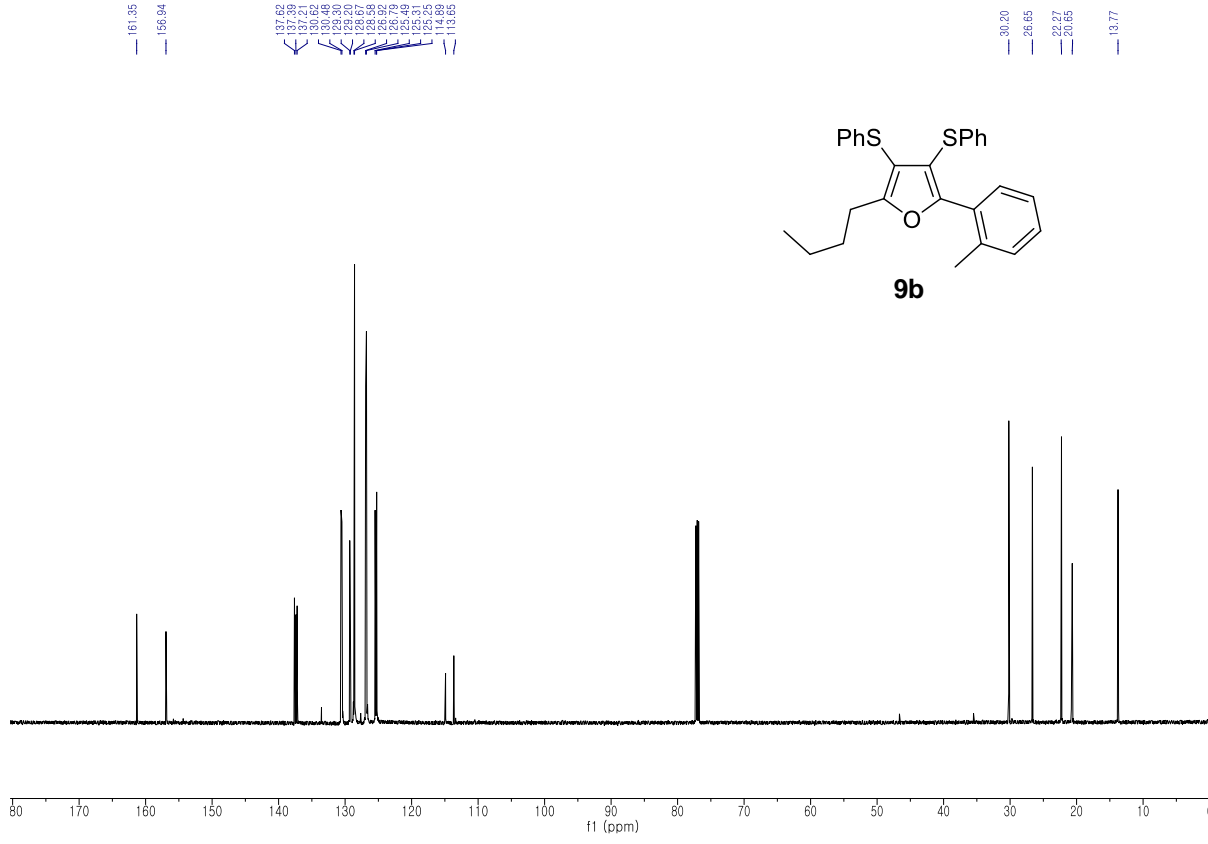

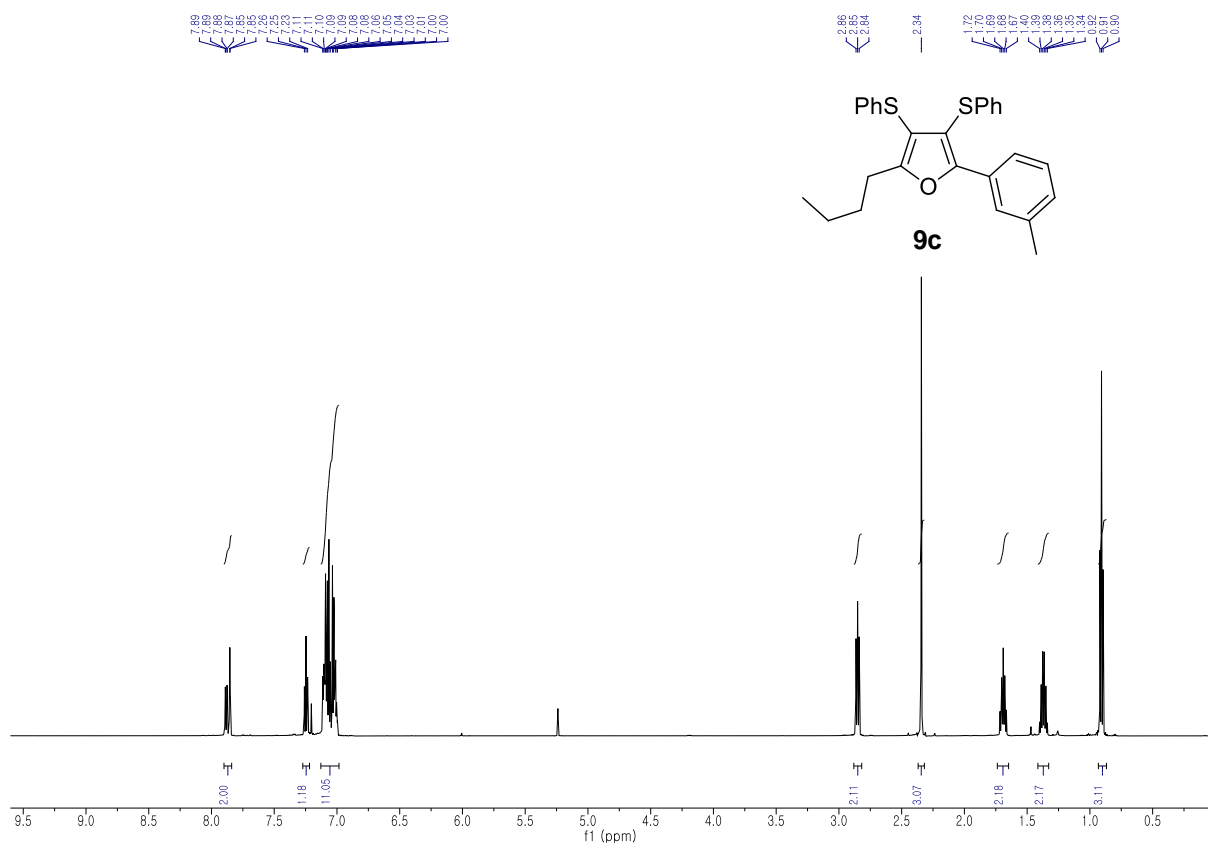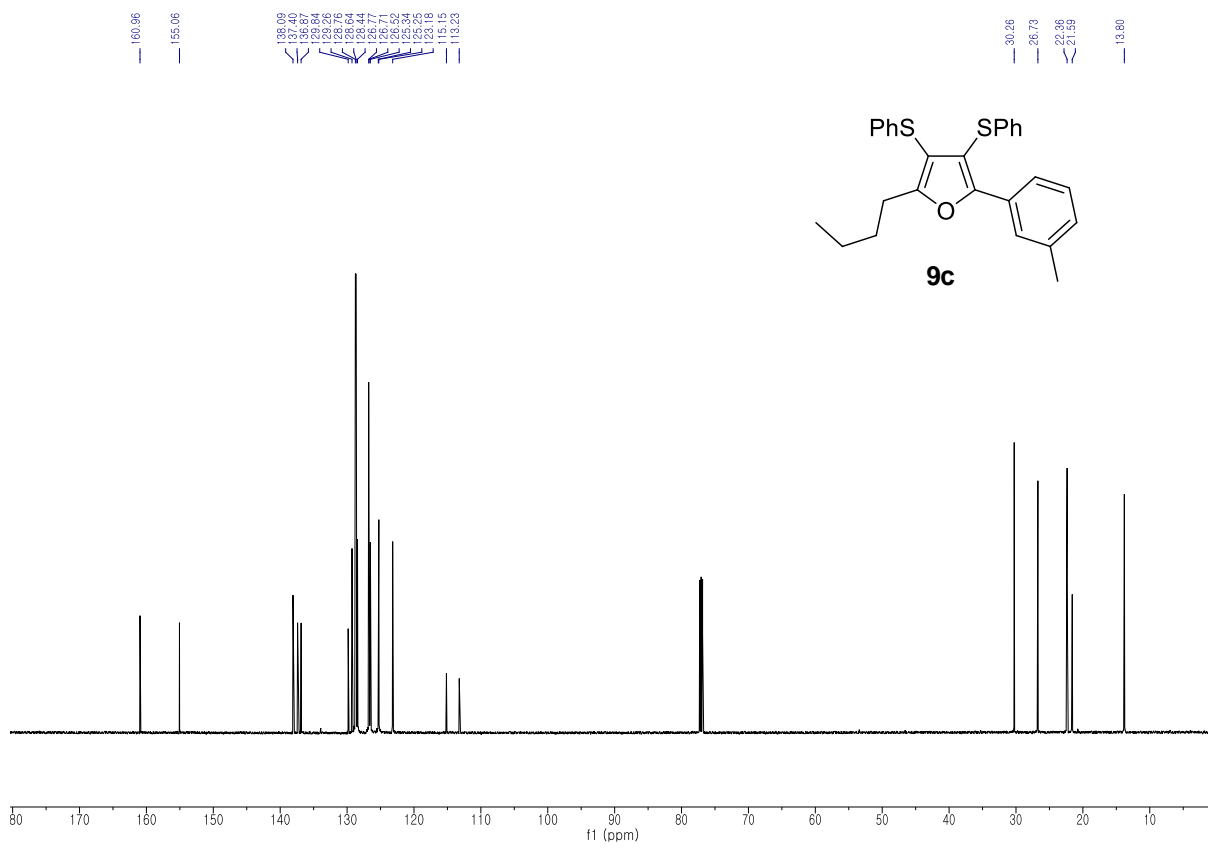

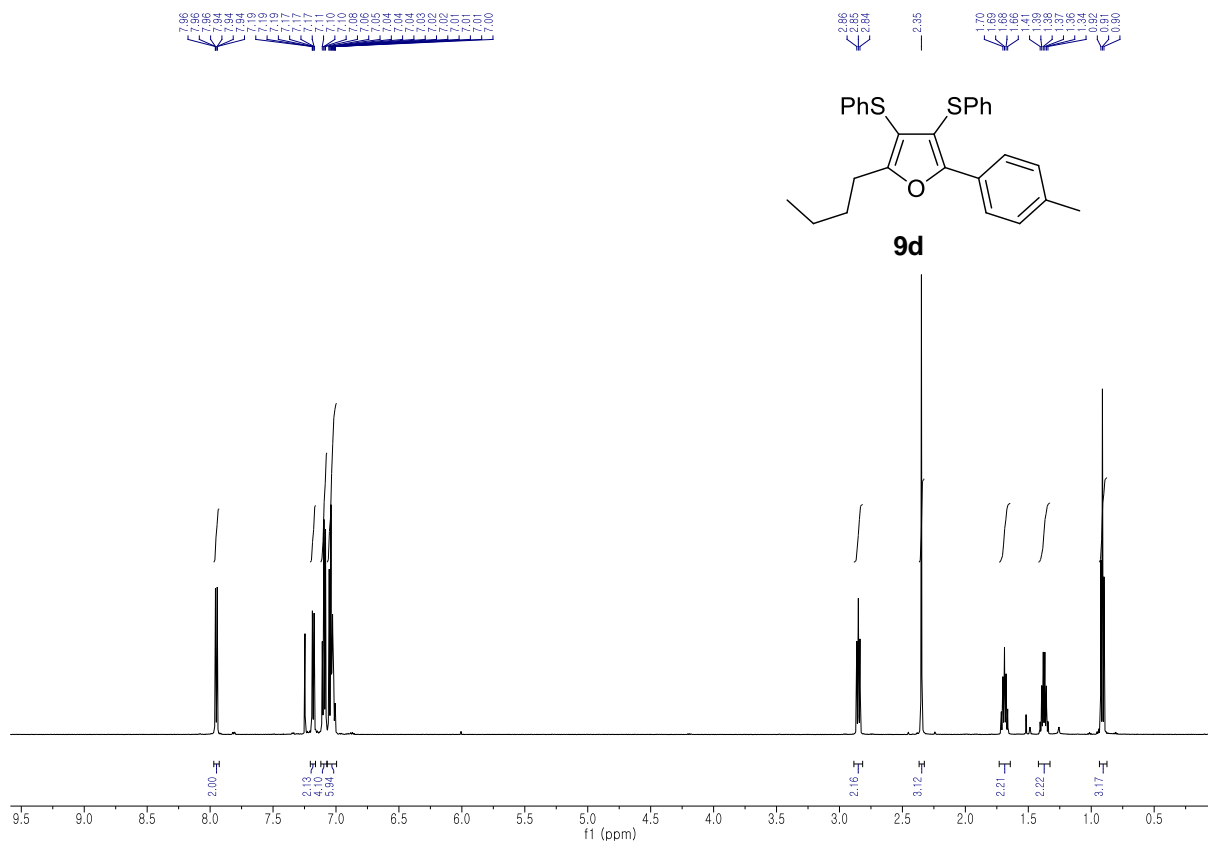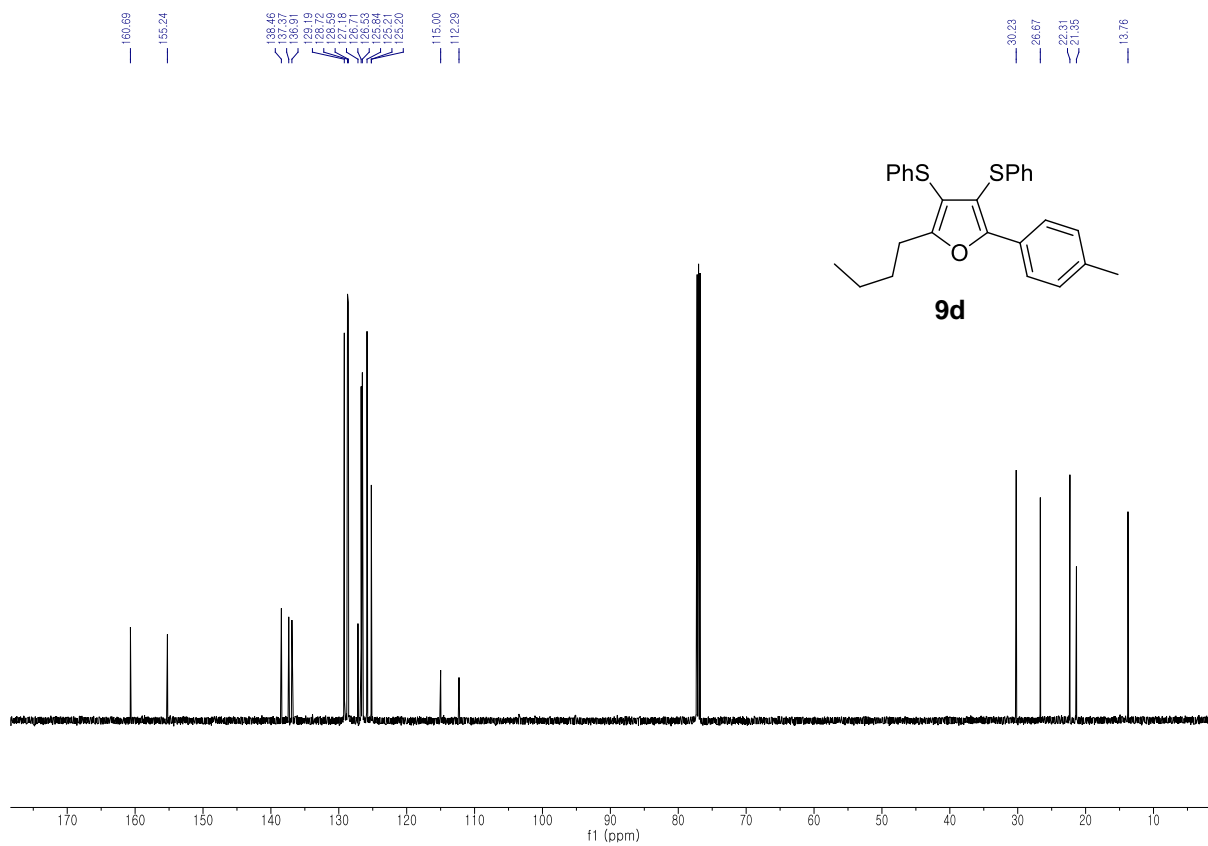

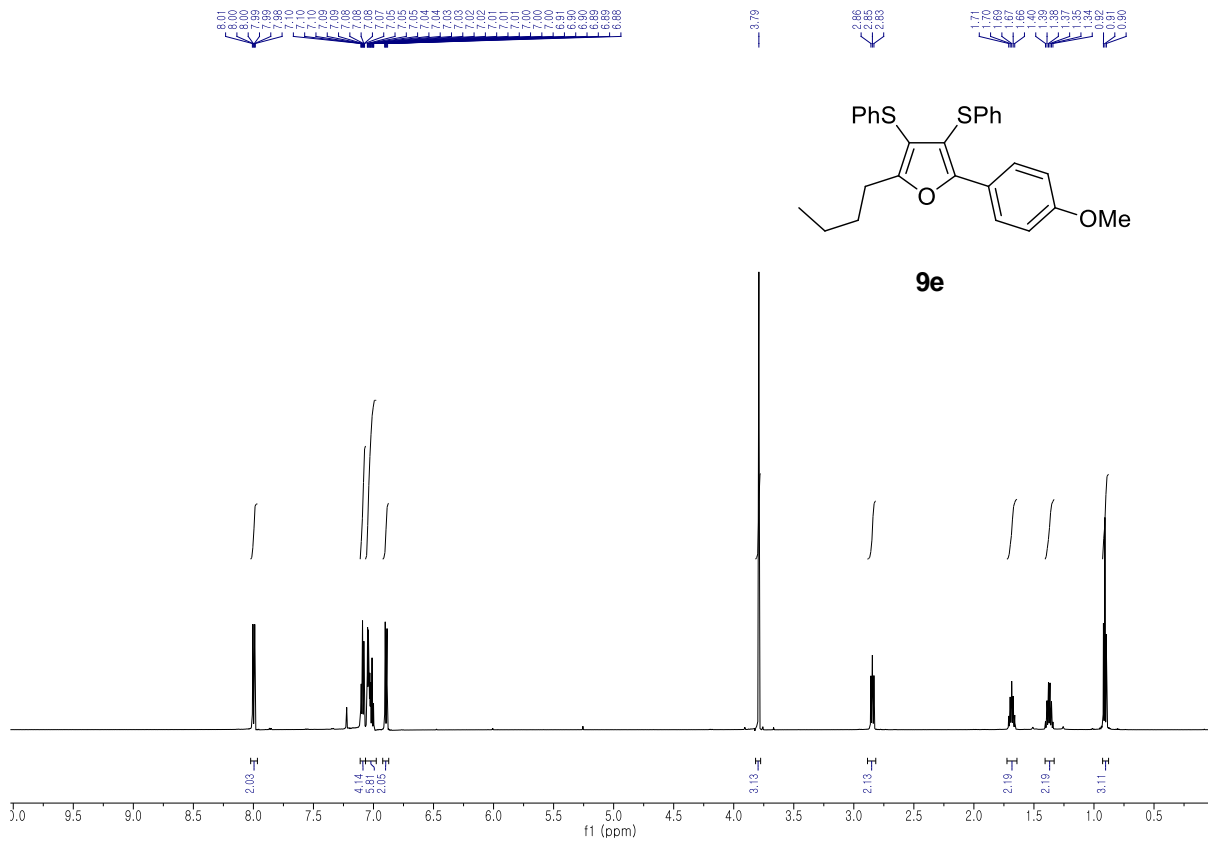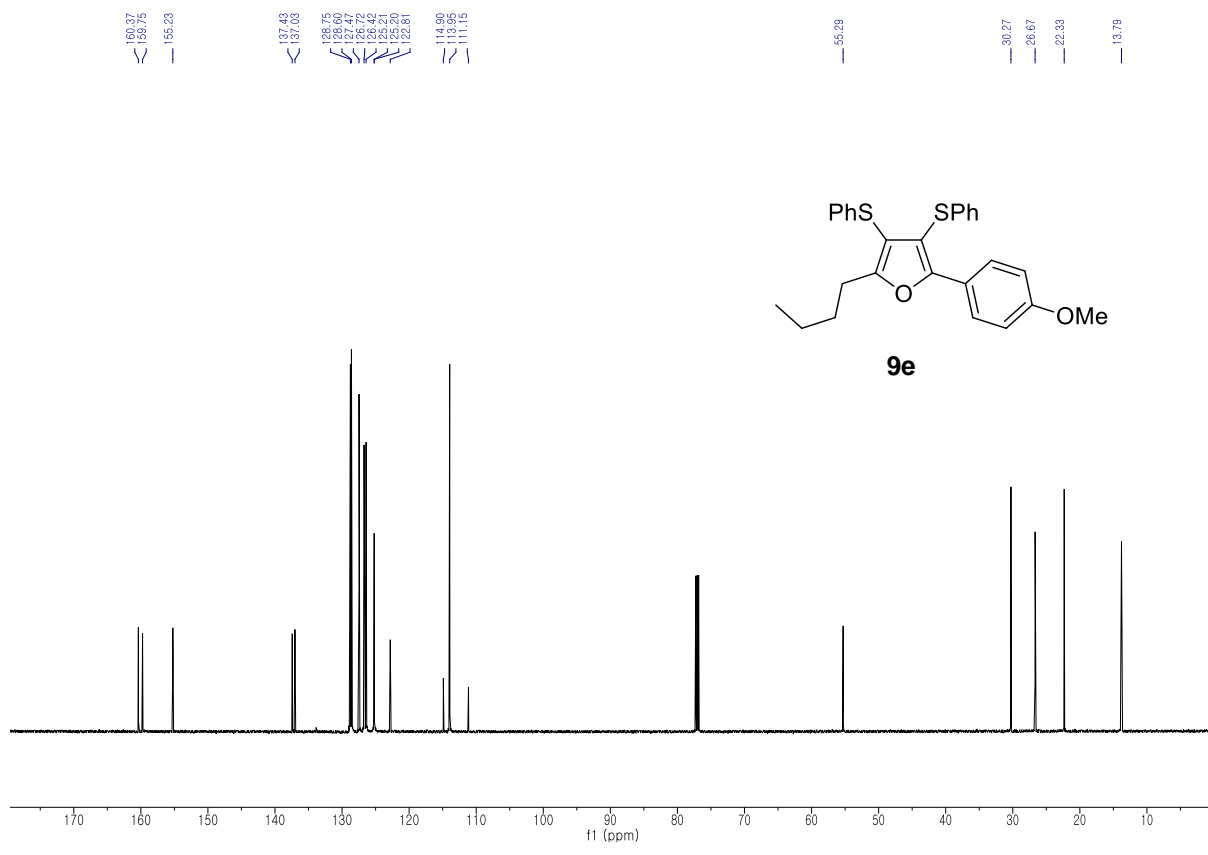



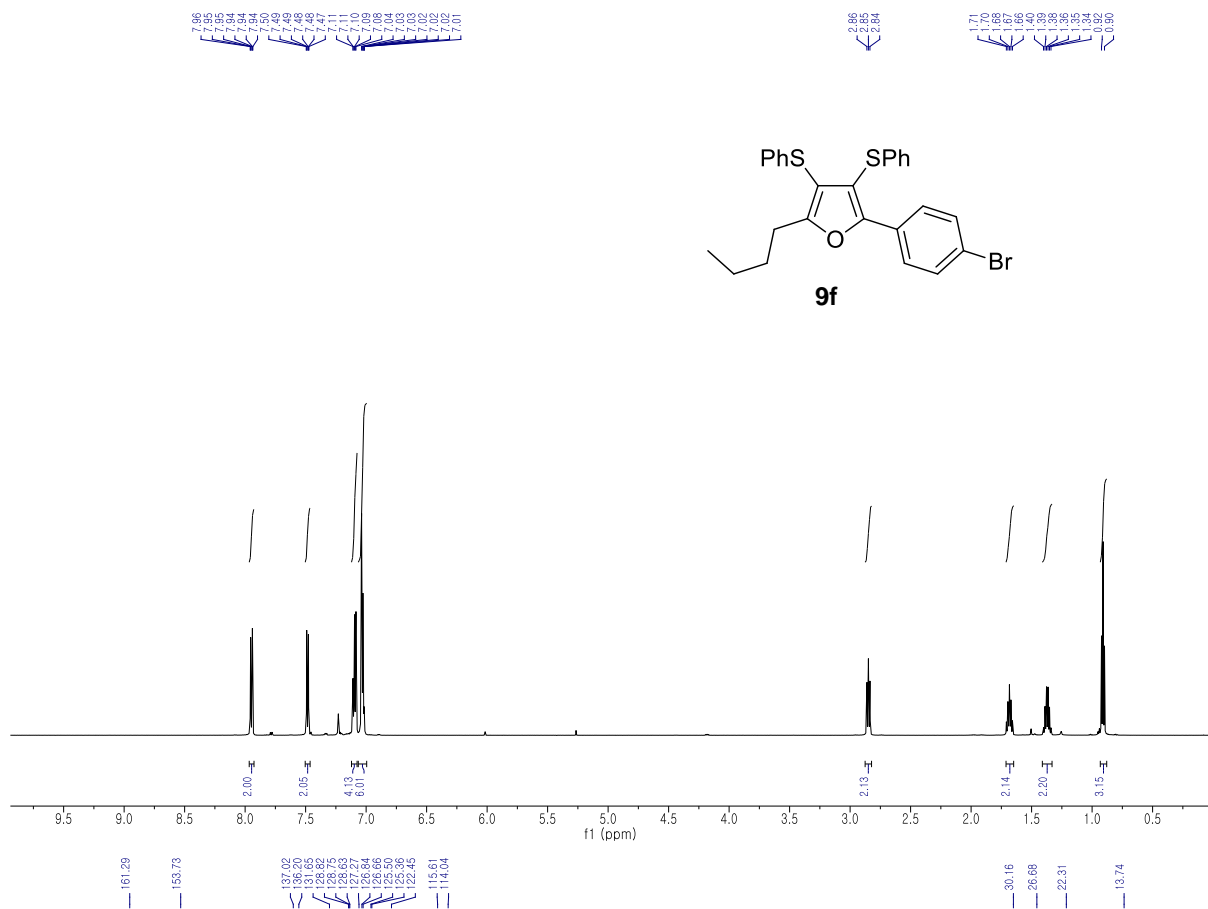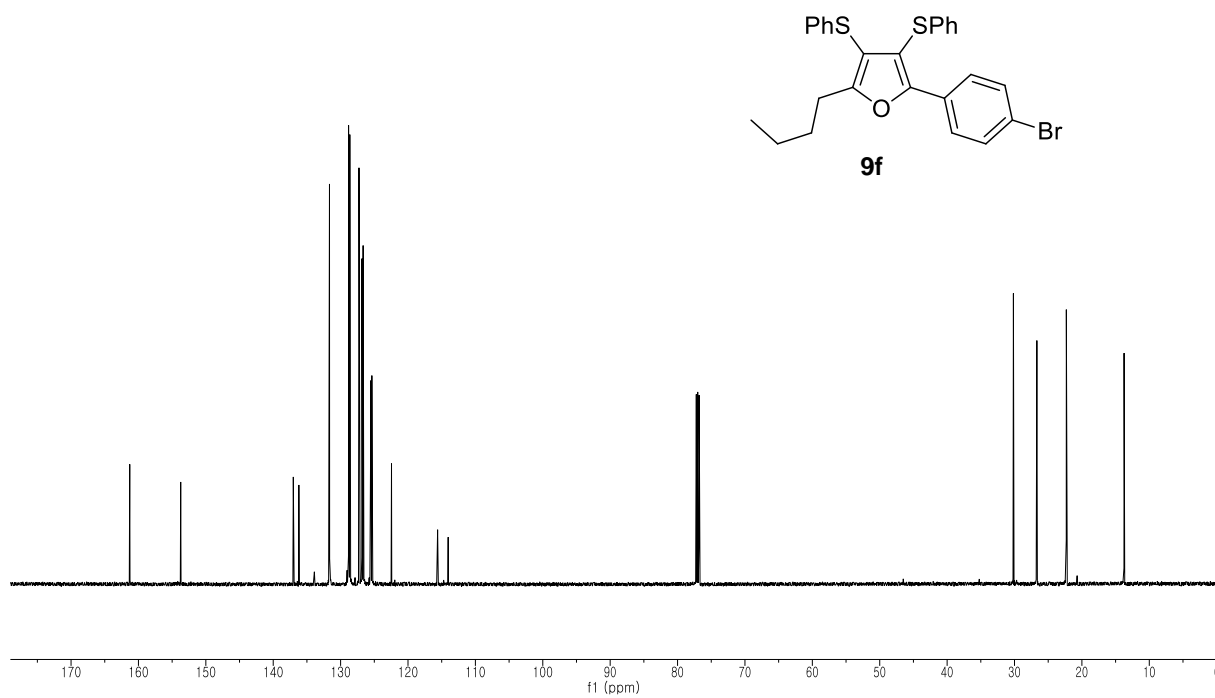

7.11  
7.11  
7.10  
7.08  
7.08  
7.03  
7.02  
7.01  
7.00  
6.99

2.80  
2.77  
2.76  
2.75  
1.64  
1.63  
1.62  
1.59  
1.59  
1.36  
1.35  
1.32  
1.31  
1.22  
1.21  
0.90  
0.89  
0.88

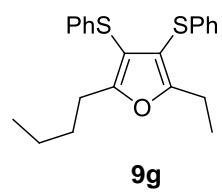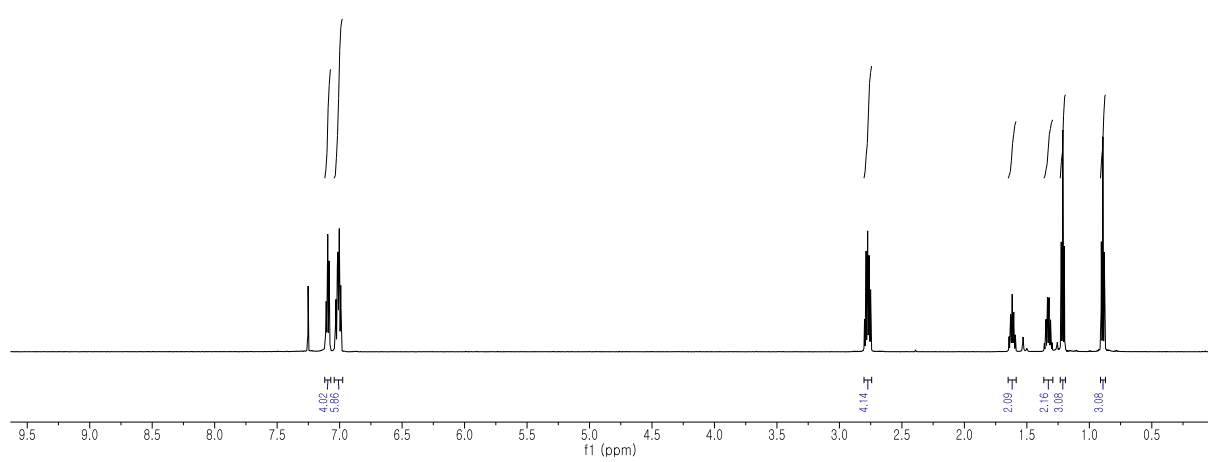

161.15  
160.25  
137.60  
137.56  
128.56  
128.21  
126.64  
125.11  
112.28  
111.67  
30.24  
26.56  
22.28  
20.39  
13.75  
12.62

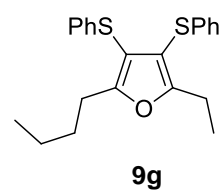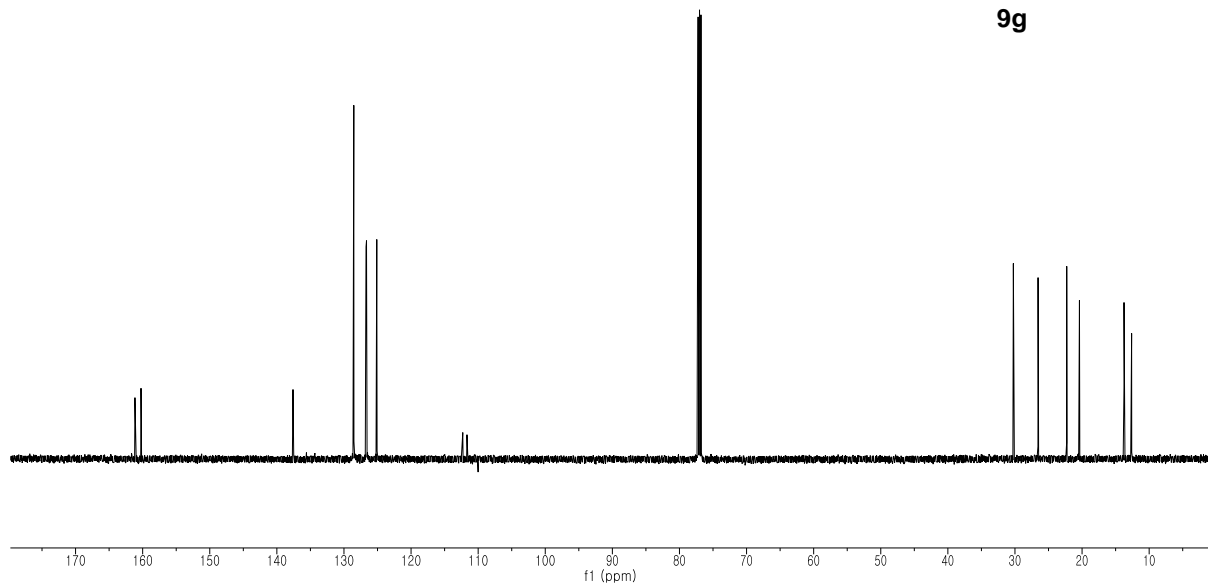

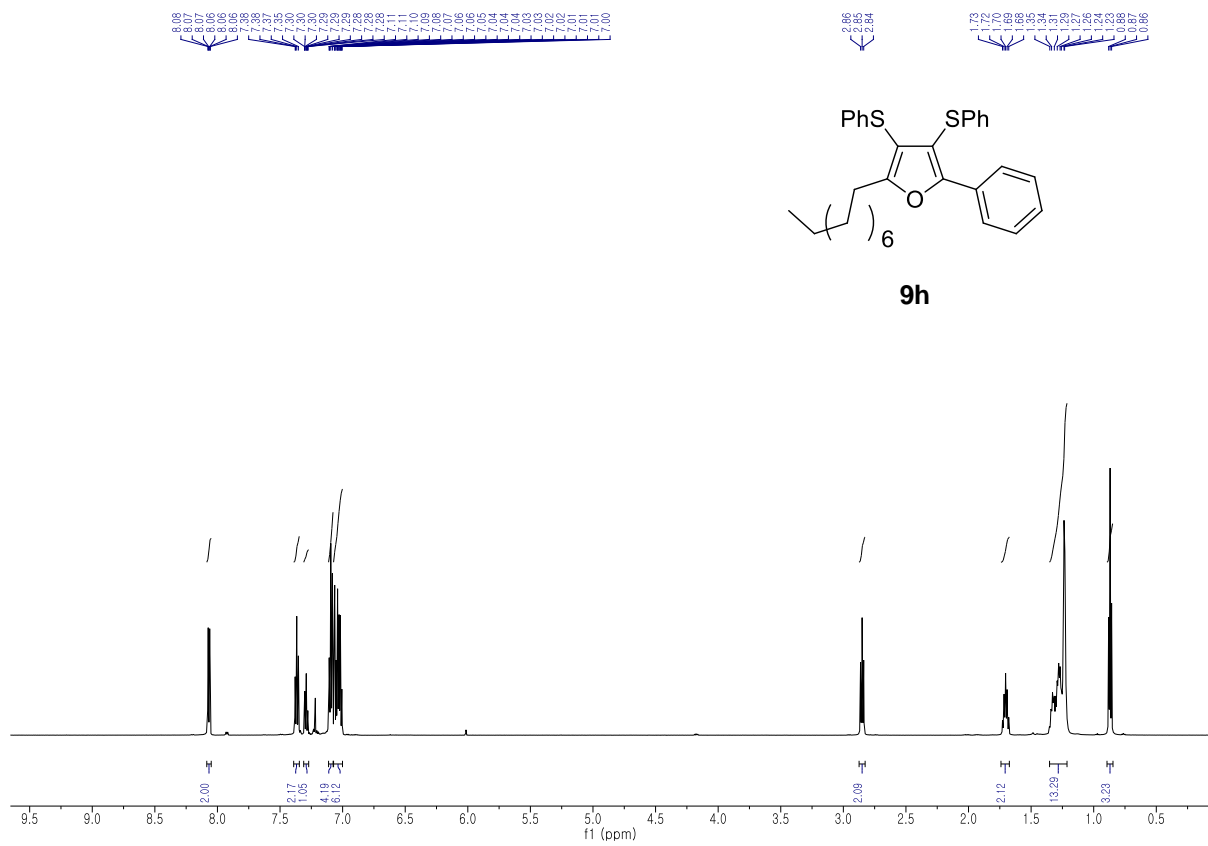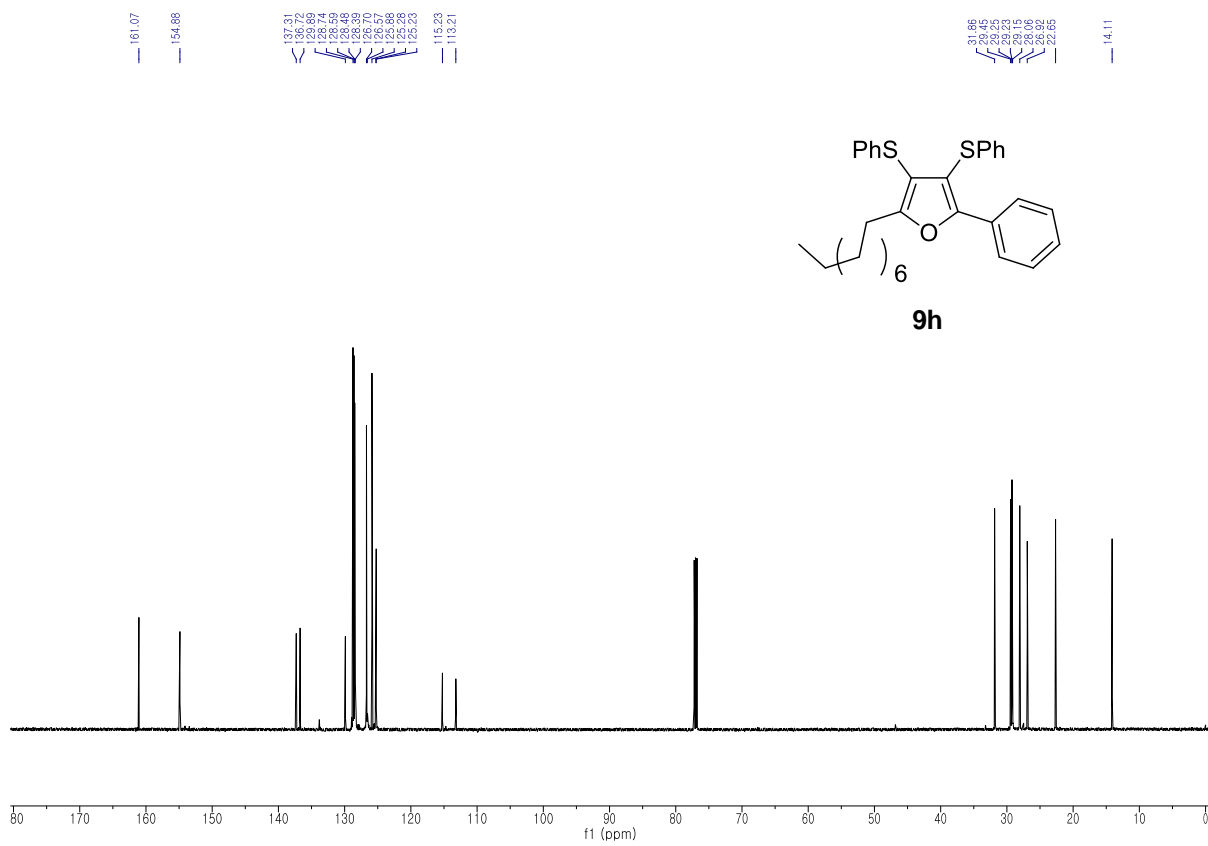





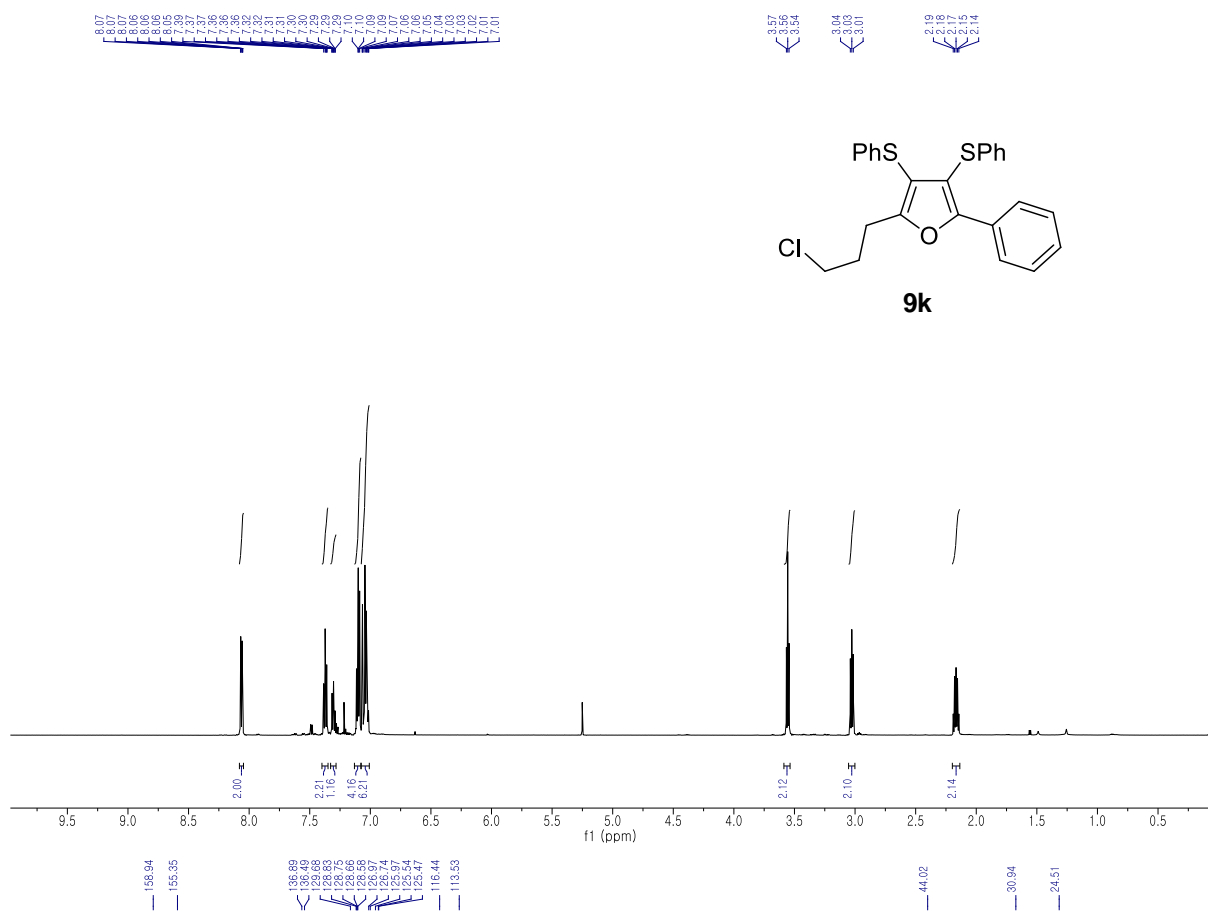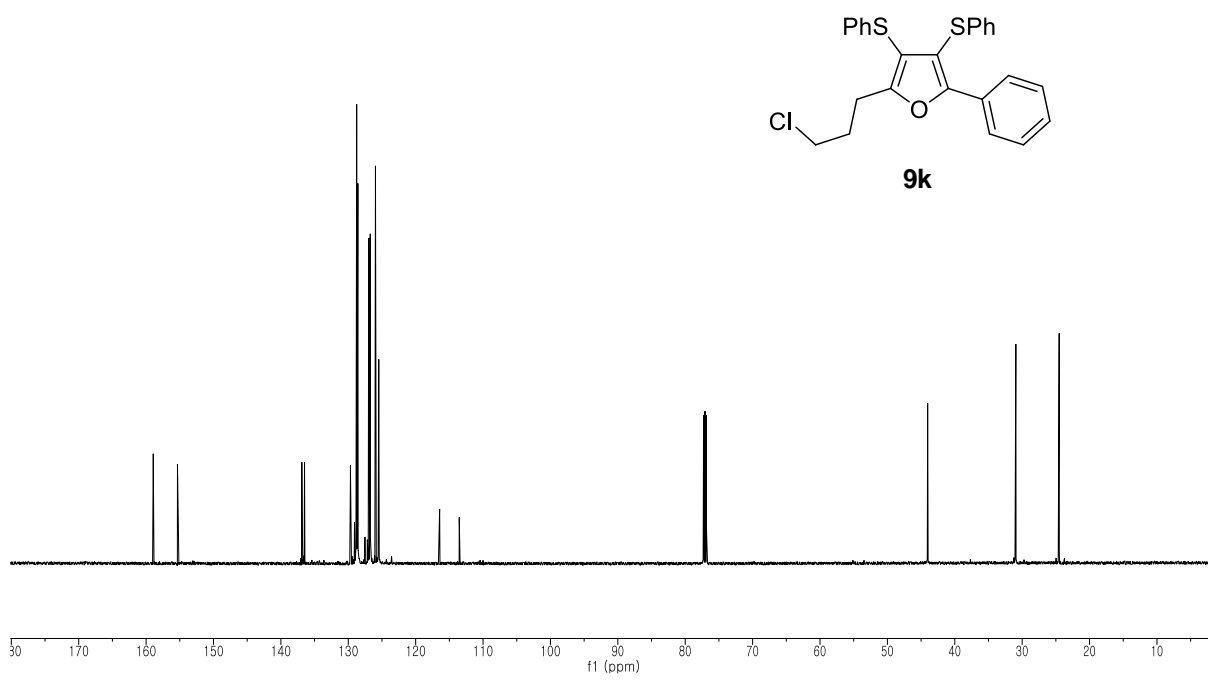

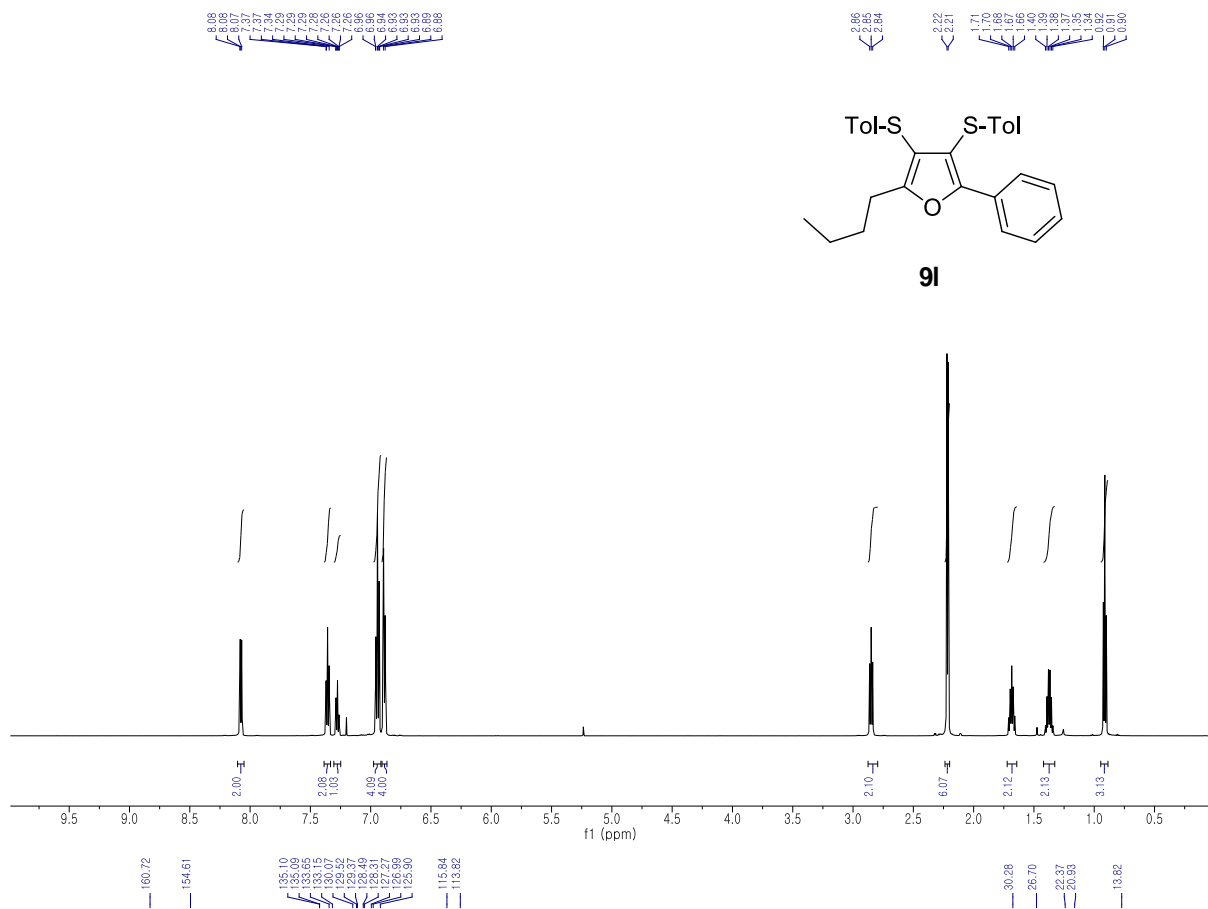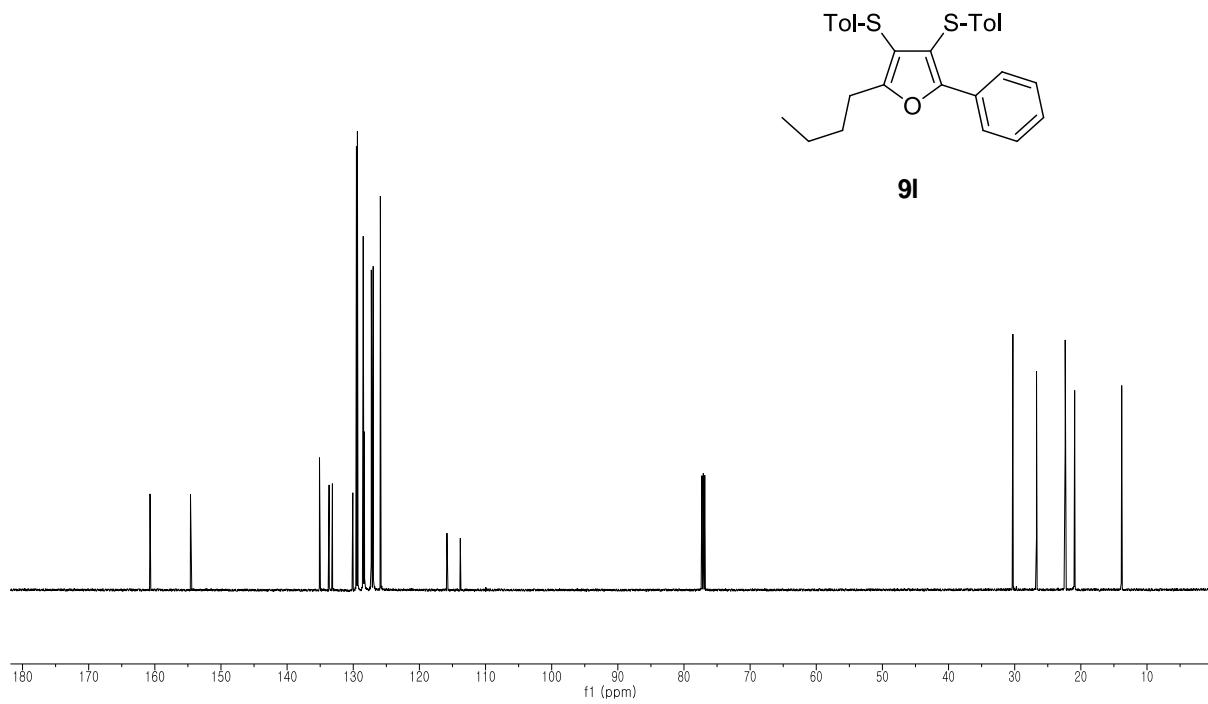

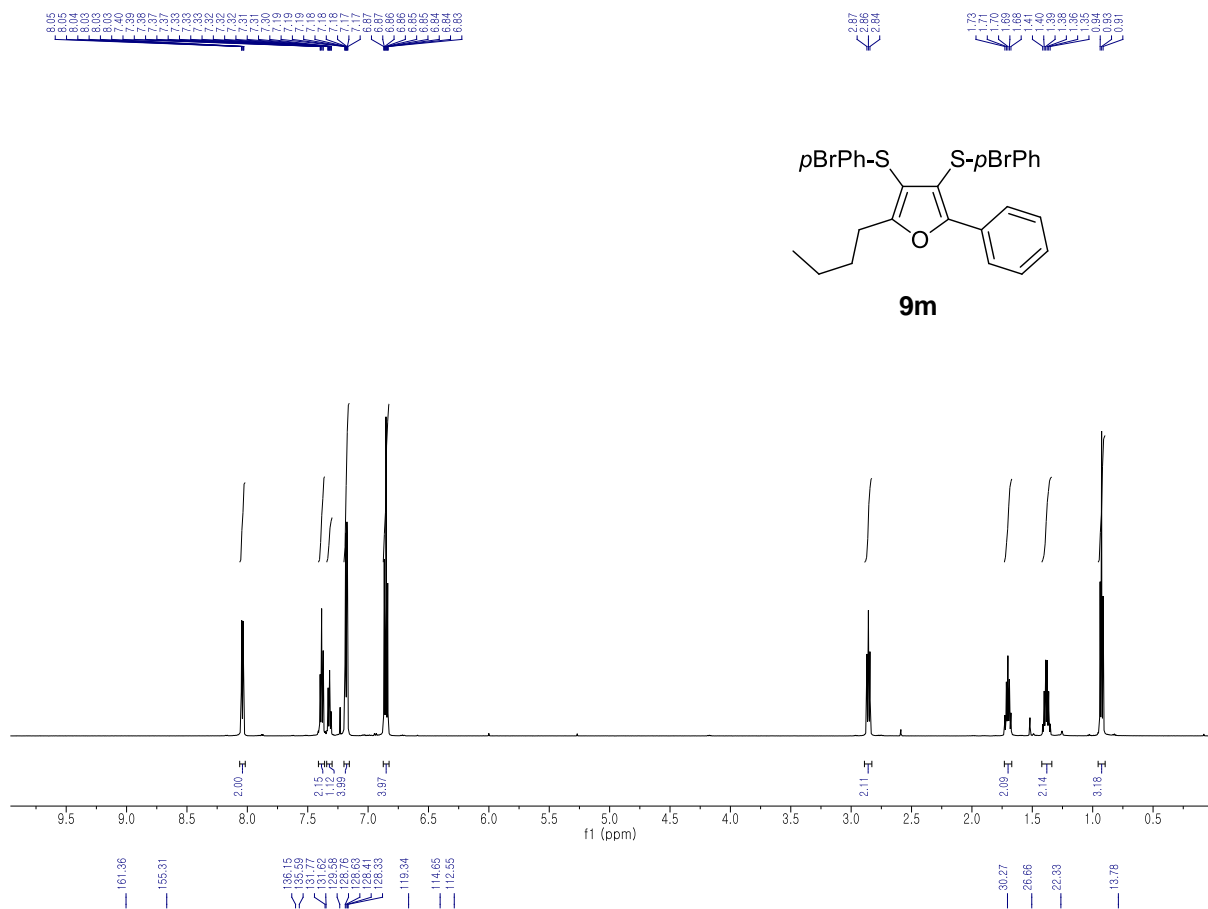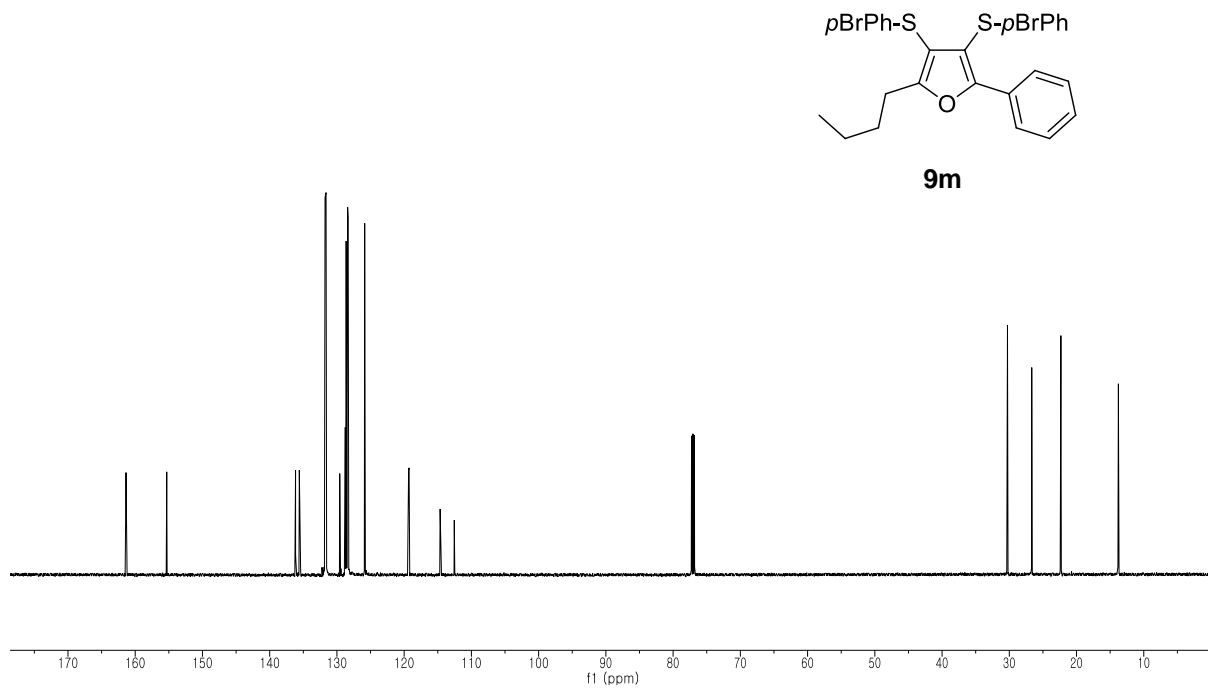



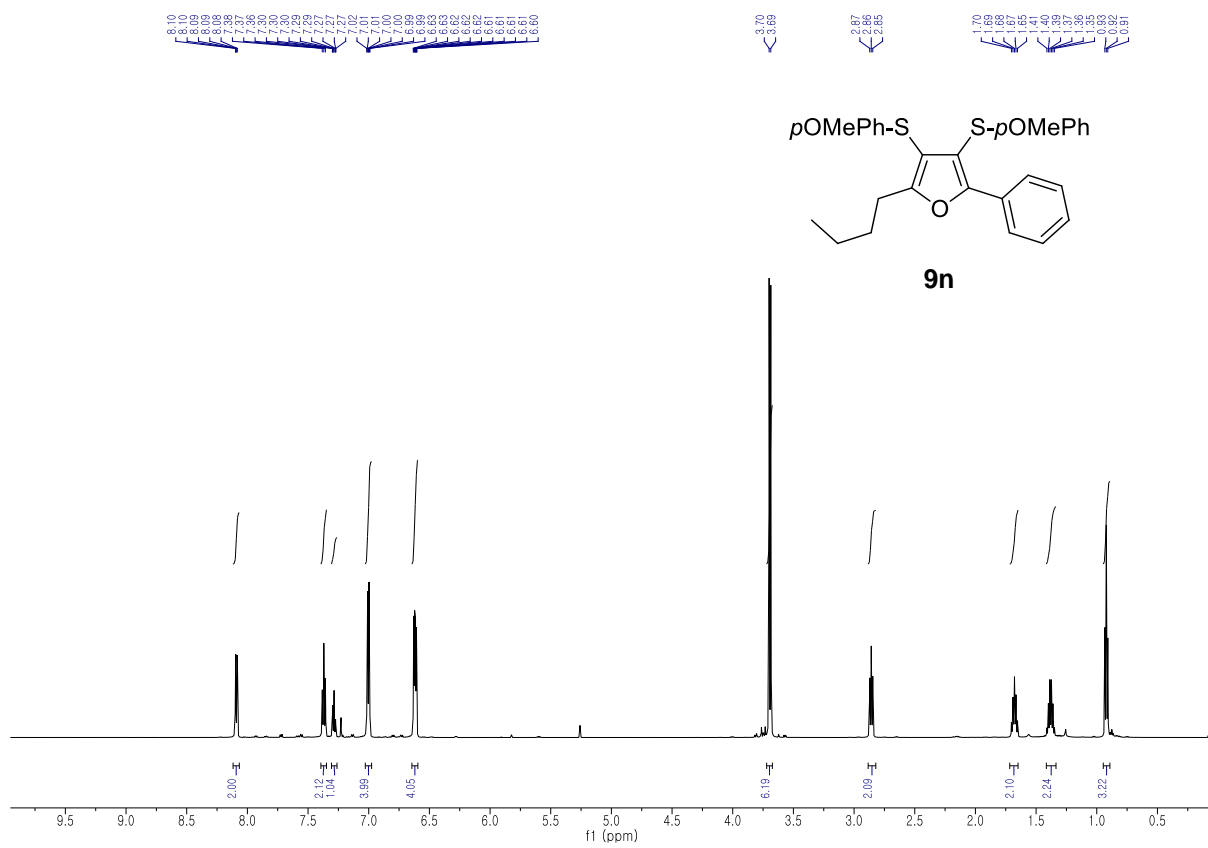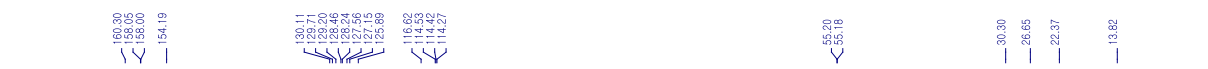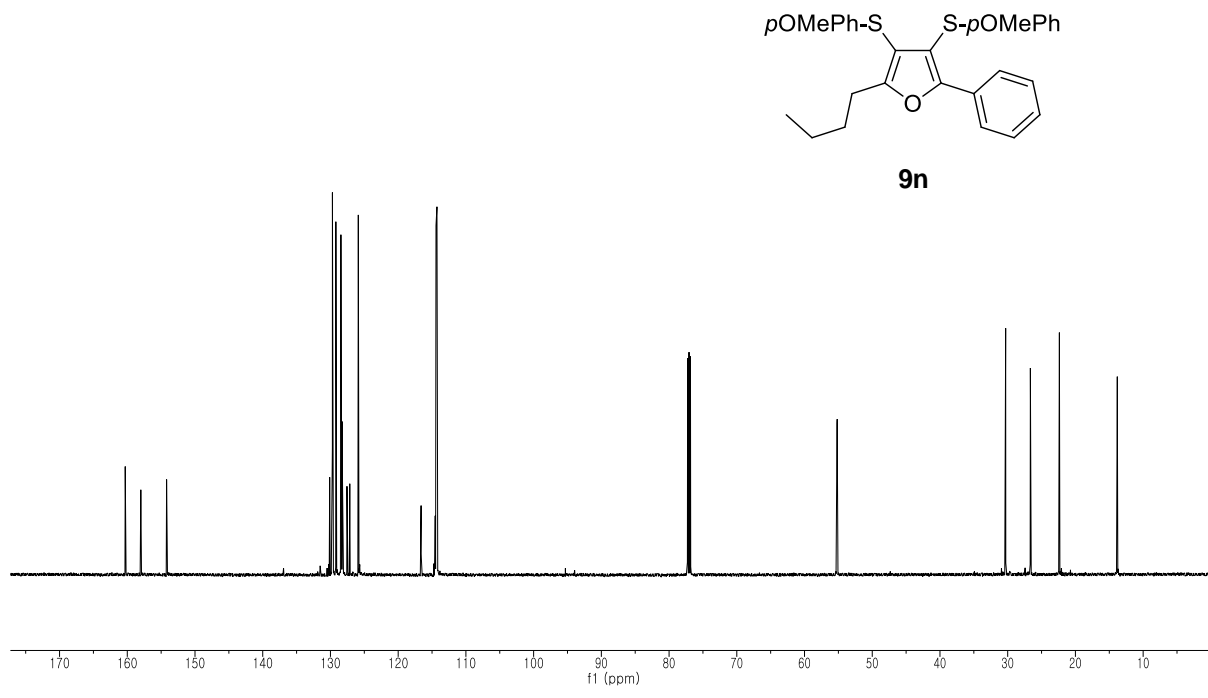

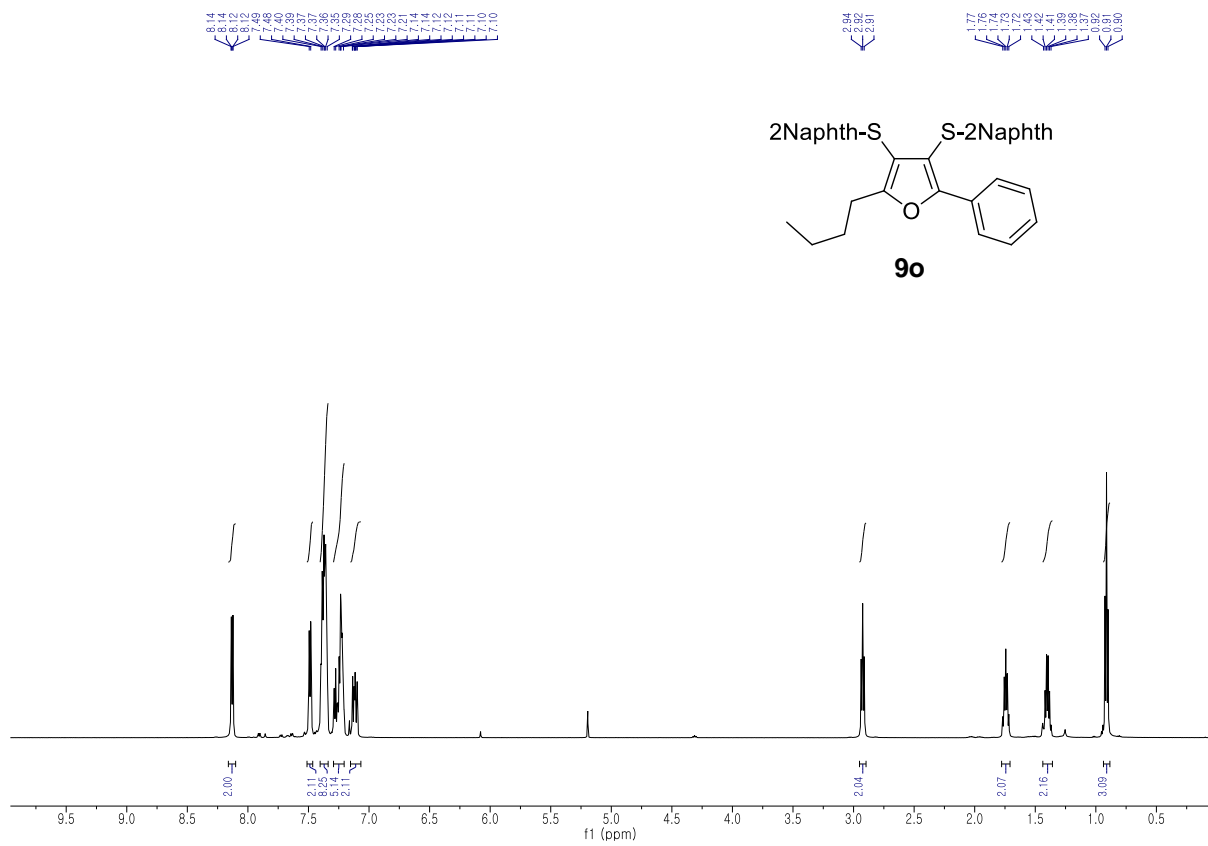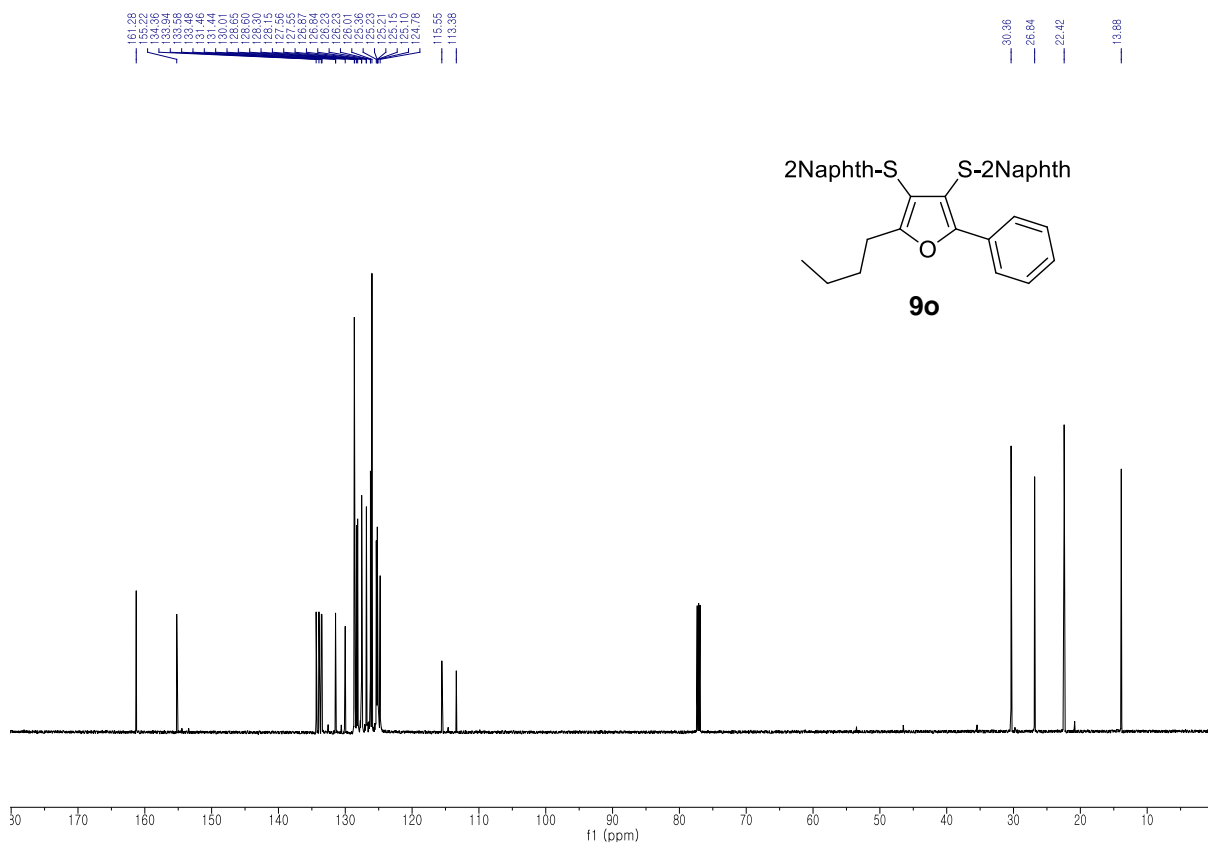

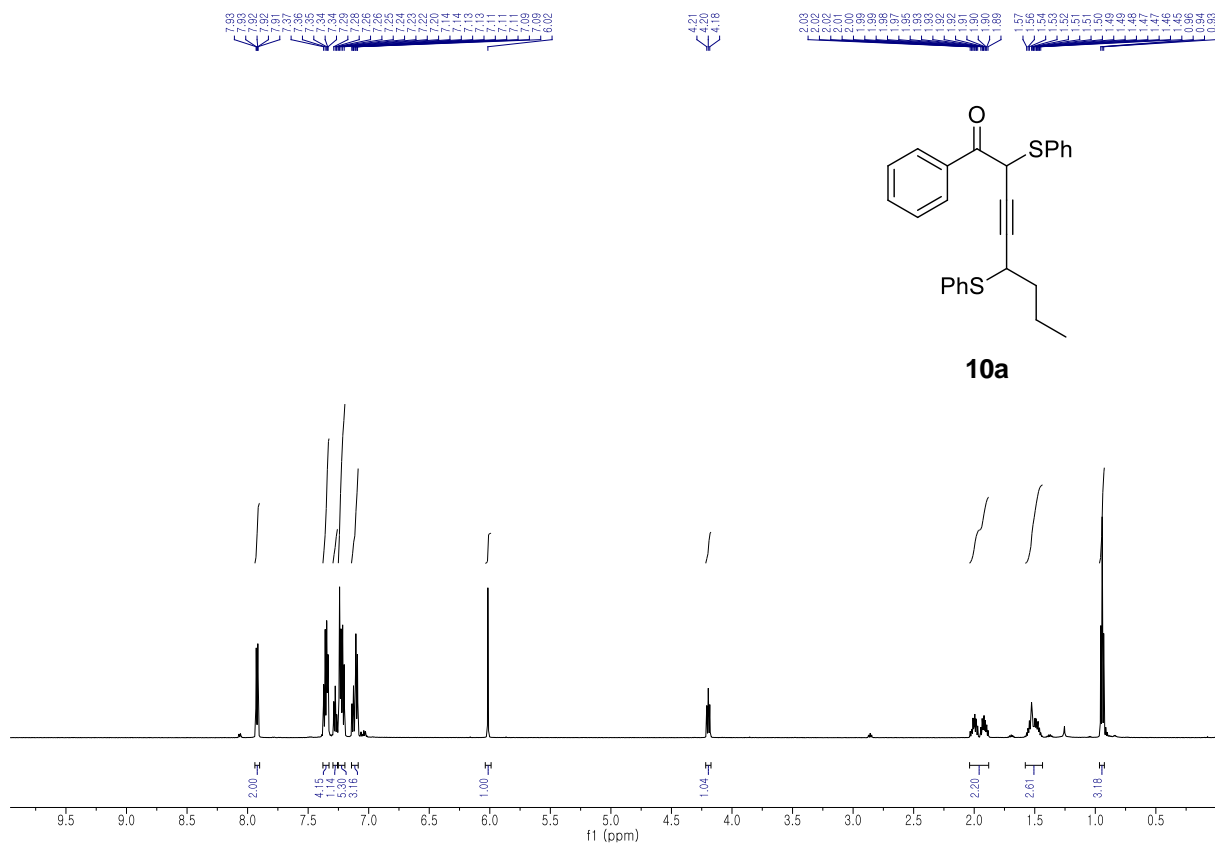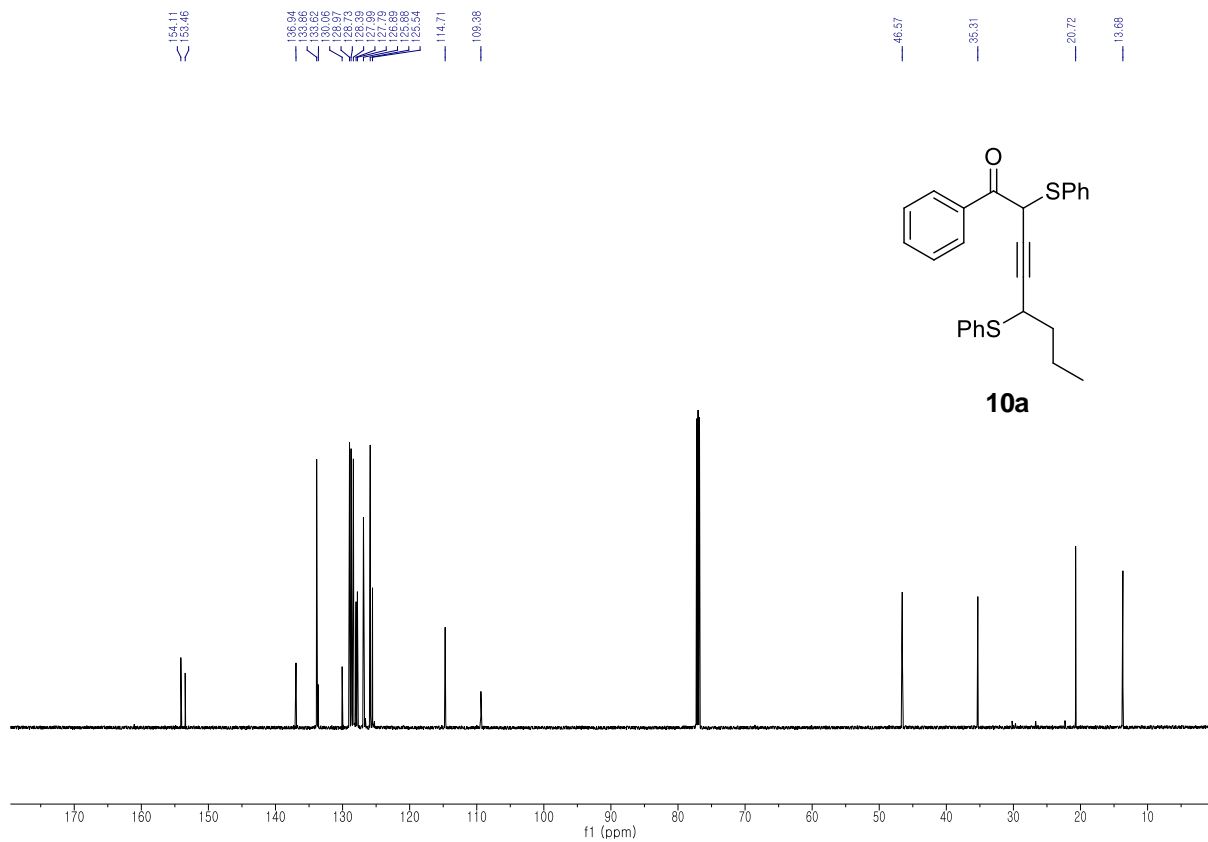

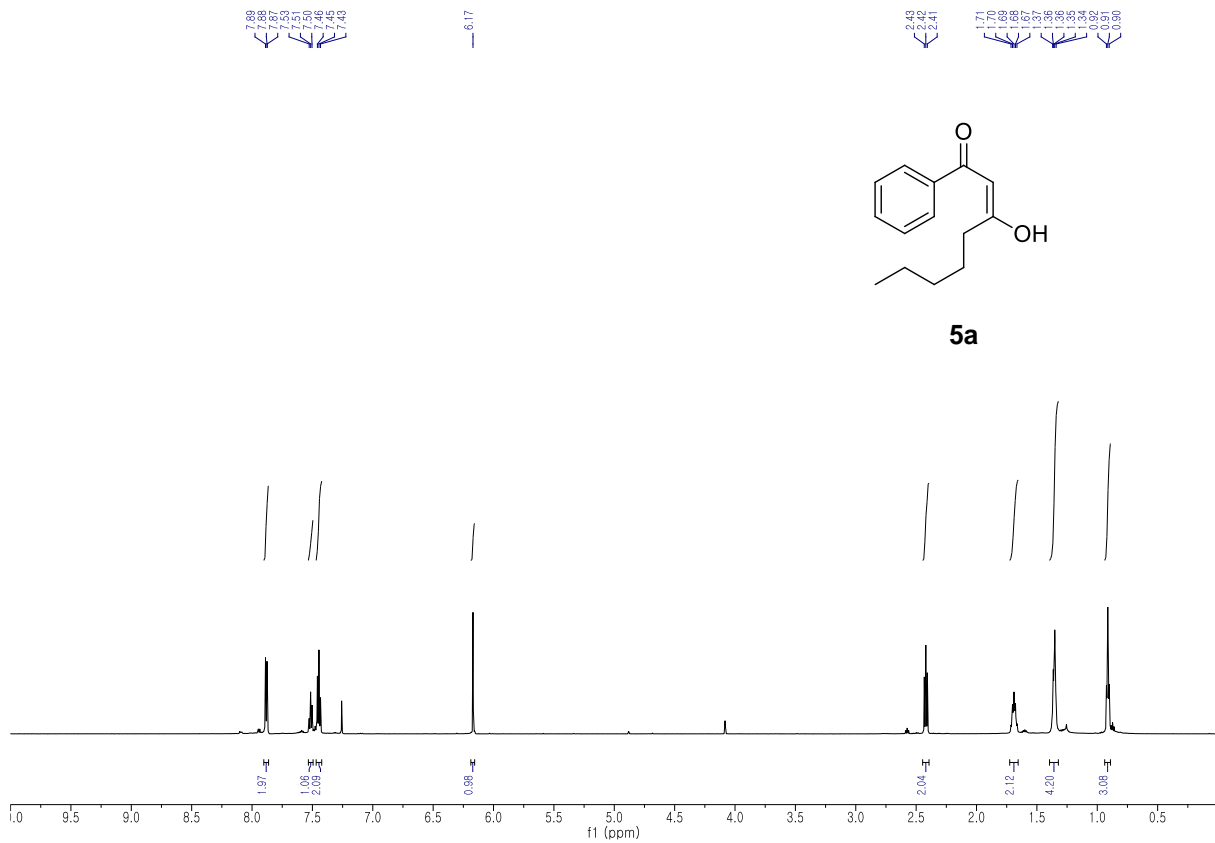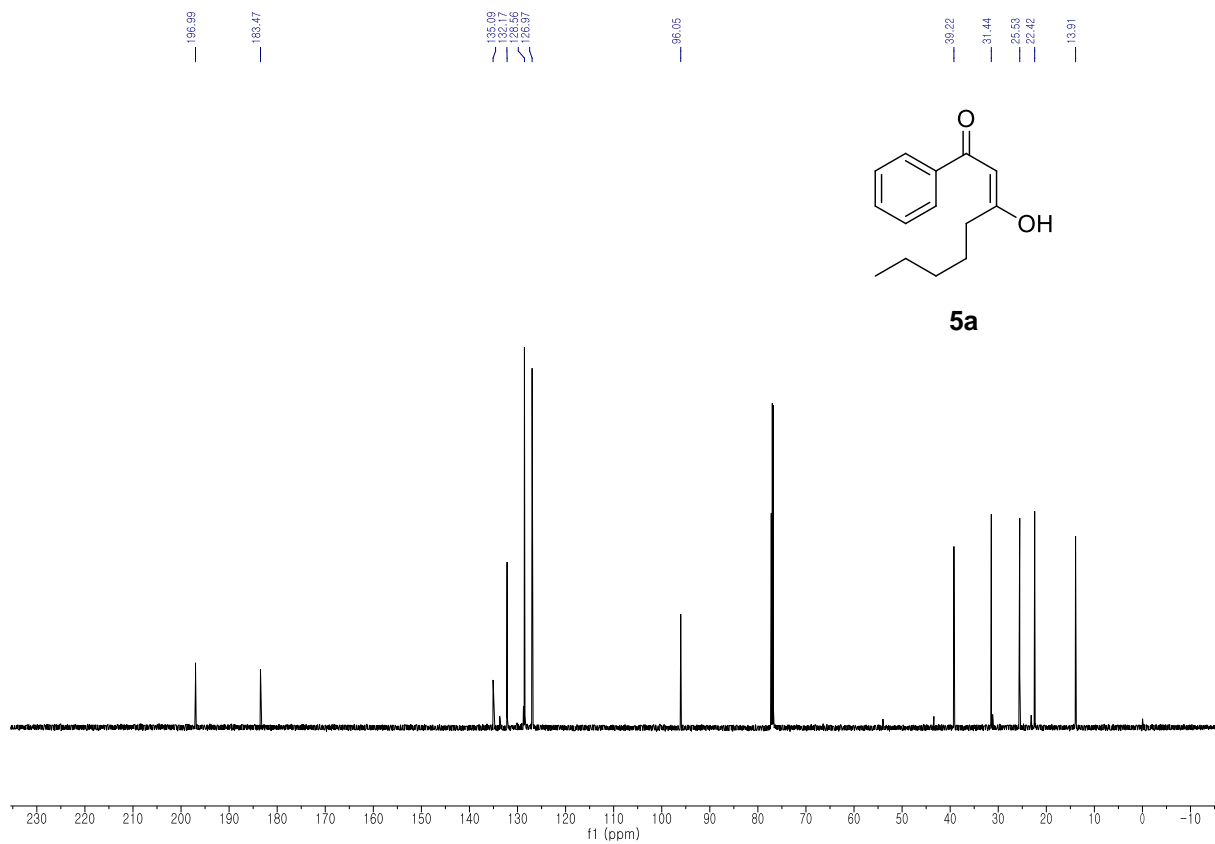

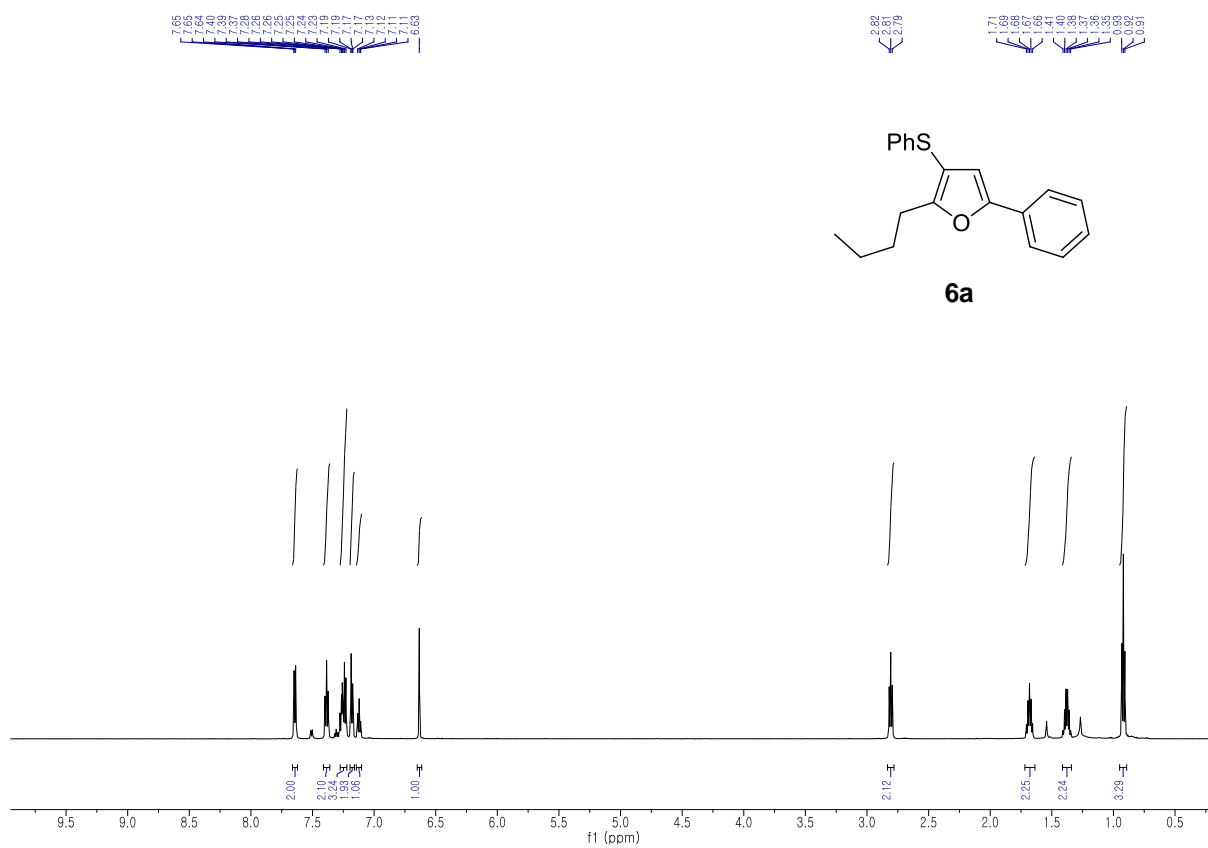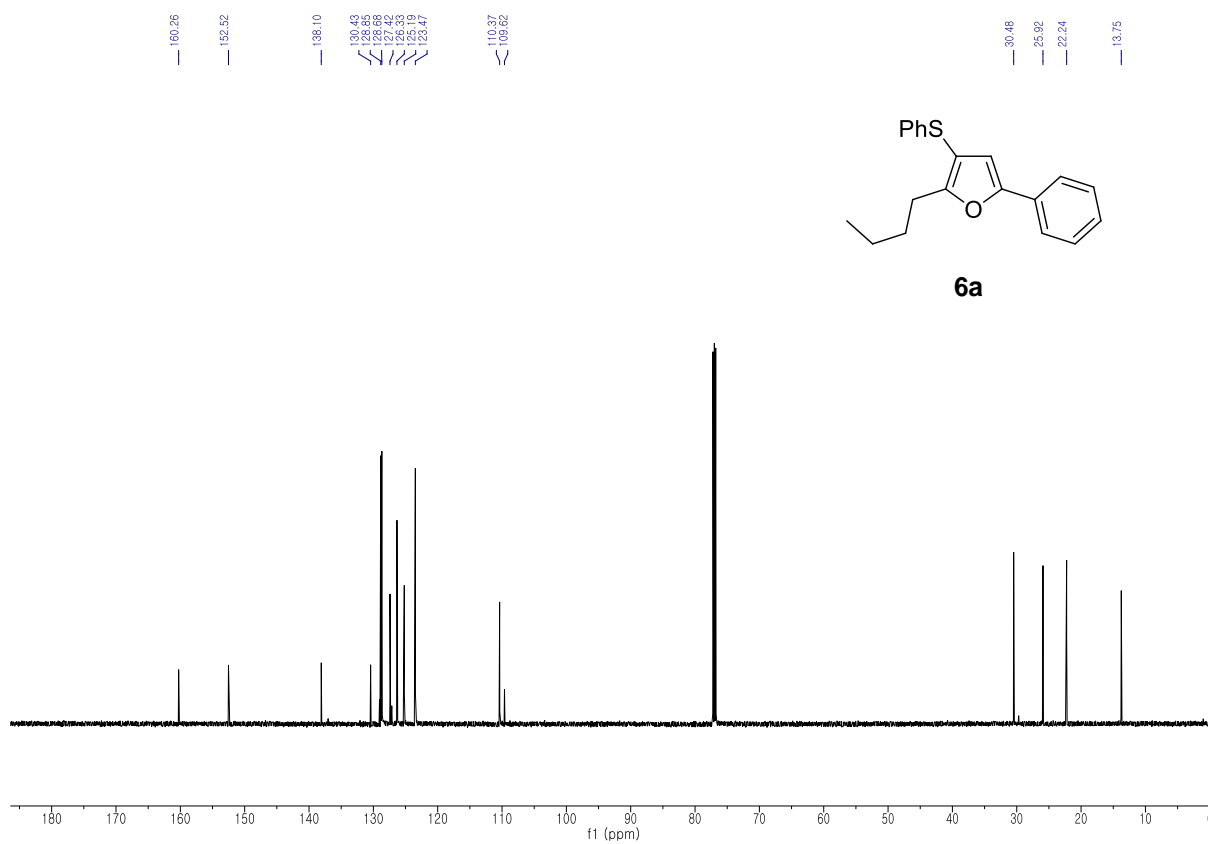

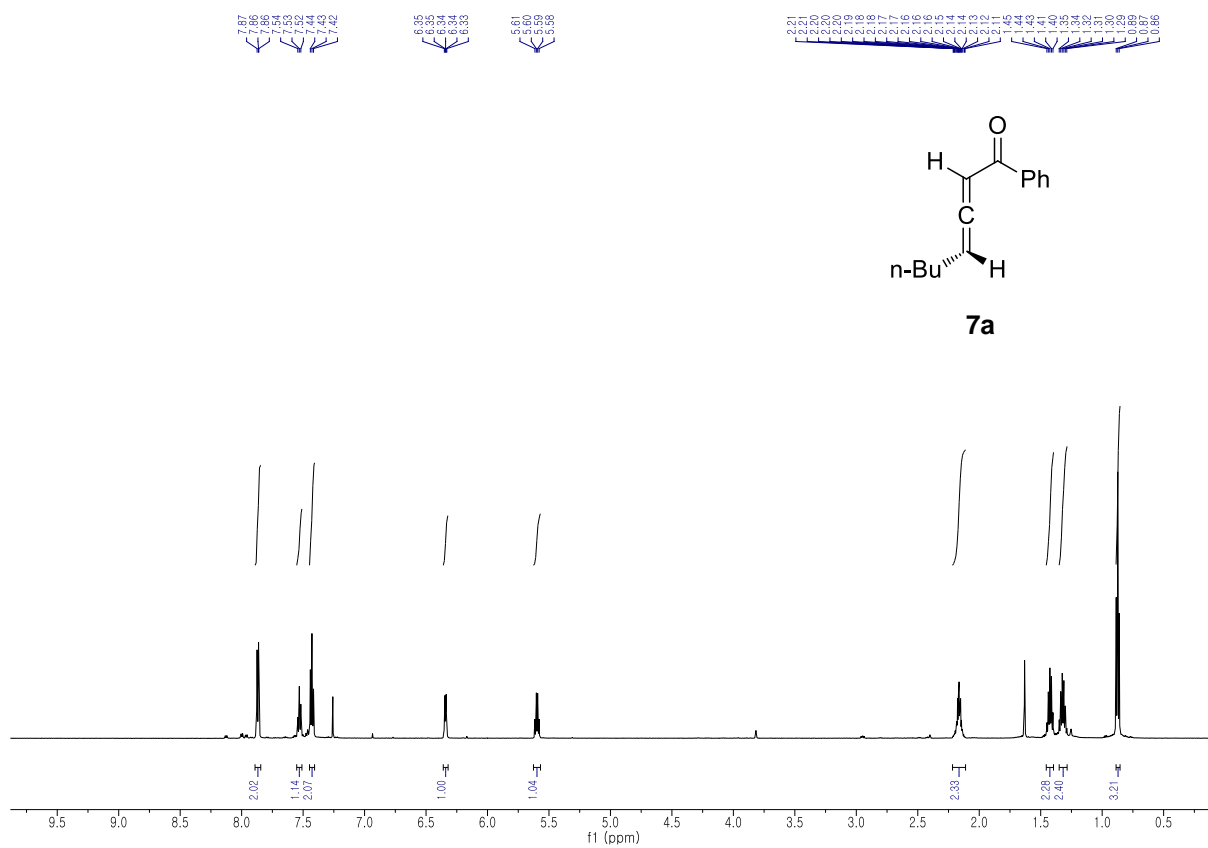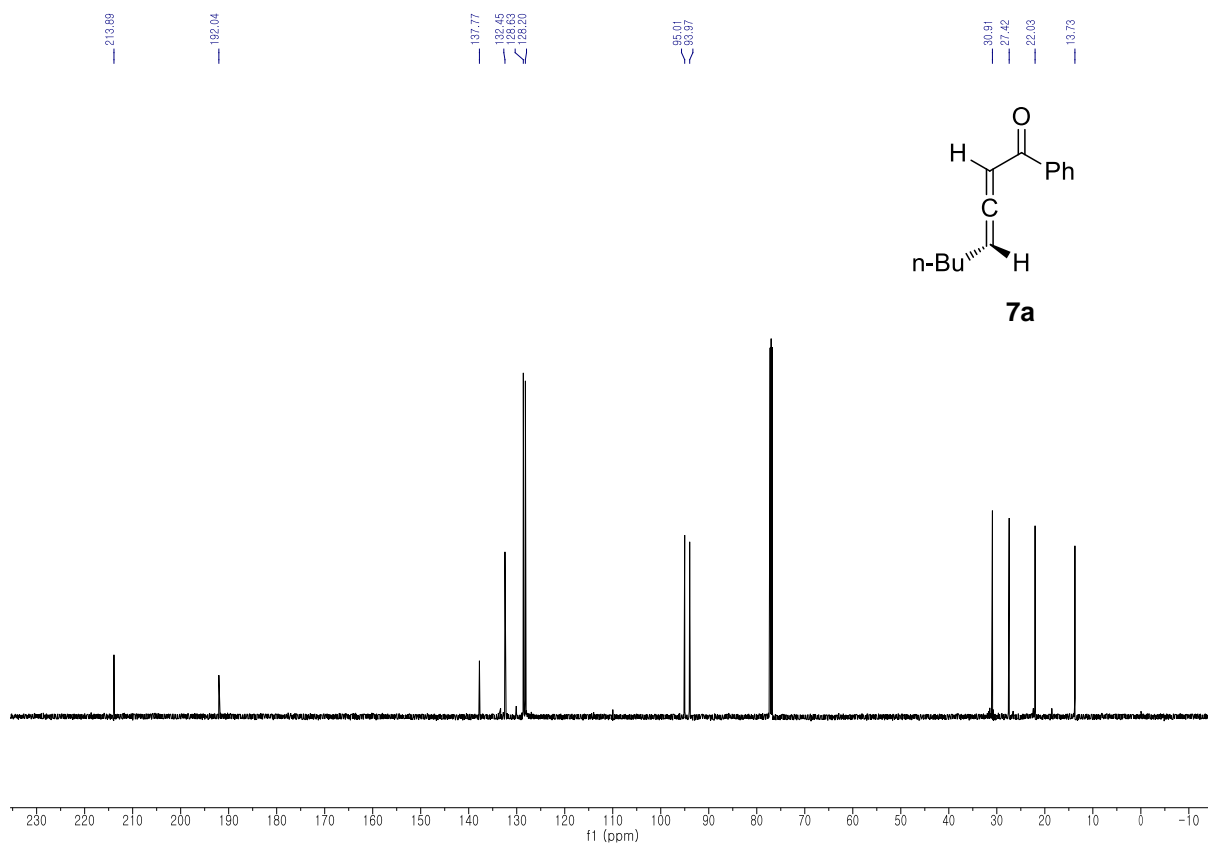

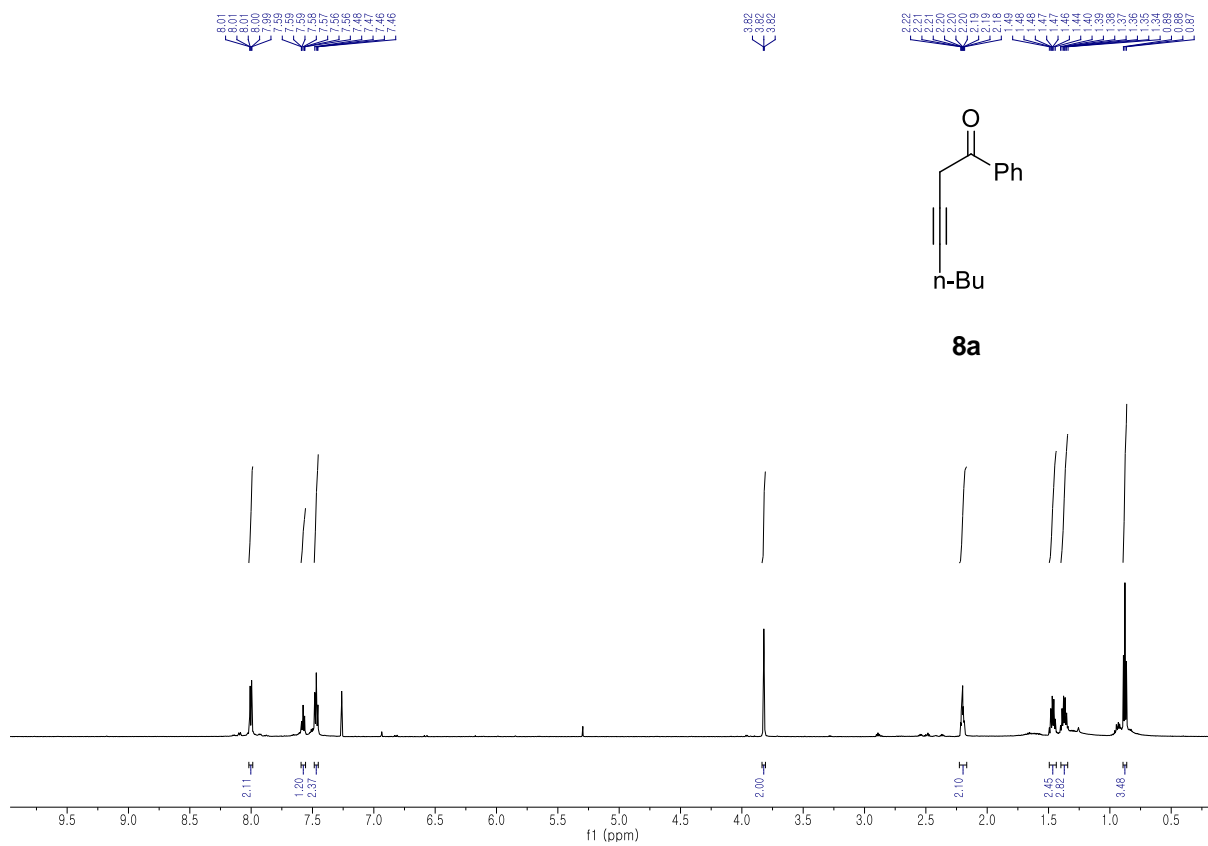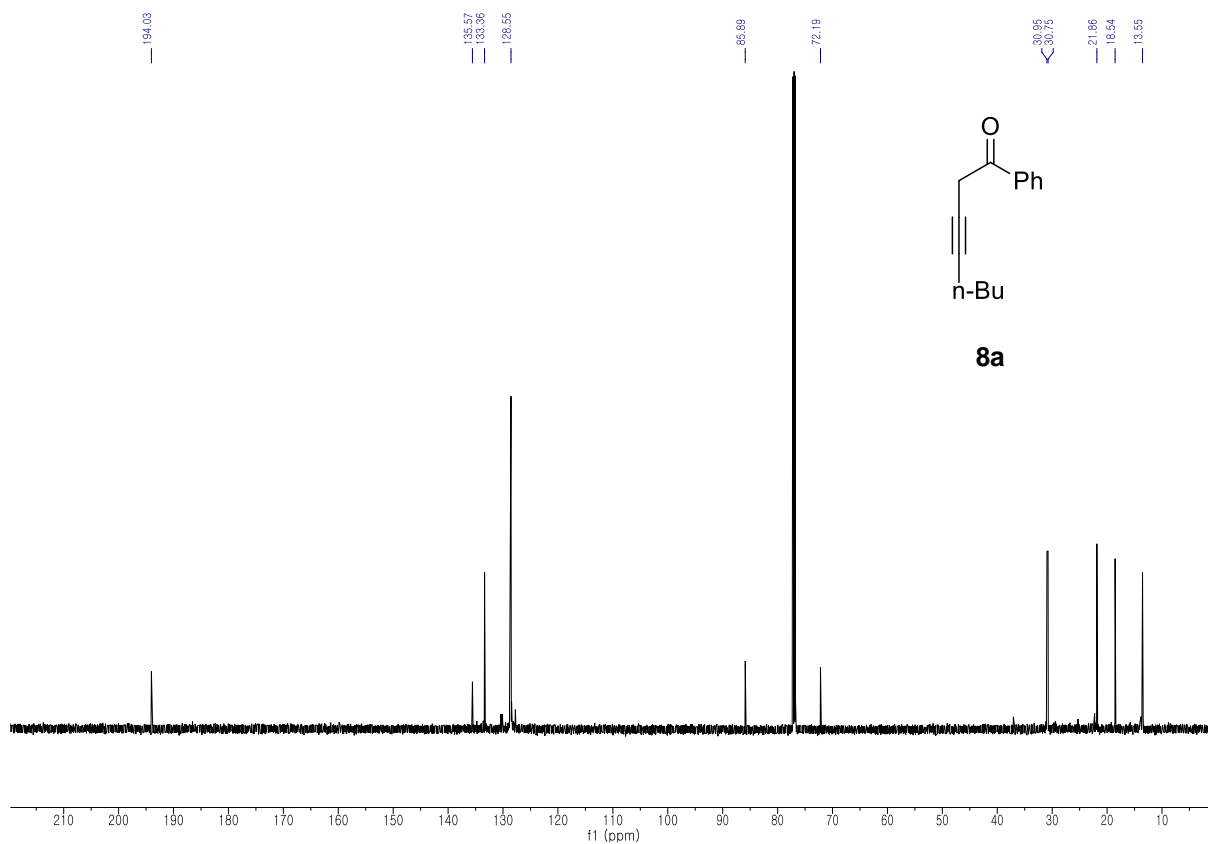

Supplement: c6ob02772e1.pdf [file c6ob02772e1.pdf]
